# Supplementary material for: Reliability of motion phase identification for long-track speed skating using inertial measurement units
Source: PeerJ. 2024 Sep 27;12:e18102. doi: 10.7717/peerj.18102 (PMC11441384; doi:10.7717/peerj.18102)
Supplement: Supplemental Information 2 [file peerj-12-18102-s002.xlsx]

## Sheet: Straight_ICC(2,1)
Skater No.	Straight_R_onset_iizuka	Straight_R_TurnBack_iizuka	Straight_R_PushOn_iizuka	Straight_R_PushOff_iizuka	Straight_R_OffSet_iizuka	Straight_L_onset_iizuka	Straight_L_TurnBack_iizuka	Straight_L_PushOn_iizuka	Straight_L_PushOff_iizuka	Straight_L_OffSet_iizuka	Straight_R_onset_tomita	Straight_R_TurnBack_tomita	Straight_R_PushOn_tomita	Straight_R_PushOff_tomita	Straight_R_OffSet_tomita	Straight_L_onset_tomita	Straight_L_TurnBack_tomita	Straight_L_PushOn_tomita	Straight_L_PushOff_tomita	Straight_L_OffSet_tomita			Straight_R_Onset_diff	Straight_R_TurnBack_diff	Straight_R_PushOn_diff	Straight_R_PushOff_diff	Straight_R_OffSet_diff	Straight_L_Onset_dif	Straight_L_TurnBack_diff	Straight_L_PushOn_diff	Straight_L_PushOff_diff	Straight_L_OffSet_diff
S001	782	1258	1582	1660	1981	763	1083	1405	1522	1890	787	1260	1582	1618	1981	765	1118	1405	1476	1890			-5	-2	0	42	0	-2	-35	0	46	0
S001	801	1310	1645	1774	2103	830	1244	1514	1696	2041	796	1314	1645	1672	2103	826	1253	1514	1620	2041			5	-4	0	102	0	4	-9	0	76	0
S001	793	1301	1638	1766	2114	853	1242	1557	1737	2085	792	1311	1638	1735	2114	842	1230	1557	1722	2085			1	-10	0	31	0	11	12	0	15	0
S001	806	1358	1662	1772	2164	888	1327	1612	1722	2125	806	1356	1662	1740	2164	764	1311	1612	1719	2125			0	2	0	32	0	124	16	0	3	0
S001	887	1433	1821	1960	2403	883	1391	1685	1880	2249	886	1482	1821	1960	2403	880	1384	1685	1881	2249			1	-49	0	0	0	3	7	0	-1	0
S001	893	1207	1769	1865	2305	980	1588	1856	1983	2389	892	1238	1769	1940	2305	981	1595	1856	2016	2389			1	-31	0	-75	0	-1	-7	0	-33	0
S001	862	1413	1769	1888	2249	808	1135	1521	1709	2067	871	1433	1769	1865	2249	808	1161	1521	1692	2067			-9	-20	0	23	0	0	-26	0	17	0
S001	893	1427	1834	1960	2368	910	1380	1730	1918	2311	895	1457	1834	1912	2368	911	1400	1730	1921	2311			-2	-30	0	48	0	-1	-20	0	-3	0
S001	891	1447	1812	1944	2357	928	1412	1768	1900	2362	901	1453	1812	1883	2357	929	1438	1768	1914	2362			-10	-6	0	61	0	-1	-26	0	-14	0
S001	877	1554	1961	2154	2600	954	1331	1771	1998	2388	883	1558	1961	2105	2600	938	1362	1771	1960	2388			-6	-4	0	49	0	16	-31	0	38	0
S002	846	1515	1750	1838	2223	692	1103	1505	1619	2021	845	1526	1750	1805	2223	706	1124	1505	1619	2021			1	-11	0	33	0	-14	-21	0	0	0
S002	849	1542	1772	1897	2270	880	1291	1731	1791	2238	851	1563	1772	1919	2270	898	1254	1731	1812	2238			-2	-21	0	-22	0	-18	37	0	-21	0
S002	901	1595	1828	1950	2354	844	1215	1767	1892	2302	918	1568	1828	1924	2354	889	1261	1767	1864	2302			-17	27	0	26	0	-45	-46	0	28	0
S002	838	1491	1787	1918	2342	881	1235	1787	1953	2327	870	1520	1787	1907	2342	909	1234	1787	1946	2327			-32	-29	0	11	0	-28	1	0	7	0
S002	883	1536	1847	1939	2411	924	1360	1830	1965	2380	912	1562	1847	2011	2411	934	1399	1830	1925	2380			-29	-26	0	-72	0	-10	-39	0	40	0
S002	883	1569	1916	2061	2481	915	1375	1869	2004	2420	962	1565	1916	2092	2481	1046	1387	1869	1975	2420			-79	4	0	-31	0	-131	-12	0	29	0
S002	886	1571	1915	1967	2434	987	1463	1937	2052	2491	895	1545	1915	2071	2434	994	1427	1937	2047	2491			-9	26	0	-104	0	-7	36	0	5	0
S002	922	1788	2057	2177	2599	722	1211	1673	1882	2319	939	1769	2057	2191	2599	747	1240	1673	1926	2319			-17	19	0	-14	0	-25	-29	0	-44	0
S002	907	1698	2005	2162	2588	968	1526	2009	2185	2573	940	1674	2005	2180	2588	980	1509	2009	2207	2573			-33	24	0	-18	0	-12	17	0	-22	0
S002	935	1707	2022	2158	2652	973	1519	2031	2146	2604	928	1710	2022	2192	2652	983	1524	2031	2174	2604			7	-3	0	-34	0	-10	-5	0	-28	0
S002	892	1676	2005	2184	2675	978	1449	2036	2239	2642	852	1671	2005	2248	2675	979	1460	2036	2279	2642			40	5	0	-64	0	-1	-11	0	-40	0
S002	927	1749	2079	2175	2679	1046	1454	2116	2213	2719	934	1752	2079	2258	2679	1057	1467	2116	2261	2719			-7	-3	0	-83	0	-11	-13	0	-48	0
S003	888	1708	1862	2017	2353	714	1312	1719	1782	2228	889	1743	1862	2006	2353	709	1311	1719	1739	2228			-1	-35	0	11	0	5	1	0	43	0
S003	867	1653	1833	1908	2343	872	1436	1809	1880	2327	861	1670	1833	1885	2343	859	1449	1809	1922	2327			6	-17	0	23	0	13	-13	0	-42	0
S003	889	1575	1732	1918	2366	877	1461	1790	1858	2255	880	1549	1732	1966	2366	853	1466	1790	1891	2255			9	26	0	-48	0	24	-5	0	-33	0
S003	882	1669	1912	2139	2589	913	1565	1907	1982	2447	885	1671	1912	2115	2589	912	1539	1907	2035	2447			-3	-2	0	24	0	1	26	0	-53	0
S003	961	1815	2084	2312	2770	1013	1732	2123	2263	2713	961	1841	2084	2286	2770	986	1746	2123	2297	2713			0	-26	0	26	0	27	-14	0	-34	0
S003	832	1612	1981	2176	2573	1069	1869	2125	2198	2635	837	1627	1981	2186	2573	1067	1857	2125	2202	2635			-5	-15	0	-10	0	2	12	0	-4	0
S003	997	1874	2125	2272	2718	879	1873	2072	2185	2665	1003	1880	2125	2366	2718	873	1850	2072	2180	2665			-6	-6	0	-94	0	6	23	0	5	0
S003	1021	1946	2168	2387	2810	972	1773	2174	2251	2717	1025	1938	2168	2392	2810	981	1779	2174	2249	2717			-4	8	0	-5	0	-9	-6	0	2	0
S003	996	1819	2093	2244	2752	1088	1798	2209	2201	2729	991	1817	2093	2203	2752	1092	1811	2209	2184	2729			5	2	0	41	0	-4	-13	0	17	0
S003	1024	1879	2139	2422	2854	1042	1838	2261	2381	2837	1024	1895	2139	2371	2854	1039	1862	2261	2282	2837			0	-16	0	51	0	3	-24	0	99	0
S004	807	1395	1553	1667	2047	734	1265	1513	1567	1987	801	1406	1553	1668	2047	735	1277	1513	1560	1987			6	-11	0	-1	0	-1	-12	0	7	0
S004	832	1391	1562	1670	2066	776	1294	1572	1616	2054	859	1423	1562	1643	2066	799	1302	1572	1573	2054			-27	-32	0	27	0	-23	-8	0	43	0
S004	816	1461	1605	1762	2122	786	1283	1580	1632	2087	870	1476	1605	1778	2122	821	1286	1580	1569	2087			-54	-15	0	-16	0	-35	-3	0	63	0
S004	844	1446	1662	1783	2152	836	1313	1641	1709	2156	867	1459	1662	1720	2152	850	1314	1641	1649	2156			-23	-13	0	63	0	-14	-1	0	60	0
S004	864	1474	1660	1746	2178	824	1348	1640	1690	2136	875	1480	1660	1783	2178	847	1350	1640	1750	2136			-11	-6	0	-37	0	-23	-2	0	-60	0
S004	866	1525	1725	1805	2256	825	1362	1685	1725	2208	884	1517	1725	1806	2256	891	1368	1685	1742	2208			-18	8	0	-1	0	-66	-6	0	-17	0
S004	868	1470	1836	1986	2391	888	1533	1759	1869	2338	940	1504	1836	2054	2391	914	1534	1759	1933	2338			-72	-34	0	-68	0	-26	-1	0	-64	0
S004	1026	1735	1880	1992	2412	802	1372	1735	1845	2338	985	1767	1880	1972	2412	826	1373	1735	1734	2338			41	-32	0	20	0	-24	-1	0	111	0
S004	872	1474	1753	1913	2320	894	1582	1811	1861	2295	908	1462	1753	1919	2320	902	1563	1811	1924	2295			-36	12	0	-6	0	-8	19	0	-63	0
S004	898	1588	1828	1977	2400	927	1470	1833	1911	2364	936	1598	1828	1959	2400	939	1476	1833	1837	2364			-38	-10	0	18	0	-12	-6	0	74	0
S004	869	1540	1803	1941	2370	950	1487	1841	1918	2397	883	1521	1803	1918	2370	959	1485	1841	1939	2397			-14	19	0	23	0	-9	2	0	-21	0
S004	901	1666	1918	2112	2570	891	1569	1820	1961	2430	920	1655	1918	2076	2570	904	1564	1820	1936	2430			-19	11	0	36	0	-13	5	0	25	0
S005	1015	1776	2110	2162	2620	820	1435	1808	2013	2527	1014	1791	2110	2237	2620	851	1473	1808	2018	2527			1	-15	0	-75	0	-31	-38	0	-5	0
S005	983	1672	1996	2094	2527	918	1506	1868	2111	2554	998	1637	1996	2193	2527	966	1440	1868	2029	2554			-15	35	0	-99	0	-48	66	0	82	0
S005	990	1568	1989	2174	2576	879	1531	1864	1999	2506	1010	1593	1989	2221	2576	945	1490	1864	2057	2506			-20	-25	0	-47	0	-66	41	0	-58	0
S005	1057	1700	2168	2343	2845	989	1540	1970	2183	2749	1049	1704	2168	2431	2845	988	1561	1970	2161	2749			8	-4	0	-88	0	1	-21	0	22	0
S005	1021	1820	2184	2307	2760	939	1591	2105	2307	2832	1045	1860	2184	2383	2760	932	1581	2105	2358	2832			-24	-40	0	-76	0	7	10	0	-51	0
S005	923	1428	2031	2117	2580	990	1926	2055	2137	2608	961	1330	2031	2161	2580	1018	1954	2055	2180	2608			-38	98	0	-44	0	-28	-28	0	-43	0
S005	1039	1886	2252	2354	2805	913	1712	2098	2249	2820	1062	1888	2252	2379	2805	929	1718	2098	2300	2820			-23	-2	0	-25	0	-16	-6	0	-51	0
S005	1078	1759	2215	2331	2846	943	1591	2028	2169	2728	999	1730	2215	2407	2846	917	1611	2028	2214	2728			79	29	0	-76	0	26	-20	0	-45	0
S005	1061	1853	2207	2411	2881	983	1720	2135	2367	2874	1052	1808	2207	2472	2881	968	1716	2135	2348	2874			9	45	0	-61	0	15	4	0	19	0
S005	1065	1884	2250	2428	2862	918	1703	2129	2281	2849	1082	1887	2250	2494	2862	919	1737	2129	2327	2849			-17	-3	0	-66	0	-1	-34	0	-46	0
S006	918	1233	1716	1725	2219	745	1310	1502	1705	2128	929	1279	1716	1745	2219	751	1285	1502	1755	2128			-11	-46	0	-20	0	-6	25	0	-50	0
S006	933	1425	1722	1756	2258	867	1335	1625	1674	2210	940	1495	1722	1754	2258	888	1306	1625	1794	2210			-7	-70	0	2	0	-21	29	0	-120	0
S006	957	1441	1714	1756	2265	891	1359	1657	1778	2248	817	1460	1714	1803	2265	887	1341	1657	1828	2248			140	-19	0	-47	0	4	18	0	-50	0
S006	918	1426	1752	1829	2354	885	1369	1678	1861	2316	735	1469	1752	1937	2354	836	1361	1678	1886	2316			183	-43	0	-108	0	49	8	0	-25	0
S006	1024	1572	1894	1992	2485	916	1488	1779	2029	2459	1020	1598	1894	1981	2485	883	1488	1779	2000	2459			4	-26	0	11	0	33	0	0	29	0
S006	740	1490	1920	1982	2522	924	1505	1802	1892	2508	712	1573	1920	1926	2522	912	1537	1802	2018	2508			28	-83	0	56	0	12	-32	0	-126	0
S006	1089	1485	1950	2097	2550	949	1513	1867	1949	2579	829	1472	1950	2159	2550	938	1489	1867	2141	2579			260	13	0	-62	0	11	24	0	-192	0
S006	1021	1579	1892	1887	2435	823	1457	1731	1858	2366	1036	1585	1892	1903	2435	839	1436	1731	1873	2366			-15	-6	0	-16	0	-16	21	0	-15	0
S006	1045	1672	1952	2011	2566	979	1493	1811	1982	2493	807	1737	1952	2032	2566	911	1507	1811	1962	2493			238	-65	0	-21	0	68	-14	0	20	0
S006	1032	1421	1955	2079	2597	1007	1509	1876	2011	2598	819	1527	1955	2078	2597	971	1491	1876	2046	2598			213	-106	0	1	0	36	18	0	-35	0
S006	1069	1684	1999	2104	2650	931	1552	1876	2022	2586	823	1700	1999	2094	2650	922	1527	1876	2024	2586			246	-16	0	10	0	9	25	0	-2	0
S006	1035	1706	2084	2132	2753	985	1650	1957	2121	2709	799	1743	2084	2176	2753	971	1655	1957	2206	2709			236	-37	0	-44	0	14	-5	0	-85	0
S007	1010	1646	2008	2130	2558	694	1234	1630	1815	2291	1016	1698	2008	2091	2558	749	1263	1630	1911	2291			-6	-52	0	39	0	-55	-29	0	-96	0
S007	961	1445	1963	2000	2535	919	1484	1907	2080	2519	936	1425	1963	2044	2535	931	1437	1907	2143	2519			25	20	0	-44	0	-12	47	0	-63	0
S007	1007	1428	1997	2073	2602	948	1521	1947	2142	2547	1016	1513	1997	2140	2602	972	1508	1947	2178	2547			-9	-85	0	-67	0	-24	13	0	-36	0
S007	1138	1675	2155	2285	2745	982	1595	2025	2289	2727	1107	1664	2155	2307	2745	1004	1624	2025	2324	2727			31	11	0	-22	0	-22	-29	0	-35	0
S007	1081	1368	2154	2237	2773	965	1562	2027	2239	2699	1049	1568	2154	2262	2773	990	1560	2027	2290	2699			32	-200	0	-25	0	-25	2	0	-51	0
S007	1041	1372	1987	2080	2505	1008	1774	2095	2258	2670	1002	1328	1987	2068	2505	1033	1810	2095	2284	2670			39	44	0	12	0	-25	-36	0	-26	0
S007	955	991	1870	1923	2452	951	1668	1868	1926	2382	935	1170	1870	2074	2452	947	1692	1868	1951	2382			20	-179	0	-151	0	4	-24	0	-25	0
S007	1057	1782	2276	2293	2806	821	1424	1856	2117	2569	1060	1745	2276	2391	2806	829	1402	1856	2135	2569			-3	37	0	-98	0	-8	22	0	-18	0
S007	1111	1799	2378	2407	2926	978	1672	2164	2317	2881	1108	1830	2378	2484	2926	994	1670	2164	2455	2881			3	-31	0	-77	0	-16	2	0	-138	0
S007	1169	1776	2508	2599	3141	1038	1667	2170	2414	2994	1191	1778	2508	2644	3141	1053	1663	2170	2566	2994			-22	-2	0	-45	0	-15	4	0	-152	0
S007	1232	1737	2506	2506	3073	1109	1942	2389	2641	3191	1234	1651	2506	2577	3073	1125	1914	2389	2760	3191			-2	86	0	-71	0	-16	28	0	-119	0
S008	845	1347	1674	1754	2190	788	826	1606	1629	2116	861	1351	1674	1776	2190	768	779	1606	1659	2116			-16	-4	0	-22	0	20	47	0	-30	0
S008	844	1484	1739	1866	2276	818	968	1671	1746	2207	849	1493	1739	1849	2276	805	981	1671	1722	2207			-5	-9	0	17	0	13	-13	0	24	0
S008	882	1503	1751	1848	2268	881	1182	1760	1778	2297	903	1539	1751	1836	2268	867	1211	1760	1754	2297			-21	-36	0	12	0	14	-29	0	24	0
S008	835	1512	1726	1776	2230	830	1237	1712	1789	2230	872	1497	1726	1795	2230	843	1261	1712	1804	2230			-37	15	0	-19	0	-13	-24	0	-15	0
S008	825	1484	1720	1747	2217	839	1253	1722	1736	2219	855	1478	1720	1804	2217	834	1247	1722	1789	2219			-30	6	0	-57	0	5	6	0	-53	0
S008	816	1374	1694	1813	2230	859	1336	1694	1687	2185	825	1357	1694	1826	2230	852	1331	1694	1749	2185			-9	17	0	-13	0	7	5	0	-62	0
S008	975	1684	2015	2136	2554	841	1567	1885	1927	2410	953	1697	2015	2141	2554	846	1554	1885	1943	2410			22	-13	0	-5	0	-5	13	0	-16	0
S008	980	1851	2112	2275	2705	985	1571	2042	2033	2604	977	1827	2112	2280	2705	978	1544	2042	2133	2604			3	24	0	-5	0	7	27	0	-100	0
S008	1000	1748	2112	2259	2701	1010	1698	2162	2247	2721	1009	1753	2112	2247	2701	996	1673	2162	2294	2721			-9	-5	0	12	0	14	25	0	-47	0
S008	1025	1837	2169	2386	2827	1052	1671	2135	2273	2754	1039	1835	2169	2343	2827	1054	1657	2135	2287	2754			-14	2	0	43	0	-2	14	0	-14	0
S009	810	1226	1575	1692	2030	725	933	1392	1545	1867	837	1278	1575	1705	2030	705	932	1392	1493	1867			-27	-52	0	-13	0	20	1	0	52	0
S009	845	1297	1616	1705	2064	827	1230	1566	1674	2057	828	1356	1616	1752	2064	836	1182	1566	1728	2057			17	-59	0	-47	0	-9	48	0	-54	0
S009	838	1204	1621	1749	2101	820	1189	1586	1687	2070	824	1258	1621	1724	2101	859	1220	1586	1696	2070			14	-54	0	25	0	-39	-31	0	-9	0
S009	852	1210	1653	1770	2150	833	1176	1640	1714	2116	851	1326	1653	1783	2150	823	1189	1640	1715	2116			1	-116	0	-13	0	10	-13	0	-1	0
S009	888	1146	1701	1842	2186	807	1190	1686	1809	2197	868	1213	1701	1862	2186	880	1169	1686	1792	2197			20	-67	0	-20	0	-73	21	0	17	0
S009	882	1262	1718	1885	2244	862	1184	1675	1863	2177	883	1252	1718	1891	2244	882	1191	1675	1865	2177			-1	10	0	-6	0	-20	-7	0	-2	0
S009	910	1218	1759	1921	2257	889	1225	1759	1904	2298	898	1216	1759	1931	2257	909	1218	1759	1894	2298			12	2	0	-10	0	-20	7	0	10	0
S009	912	1440	1785	1897	2331	755	1203	1627	1808	2196	912	1480	1785	1937	2331	763	1207	1627	1835	2196			0	-40	0	-40	0	-8	-4	0	-27	0
S009	928	1426	1827	1981	2394	915	1359	1775	1977	2360	907	1413	1827	2023	2394	945	1358	1775	1995	2360			21	13	0	-42	0	-30	1	0	-18	0
S009	918	1330	1858	1993	2447	908	1378	1823	1938	2383	867	1390	1858	2045	2447	922	1403	1823	1957	2383			51	-60	0	-52	0	-14	-25	0	-19	0
S009	921	1558	1945	2140	2563	944	1352	1888	2028	2460	935	1562	1945	2134	2563	934	1391	1888	2050	2460			-14	-4	0	6	0	10	-39	0	-22	0
S010	889	1422	1707	2002	2365	833	1341	1693	1721	2240	860	1453	1707	1971	2365	864	1428	1693	1710	2240			29	-31	0	31	0	-31	-87	0	11	0
S010	903	1532	1833	2040	2512	908	1513	1869	2021	2489	923	1597	1833	2067	2512	934	1517	1869	1978	2489			-20	-65	0	-27	0	-26	-4	0	43	0
S010	956	1609	1904	2149	2608	903	1524	1890	2185	2544	954	1593	1904	2217	2608	880	1586	1890	2011	2544			2	16	0	-68	0	23	-62	0	174	0
S010	928	1549	1865	2106	2551	931	1520	1902	2117	2532	941	1531	1865	2116	2551	950	1538	1902	2083	2532			-13	18	0	-10	0	-19	-18	0	34	0
S010	966	1547	1884	2152	2610	972	1682	1940	2166	2579	970	1538	1884	2119	2610	976	1632	1940	2244	2579			-4	9	0	33	0	-4	50	0	-78	0
S010	961	1558	1891	2179	2644	941	1619	1980	2240	2637	966	1548	1891	2140	2644	961	1686	1980	2265	2637			-5	10	0	39	0	-20	-67	0	-25	0
S010	946	1519	1816	2011	2413	998	1683	1993	2143	2603	933	1562	1816	2081	2413	1031	1750	1993	2120	2603			13	-43	0	-70	0	-33	-67	0	23	0
S010	973	1779	2094	2312	2761	833	1327	1894	2085	2575	972	1785	2094	2351	2761	863	1347	1894	1983	2575			1	-6	0	-39	0	-30	-20	0	102	0
S010	1013	1798	2139	2443	2923	1021	1709	2094	2344	2767	994	1762	2139	2458	2923	1022	1708	2094	2359	2767			19	36	0	-15	0	-1	1	0	-15	0
S010	1042	1800	2140	2391	2943	1088	1733	2198	2475	2977	1028	1787	2140	2445	2943	1084	1819	2198	2501	2977			14	13	0	-54	0	4	-86	0	-26	0
S010	1002	1663	2068	2367	2909	1068	1788	2126	2449	2877	971	1694	2068	2391	2909	1063	1770	2126	2496	2877			31	-31	0	-24	0	5	18	0	-47	0
S011	816	1174	1702	1812	2147	736	829	1399	1639	2020	804	1262	1702	1785	2147	758	1039	1399	1631	2020			12	-88	0	27	0	-22	-210	0	8	0
S011	891	1042	1767	1859	2236	838	1311	1550	1805	2163	865	1207	1767	1908	2236	852	1326	1550	1785	2163			26	-165	0	-49	0	-14	-15	0	20	0
S011	877	1264	1803	1881	2294	875	1377	1661	1943	2274	894	1305	1803	1928	2294	864	1398	1661	1933	2274			-17	-41	0	-47	0	11	-21	0	10	0
S011	899	1021	1793	1895	2281	931	1376	1683	1942	2294	879	1450	1793	1959	2281	930	1409	1683	1915	2294			20	-429	0	-64	0	1	-33	0	27	0
S011	933	1098	1837	1894	2319	895	1404	1711	1985	2308	931	1372	1837	1935	2319	910	1428	1711	1988	2308			2	-274	0	-41	0	-15	-24	0	-3	0
S011	922	1087	1801	1933	2313	910	1533	1709	1942	2277	915	1139	1801	1954	2313	964	1553	1709	1991	2277			7	-52	0	-21	0	-54	-20	0	-49	0
S011	860	1018	1677	1814	2179	898	1536	1719	1923	2244	853	1067	1677	1843	2179	922	1501	1719	1901	2244			7	-49	0	-29	0	-24	35	0	22	0
S011	992	1852	1951	2052	2448	837	1389	1702	1985	2376	1016	1782	1951	2105	2448	845	1433	1702	2001	2376			-24	70	0	-53	0	-8	-44	0	-16	0
S011	890	1662	1881	2001	2369	870	1397	1730	1992	2327	890	1694	1881	1968	2369	873	1365	1730	2021	2327			0	-32	0	33	0	-3	32	0	-29	0
S011	867	1658	1883	1965	2428	958	1441	1783	2068	2388	804	1672	1883	2019	2428	979	1490	1783	2041	2388			63	-14	0	-54	0	-21	-49	0	27	0
S011	961	1695	1928	2014	2412	947	1493	1811	2076	2457	992	1633	1928	2010	2412	932	1482	1811	2061	2457			-31	62	0	4	0	15	11	0	15	0
S011	920	1522	1932	2049	2496	917	1526	1772	2053	2371	936	1620	1932	2090	2496	937	1573	1772	2012	2371			-16	-98	0	-41	0	-20	-47	0	41	0
S012	860	1362	1613	1850	2165	712	1200	1475	1615	1999	857	1380	1613	1834	2165	723	1149	1475	1645	1999			3	-18	0	16	0	-11	51	0	-30	0
S012	846	1369	1634	1885	2230	814	1287	1612	1824	2140	825	1402	1634	1911	2230	843	1283	1612	1847	2140			21	-33	0	-26	0	-29	4	0	-23	0
S012	853	1498	1695	1849	2217	874	1347	1721	1935	2260	823	1456	1695	1841	2217	890	1303	1721	1922	2260			30	42	0	8	0	-16	44	0	13	0
S012	901	1481	1695	1904	2241	901	1338	1702	1862	2270	876	1482	1695	1936	2241	928	1299	1702	1849	2270			25	-1	0	-32	0	-27	39	0	13	0
S012	889	1513	1748	2007	2285	839	1255	1654	1957	2259	864	1524	1748	1965	2285	859	1203	1654	1877	2259			25	-11	0	42	0	-20	52	0	80	0
S012	898	1443	1695	1880	2252	867	1361	1691	1849	2232	876	1399	1695	1936	2252	884	1351	1691	1902	2232			22	44	0	-56	0	-17	10	0	-53	0
S012	875	1241	1640	1822	2188	900	1359	1708	1889	2176	853	1280	1640	1830	2188	922	1376	1708	1885	2176			22	-39	0	-8	0	-22	-17	0	4	0
S012	923	1582	1857	2096	2420	808	1273	1643	1875	2259	911	1597	1857	2150	2420	796	1265	1643	1831	2259			12	-15	0	-54	0	12	8	0	44	0
S012	956	1702	1952	2160	2535	945	1485	1864	2150	2513	958	1693	1952	2198	2535	968	1486	1864	2064	2513			-2	9	0	-38	0	-23	-1	0	86	0
S012	974	1664	1967	2222	2561	954	1468	1834	2102	2472	963	1674	1967	2203	2561	983	1441	1834	2067	2472			11	-10	0	19	0	-29	27	0	35	0
S012	1003	1706	2006	2302	2634	1016	1618	1967	2239	2630	1003	1713	2006	2242	2634	1015	1593	1967	2243	2630			0	-7	0	60	0	1	25	0	-4	0
S012	941	1731	1987	2252	2634	1014	1641	1926	2231	2550	969	1739	1987	2341	2634	1009	1611	1926	2177	2550			-28	-8	0	-89	0	5	30	0	54	0
S013	865	1338	1755	2005	2387	783	1187	1553	1805	2190	849	1372	1755	1949	2387	789	1214	1553	1704	2190			16	-34	0	56	0	-6	-27	0	101	0
S013	922	1395	1849	2041	2467	925	1470	1831	2007	2434	938	1406	1849	1970	2467	920	1488	1831	1991	2434			-16	-11	0	71	0	5	-18	0	16	0
S013	936	1473	1899	2111	2556	971	1435	1852	2093	2467	948	1429	1899	2089	2556	975	1453	1852	2007	2467			-12	44	0	22	0	-4	-18	0	86	0
S013	903	1462	1918	2150	2569	1018	1495	1939	2160	2600	895	1446	1918	2079	2569	1036	1514	1939	2210	2600			8	16	0	71	0	-18	-19	0	-50	0
S013	936	1495	2005	2241	2705	998	1522	1950	2275	2654	995	1532	2005	2206	2705	1003	1467	1950	2267	2654			-59	-37	0	35	0	-5	55	0	8	0
S013	969	1485	1898	2159	2481	985	1563	1966	2195	2646	987	1455	1898	2032	2481	1019	1548	1966	2244	2646			-18	30	0	127	0	-34	15	0	-49	0
S013	1020	1520	1985	2219	2636	828	1349	1753	1995	2402	1028	1554	1985	2152	2636	839	1385	1753	2025	2402			-8	-34	0	67	0	-11	-36	0	-30	0
S013	1013	1540	1943	2239	2615	990	1560	1955	2184	2614	1012	1549	1943	2106	2615	975	1553	1955	2296	2614			1	-9	0	133	0	15	7	0	-112	0
S013	978	1645	2079	2306	2737	995	1516	1951	2177	2642	967	1658	2079	2267	2737	982	1559	1951	2251	2642			11	-13	0	39	0	13	-43	0	-74	0
S013	989	1698	2122	2387	2787	1100	1665	2095	2320	2766	995	1728	2122	2264	2787	1084	1683	2095	2333	2766			-6	-30	0	123	0	16	-18	0	-13	0
S014	951	1460	1707	1890	2225	753	1083	1526	1685	2051	953	1462	1707	1765	2225	769	1113	1526	1663	2051			-2	-2	0	125	0	-16	-30	0	22	0
S014	956	1450	1722	1981	2293	860	1355	1727	1892	2238	971	1480	1722	1961	2293	892	1359	1727	1910	2238			-15	-30	0	20	0	-32	-4	0	-18	0
S014	906	1466	1730	1889	2267	930	1303	1739	1912	2279	934	1471	1730	1870	2267	924	1268	1739	1928	2279			-28	-5	0	19	0	6	35	0	-16	0
S014	940	1500	1772	2001	2311	895	1354	1760	1884	2295	937	1515	1772	1969	2311	901	1382	1760	1974	2295			3	-15	0	32	0	-6	-28	0	-90	0
S014	974	1475	1811	2035	2374	923	1389	1773	1933	2331	992	1543	1811	2052	2374	931	1385	1773	1963	2331			-18	-68	0	-17	0	-8	4	0	-30	0
S014	922	1388	1759	2026	2359	936	1423	1796	1896	2319	930	1425	1759	1989	2359	966	1393	1796	1957	2319			-8	-37	0	37	0	-30	30	0	-61	0
S014	843	957	1635	1803	2184	954	1577	1792	1864	2255	827	937	1635	1872	2184	945	1605	1792	1867	2255			16	20	0	-69	0	9	-28	0	-3	0
S014	1048	1737	2016	2172	2525	806	1333	1747	1940	2380	1054	1724	2016	2137	2525	820	1367	1747	2038	2380			-6	13	0	35	0	-14	-34	0	-98	0
S014	1072	1695	2000	2212	2631	980	1576	1912	2130	2512	1057	1707	2000	2192	2631	989	1597	1912	2124	2512			15	-12	0	20	0	-9	-21	0	6	0
S014	1021	1688	2017	2199	2584	1086	1554	2024	2253	2632	1036	1696	2017	2264	2584	1087	1541	2024	2243	2632			-15	-8	0	-65	0	-1	13	0	10	0
S014	1056	1712	2009	2341	2686	1002	1631	1975	2169	2563	1073	1692	2009	2321	2686	1035	1592	1975	2180	2563			-17	20	0	20	0	-33	39	0	-11	0
S015	896	1508	1708	1951	2298	733	1257	1540	1828	2206	908	1527	1708	1876	2298	740	1282	1540	1862	2206			-12	-19	0	75	0	-7	-25	0	-34	0
S015	917	1522	1737	2005	2389	812	1295	1644	1954	2325	932	1512	1737	2002	2389	804	1359	1644	1965	2325			-15	10	0	3	0	8	-64	0	-11	0
S015	893	1612	1805	2076	2496	805	1410	1720	1995	2387	903	1600	1805	2116	2496	813	1394	1720	1987	2387			-10	12	0	-40	0	-8	16	0	8	0
S015	911	1616	1846	2134	2573	925	1496	1841	2101	2520	922	1644	1846	2122	2573	903	1496	1841	2115	2520			-11	-28	0	12	0	22	0	0	-14	0
S015	952	1678	1901	2195	2632	952	1516	1882	2269	2600	1019	1741	1901	2231	2632	962	1556	1882	2252	2600			-67	-63	0	-36	0	-10	-40	0	17	0
S015	907	1667	1847	2077	2476	980	1504	1900	2109	2552	954	1663	1847	2102	2476	1019	1484	1900	2128	2552			-47	4	0	-25	0	-39	20	0	-19	0
S015	1025	1804	2017	2299	2674	829	1528	1807	2178	2582	1026	1831	2017	2275	2674	831	1491	1807	2162	2582			-1	-27	0	24	0	-2	37	0	16	0
S015	953	1684	1901	2249	2609	1000	1596	1885	2182	2556	932	1706	1901	2201	2609	1004	1602	1885	2160	2556			21	-22	0	48	0	-4	-6	0	22	0
S015	930	1731	1948	2333	2724	992	1616	1939	2191	2641	933	1717	1948	2264	2724	986	1595	1939	2162	2641			-3	14	0	69	0	6	21	0	29	0
S015	964	1846	2089	2410	2905	1007	1657	2042	2421	2882	975	1852	2089	2429	2905	1028	1688	2042	2380	2882			-11	-6	0	-19	0	-21	-31	0	41	0

## Sheet: Curve_ICC(2,1)
Skater No.	Curve_R_onset_iizuka	Curve_R_PushOn_iizuka	Curve_R_PushOff_iizuka	Curve_R_OffSet_iizuka	Curve_L_onset_iizuka	Curve_L_PushOn_iizuka	Curve_L_PushOff_iizuka	Curve_L_OffSet_iizuka	Curve_R_onset_tomita	Curve_R_PushOn_tomita	Curve_R_PushOff_tomita	Curve_R_OffSet_tomita	Curve_L_onset_tomita	Curve_L_PushOn_tomita	Curve_L_PushOff_tomita	Curve_L_OffSet_tomita		Curve_R_onset_mean	Curve_R_onset_diff	Curve_R_PushOn_mean	Curve_R_PushOn_diff	Curve_R_PushOff_mean	Curve_R_PushOff_diff	Curve_R_OffSet_mean	Curve_R_OffSet_diff	Curve_L_onset_mean	Curve_L_onset_diff	Curve_L_PushOn_mean	Curve_L_PushOn_diff	Curve_L_PushOff_mean	Curve_L_PushOff_diff	Curve_L_OffSet_mean	Curve_L_OffSet_diff
S001	529	1125	1194	1461	816	1307	1347	1572	532	1125	1065	1461	799	1307	1377	1572		530.5	-3	1125	0	1129.5	129	1461	0	807.5	17	1307	0	1362	-30	1572	0
S001	546	1058	1131	1410	736	1153	1186	1421	553	1058	1126	1410	728	1153	1172	1421		549.5	-7	1058	0	1128.5	5	1410	0	732	8	1153	0	1179	14	1421	0
S001	554	1060	1139	1389	706	1128	1170	1418	545	1060	1096	1389	687	1128	1196	1418		549.5	9	1060	0	1117.5	43	1389	0	696.5	19	1128	0	1183	-26	1418	0
S001	576	1109	1141	1460	706	1096	1163	1419	574	1109	1074	1460	697	1096	1119	1419		575	2	1109	0	1107.5	67	1460	0	701.5	9	1096	0	1141	44	1419	0
S001	581	1128	1159	1464	719	1149	1236	1514	585	1128	1059	1464	700	1149	1209	1514		583	-4	1128	0	1109	100	1464	0	709.5	19	1149	0	1222.5	27	1514	0
S001	643	1217	1335	1588	670	1164	1214	1474	629	1217	1207	1588	679	1164	1178	1474		636	14	1217	0	1271	128	1588	0	674.5	-9	1164	0	1196	36	1474	0
S001	574	1146	1192	1524	788	1195	1292	1560	553	1146	1115	1524	615	1195	1278	1560		563.5	21	1146	0	1153.5	77	1524	0	701.5	173	1195	0	1285	14	1560	0
S001	582	1152	1207	1519	714	1167	1271	1506	560	1152	1074	1519	699	1167	1266	1506		571	22	1152	0	1140.5	133	1519	0	706.5	15	1167	0	1268.5	5	1506	0
S001	568	1129	1167	1495	753	1158	1183	1478	568	1129	1077	1495	743	1158	1204	1478		568	0	1129	0	1122	90	1495	0	748	10	1158	0	1193.5	-21	1478	0
S001	592	1205	1251	1599	774	1204	1238	1538	589	1205	1182	1599	759	1204	1248	1538		590.5	3	1205	0	1216.5	69	1599	0	766.5	15	1204	0	1243	-10	1538	0
S001	688	1338	1416	1817	972	1704	1762	2061	674	1338	1374	1817	972	1704	1755	2061		681	14	1338	0	1395	42	1817	0	972	0	1704	0	1758.5	7	2061	0
S001	665	1307	1361	1769	799	1412	1445	1759	653	1307	1291	1769	802	1412	1440	1759		659	12	1307	0	1326	70	1769	0	800.5	-3	1412	0	1442.5	5	1759	0
S001	715	1305	1380	1768	821	1421	1442	1815	712	1305	1351	1768	796	1421	1475	1815		713.5	3	1305	0	1365.5	29	1768	0	808.5	25	1421	0	1458.5	-33	1815	0
S001	672	1296	1399	1752	763	1362	1402	1739	673	1296	1257	1752	763	1362	1429	1739		672.5	-1	1296	0	1328	142	1752	0	763	0	1362	0	1415.5	-27	1739	0
S001	695	1303	1297	1737	805	1370	1432	1777	703	1303	1286	1737	802	1370	1484	1777		699	-8	1303	0	1291.5	11	1737	0	803.5	3	1370	0	1458	-52	1777	0
S001	708	1362	1404	1783	778	1376	1380	1729	716	1362	1331	1783	761	1376	1428	1729		712	-8	1362	0	1367.5	73	1783	0	769.5	17	1376	0	1404	-48	1729	0
S001	713	1355	1396	1837	818	1382	1458	1802	714	1355	1402	1837	811	1382	1457	1802		713.5	-1	1355	0	1399	-6	1837	0	814.5	7	1382	0	1457.5	1	1802	0
S002	591	1239	1285	1672	825	1533	1567	1900	596	1239	1246	1672	831	1533	1590	1900		593.5	-5	1239	0	1265.5	39	1672	0	828	-6	1533	0	1578.5	-23	1900	0
S002	629	1154	1234	1572	635	1269	1312	1605	658	1154	1076	1572	649	1269	1315	1605		643.5	-29	1154	0	1155	158	1572	0	642	-14	1269	0	1313.5	-3	1605	0
S002	638	1198	1218	1616	643	1261	1272	1603	649	1198	1160	1616	639	1261	1304	1603		643.5	-11	1198	0	1189	58	1616	0	641	4	1261	0	1288	-32	1603	0
S002	659	1193	1199	1609	669	1265	1306	1613	674	1193	1169	1609	645	1265	1342	1613		666.5	-15	1193	0	1184	30	1609	0	657	24	1265	0	1324	-36	1613	0
S002	671	1223	1251	1643	628	1270	1290	1623	659	1223	1216	1643	642	1270	1307	1623		665	12	1223	0	1233.5	35	1643	0	635	-14	1270	0	1298.5	-17	1623	0
S002	721	1306	1326	1748	659	1340	1360	1720	703	1306	1291	1748	644	1340	1433	1720		712	18	1306	0	1308.5	35	1748	0	651.5	15	1340	0	1396.5	-73	1720	0
S002	651	1239	1296	1667	664	1326	1342	1679	657	1239	1199	1667	673	1326	1385	1679		654	-6	1239	0	1247.5	97	1667	0	668.5	-9	1326	0	1363.5	-43	1679	0
S002	677	1278	1330	1718	679	1339	1381	1712	724	1278	1281	1718	712	1339	1377	1712		700.5	-47	1278	0	1305.5	49	1718	0	695.5	-33	1339	0	1379	4	1712	0
S002	669	1260	1314	1736	652	1347	1338	1703	693	1260	1281	1736	671	1347	1337	1703		681	-24	1260	0	1297.5	33	1736	0	661.5	-19	1347	0	1337.5	1	1703	0
S002	683	1286	1344	1733	651	1374	1369	1748	675	1286	1278	1733	671	1374	1460	1748		679	8	1286	0	1311	66	1733	0	661	-20	1374	0	1414.5	-91	1748	0
S002	621	1332	1381	1837	937	1726	1726	2111	692	1332	1408	1837	931	1726	1839	2111		656.5	-71	1332	0	1394.5	-27	1837	0	934	6	1726	0	1782.5	-113	2111	0
S002	712	1394	1479	1921	690	1445	1479	1871	726	1394	1524	1921	691	1445	1489	1871		719	-14	1394	0	1501.5	-45	1921	0	690.5	-1	1445	0	1484	-10	1871	0
S002	677	1372	1422	1892	719	1495	1543	1912	704	1372	1474	1892	732	1495	1557	1912		690.5	-27	1372	0	1448	-52	1892	0	725.5	-13	1495	0	1550	-14	1912	0
S002	584	1381	1458	1865	735	1477	1502	1901	600	1381	1453	1865	732	1477	1516	1901		592	-16	1381	0	1455.5	5	1865	0	733.5	3	1477	0	1509	-14	1901	0
S002	669	1381	1471	1873	691	1470	1465	1891	675	1381	1487	1873	716	1470	1528	1891		672	-6	1381	0	1479	-16	1873	0	703.5	-25	1470	0	1496.5	-63	1891	0
S002	631	1420	1491	1930	692	1486	1467	1879	728	1420	1471	1930	724	1486	1577	1879		679.5	-97	1420	0	1481	20	1930	0	708	-32	1486	0	1522	-110	1879	0
S002	636	1407	1539	1914	691	1477	1494	1877	711	1407	1564	1914	688	1477	1569	1877		673.5	-75	1407	0	1551.5	-25	1914	0	689.5	3	1477	0	1531.5	-75	1877	0
S002	643	1448	1539	1942	786	1537	1567	1957	778	1448	1534	1942	806	1537	1604	1957		710.5	-135	1448	0	1536.5	5	1942	0	796	-20	1537	0	1585.5	-37	1957	0
S003	645	1177	1324	1625	765	1366	1417	1757	630	1177	1204	1625	744	1366	1499	1757		637.5	15	1177	0	1264	120	1625	0	754.5	21	1366	0	1458	-82	1757	0
S003	619	1055	1244	1514	675	1219	1233	1515	608	1055	1088	1514	662	1219	1238	1515		613.5	11	1055	0	1166	156	1514	0	668.5	13	1219	0	1235.5	-5	1515	0
S003	651	1143	1256	1576	679	1279	1324	1585	610	1143	1148	1576	670	1279	1335	1585		630.5	41	1143	0	1202	108	1576	0	674.5	9	1279	0	1329.5	-11	1585	0
S003	648	1189	1306	1670	673	1272	1305	1635	622	1189	1210	1670	673	1272	1324	1635		635	26	1189	0	1258	96	1670	0	673	0	1272	0	1314.5	-19	1635	0
S003	637	1115	1215	1598	664	1278	1235	1597	623	1115	1165	1598	648	1278	1352	1597		630	14	1115	0	1190	50	1598	0	656	16	1278	0	1293.5	-117	1597	0
S003	605	1098	1170	1546	680	1260	1238	1579	593	1098	1166	1546	669	1260	1329	1579		599	12	1098	0	1168	4	1546	0	674.5	11	1260	0	1283.5	-91	1579	0
S003	632	1162	1237	1657	674	1252	1191	1614	635	1162	1220	1657	659	1252	1259	1614		633.5	-3	1162	0	1228.5	17	1657	0	666.5	15	1252	0	1225	-68	1614	0
S003	642	1177	1361	1714	673	1291	1203	1671	626	1177	1265	1714	678	1291	1347	1671		634	16	1177	0	1313	96	1714	0	675.5	-5	1291	0	1275	-144	1671	0
S003	621	1280	1327	1788	735	1385	1300	1742	602	1280	1318	1788	735	1385	1430	1742		611.5	19	1280	0	1322.5	9	1788	0	735	0	1385	0	1365	-130	1742	0
S003	688	1289	1547	1934	1074	1810	1846	2251	676	1289	1482	1934	1064	1810	1894	2251		682	12	1289	0	1514.5	65	1934	0	1069	10	1810	0	1870	-48	2251	0
S003	591	1372	1607	1979	774	1519	1439	1987	587	1372	1534	1979	771	1519	1557	1987		589	4	1372	0	1570.5	73	1979	0	772.5	3	1519	0	1498	-118	1987	0
S003	707	1323	1504	1902	731	1508	1497	1928	690	1323	1457	1902	746	1508	1604	1928		698.5	17	1323	0	1480.5	47	1902	0	738.5	-15	1508	0	1550.5	-107	1928	0
S003	706	1265	1465	1878	748	1439	1469	1848	689	1265	1457	1878	748	1439	1542	1848		697.5	17	1265	0	1461	8	1878	0	748	0	1439	0	1505.5	-73	1848	0
S003	653	1350	1581	1976	750	1501	1522	1936	656	1350	1553	1976	752	1501	1608	1936		654.5	-3	1350	0	1567	28	1976	0	751	-2	1501	0	1565	-86	1936	0
S003	791	1603	1882	2299	790	1657	1662	2121	773	1603	1936	2299	785	1657	1743	2121		782	18	1603	0	1909	-54	2299	0	787.5	5	1657	0	1702.5	-81	2121	0
S004	526	1025	1104	1505	794	1354	1332	1646	521	1025	1076	1505	811	1354	1340	1646		523.5	5	1025	0	1090	28	1505	0	802.5	-17	1354	0	1336	-8	1646	0
S004	526	1028	1064	1491	660	1210	1151	1474	551	1028	1054	1491	661	1210	1177	1474		538.5	-25	1028	0	1059	10	1491	0	660.5	-1	1210	0	1164	-26	1474	0
S004	521	1058	1166	1578	665	1235	1229	1552	531	1058	1072	1578	671	1235	1264	1552		526	-10	1058	0	1119	94	1578	0	668	-6	1235	0	1246.5	-35	1552	0
S004	522	1046	1127	1561	659	1245	1210	1552	539	1046	1145	1561	679	1245	1234	1552		530.5	-17	1046	0	1136	-18	1561	0	669	-20	1245	0	1222	-24	1552	0
S004	513	1000	1098	1503	693	1215	1176	1509	500	1000	1093	1503	688	1215	1230	1509		506.5	13	1000	0	1095.5	5	1503	0	690.5	5	1215	0	1203	-54	1509	0
S004	523	1021	1127	1608	662	1249	1139	1521	506	1021	1190	1608	701	1249	1230	1521		514.5	17	1021	0	1158.5	-63	1608	0	681.5	-39	1249	0	1184.5	-91	1521	0
S004	447	971	1119	1561	734	1277	1238	1567	446	971	1142	1561	753	1277	1269	1567		446.5	1	971	0	1130.5	-23	1561	0	743.5	-19	1277	0	1253.5	-31	1567	0
S004	472	986	1144	1651	719	1338	1304	1622	471	986	1232	1651	721	1338	1327	1622		471.5	1	986	0	1188	-88	1651	0	720	-2	1338	0	1315.5	-23	1622	0
S004	467	990	1160	1586	750	1347	1281	1627	523	990	1193	1586	789	1347	1279	1627		495	-56	990	0	1176.5	-33	1586	0	769.5	-39	1347	0	1280	2	1627	0
S004	596	1157	1437	1864	939	1628	1585	1980	597	1157	1548	1864	958	1628	1704	1980		596.5	-1	1157	0	1492.5	-111	1864	0	948.5	-19	1628	0	1644.5	-119	1980	0
S004	463	1151	1373	1883	765	1459	1443	1837	526	1151	1477	1883	784	1459	1470	1837		494.5	-63	1151	0	1425	-104	1883	0	774.5	-19	1459	0	1456.5	-27	1837	0
S004	506	1085	1303	1735	804	1450	1387	1817	485	1085	1304	1735	837	1450	1511	1817		495.5	21	1085	0	1303.5	-1	1735	0	820.5	-33	1450	0	1449	-124	1817	0
S004	534	1160	1424	1857	762	1410	1408	1772	544	1160	1495	1857	753	1410	1463	1772		539	-10	1160	0	1459.5	-71	1857	0	757.5	9	1410	0	1435.5	-55	1772	0
S004	489	1145	1292	1751	821	1486	1486	1884	480	1145	1335	1751	823	1486	1521	1884		484.5	9	1145	0	1313.5	-43	1751	0	822	-2	1486	0	1503.5	-35	1884	0
S004	451	1291	1529	1963	731	1423	1390	1814	643	1291	1498	1963	745	1423	1479	1814		547	-192	1291	0	1513.5	31	1963	0	738	-14	1423	0	1434.5	-89	1814	0
S004	482	1233	1385	1853	799	1475	1470	1904	522	1233	1437	1853	808	1475	1543	1904		502	-40	1233	0	1411	-52	1853	0	803.5	-9	1475	0	1506.5	-73	1904	0
S005	606	1363	1464	1834	770	1546	1586	1919	639	1363	1475	1834	792	1546	1566	1919		622.5	-33	1363	0	1469.5	-11	1834	0	781	-22	1546	0	1576	20	1919	0
S005	611	1411	1519	1878	751	1459	1505	1835	651	1411	1574	1878	768	1459	1462	1835		631	-40	1411	0	1546.5	-55	1878	0	759.5	-17	1459	0	1483.5	43	1835	0
S005	746	1391	1469	1863	754	1489	1518	1894	588	1391	1480	1863	786	1489	1535	1894		667	158	1391	0	1474.5	-11	1863	0	770	-32	1489	0	1526.5	-17	1894	0
S005	732	1413	1527	1881	750	1443	1452	1868	682	1413	1376	1881	744	1443	1505	1868		707	50	1413	0	1451.5	151	1881	0	747	6	1443	0	1478.5	-53	1868	0
S005	803	1433	1536	1893	761	1465	1505	1901	783	1433	1409	1893	790	1465	1527	1901		793	20	1433	0	1472.5	127	1893	0	775.5	-29	1465	0	1516	-22	1901	0
S005	686	1417	1543	1899	761	1444	1411	1843	718	1417	1387	1899	784	1444	1428	1843		702	-32	1417	0	1465	156	1899	0	772.5	-23	1444	0	1419.5	-17	1843	0
S005	739	1403	1472	1897	756	1515	1499	1921	683	1403	1408	1897	762	1515	1536	1921		711	56	1403	0	1440	64	1897	0	759	-6	1515	0	1517.5	-37	1921	0
S005	742	1493	1486	2039	766	1537	1571	1959	768	1493	1493	2039	798	1537	1616	1959		755	-26	1493	0	1489.5	-7	2039	0	782	-32	1537	0	1593.5	-45	1959	0
S005	810	1561	1615	2065	728	1605	1647	2022	804	1561	1585	2065	784	1605	1651	2022		807	6	1561	0	1600	30	2065	0	756	-56	1605	0	1649	-4	2022	0
S005	918	1744	1882	2347	959	1867	1888	2443	813	1744	1928	2347	979	1867	1991	2443		865.5	105	1744	0	1905	-46	2347	0	969	-20	1867	0	1939.5	-103	2443	0
S005	946	1676	1841	2311	813	1720	1829	2253	820	1676	1914	2311	843	1720	1876	2253		883	126	1676	0	1877.5	-73	2311	0	828	-30	1720	0	1852.5	-47	2253	0
S005	899	1719	1863	2357	867	1785	1891	2368	831	1719	1900	2357	872	1785	1982	2368		865	68	1719	0	1881.5	-37	2357	0	869.5	-5	1785	0	1936.5	-91	2368	0
S005	882	1690	1717	2287	874	1801	1881	2373	880	1690	1731	2287	863	1801	1978	2373		881	2	1690	0	1724	-14	2287	0	868.5	11	1801	0	1929.5	-97	2373	0
S005	876	1875	1814	2380	764	1759	1875	2340	854	1875	1839	2380	776	1759	1938	2340		865	22	1875	0	1826.5	-25	2380	0	770	-12	1759	0	1906.5	-63	2340	0
S005	888	1820	1818	2396	825	1751	1832	2280	838	1820	1942	2396	816	1751	1848	2280		863	50	1820	0	1880	-124	2396	0	820.5	9	1751	0	1840	-16	2280	0
S006	588	1102	1407	1601	769	1467	1515	1779	629	1102	1142	1601	748	1467	1503	1779		608.5	-41	1102	0	1274.5	265	1601	0	758.5	21	1467	0	1509	12	1779	0
S006	573	1059	1345	1496	691	1229	1215	1505	596	1059	1050	1496	618	1229	1220	1505		584.5	-23	1059	0	1197.5	295	1496	0	654.5	73	1229	0	1217.5	-5	1505	0
S006	622	1140	1456	1598	678	1255	1296	1569	645	1140	1153	1598	685	1255	1288	1569		633.5	-23	1140	0	1304.5	303	1598	0	681.5	-7	1255	0	1292	8	1569	0
S006	657	1169	1484	1666	722	1279	1367	1627	615	1169	1167	1666	714	1279	1370	1627		636	42	1169	0	1325.5	317	1666	0	718	8	1279	0	1368.5	-3	1627	0
S006	651	1204	1465	1650	660	1321	1319	1655	694	1204	1178	1650	660	1321	1394	1655		672.5	-43	1204	0	1321.5	287	1650	0	660	0	1321	0	1356.5	-75	1655	0
S006	681	1254	1380	1733	739	1386	1371	1712	663	1254	1282	1733	735	1386	1403	1712		672	18	1254	0	1331	98	1733	0	737	4	1386	0	1387	-32	1712	0
S006	622	1237	1422	1779	707	1346	1393	1702	577	1237	1290	1779	681	1346	1406	1702		599.5	45	1237	0	1356	132	1779	0	694	26	1346	0	1399.5	-13	1702	0
S006	563	1181	1336	1709	726	1403	1371	1744	570	1181	1214	1709	699	1403	1420	1744		566.5	-7	1181	0	1275	122	1709	0	712.5	27	1403	0	1395.5	-49	1744	0
S006	608	1214	1395	1736	709	1392	1341	1698	592	1214	1259	1736	736	1392	1339	1698		600	16	1214	0	1327	136	1736	0	722.5	-27	1392	0	1340	2	1698	0
S006	730	1319	1570	1881	909	1732	1709	2074	683	1319	1422	1881	851	1732	1768	2074		706.5	47	1319	0	1496	148	1881	0	880	58	1732	0	1738.5	-59	2074	0
S006	663	1353	1564	2451	717	1536	1490	1904	665	1353	1437	2451	749	1536	1577	1904		664	-2	1353	0	1500.5	127	2451	0	733	-32	1536	0	1533.5	-87	1904	0
S006	235	931	1196	1567	836	1651	1588	2037	227	931	1114	1567	817	1651	1633	2037		231	8	931	0	1155	82	1567	0	826.5	19	1651	0	1610.5	-45	2037	0
S006	758	1410	1759	2082	862	1621	1635	2046	663	1410	1623	2082	850	1621	1647	2046		710.5	95	1410	0	1691	136	2082	0	856	12	1621	0	1641	-12	2046	0
S006	699	1377	1647	2055	859	1633	1598	2039	661	1377	1476	2055	832	1633	1665	2039		680	38	1377	0	1561.5	171	2055	0	845.5	27	1633	0	1631.5	-67	2039	0
S006	835	1484	1749	2108	849	1714	1649	2121	774	1484	1562	2108	796	1714	1728	2121		804.5	61	1484	0	1655.5	187	2108	0	822.5	53	1714	0	1688.5	-79	2121	0
S006	736	1453	1563	2048	906	1667	1665	2062	772	1453	1492	2048	889	1667	1774	2062		754	-36	1453	0	1527.5	71	2048	0	897.5	17	1667	0	1719.5	-109	2062	0
S007	624	1267	1341	1672	785	1359	1463	1773	613	1267	1200	1672	759	1359	1439	1773		618.5	11	1267	0	1270.5	141	1672	0	772	26	1359	0	1451	24	1773	0
S007	621	1256	1290	1645	706	1246	1335	1660	650	1256	1199	1645	696	1246	1229	1660		635.5	-29	1256	0	1244.5	91	1645	0	701	10	1246	0	1282	106	1660	0
S007	678	1313	1331	1725	691	1256	1328	1684	656	1313	1257	1725	676	1256	1303	1684		667	22	1313	0	1294	74	1725	0	683.5	15	1256	0	1315.5	25	1684	0
S007	533	1279	1372	1679	684	1248	1354	1702	577	1279	1234	1679	684	1248	1352	1702		555	-44	1279	0	1303	138	1679	0	684	0	1248	0	1353	2	1702	0
S007	750	1355	1443	1762	652	1287	1377	1712	687	1355	1289	1762	651	1287	1306	1712		718.5	63	1355	0	1366	154	1762	0	651.5	1	1287	0	1341.5	71	1712	0
S007	608	1318	1431	1728	714	1332	1351	1745	600	1318	1291	1728	707	1332	1343	1745		604	8	1318	0	1361	140	1728	0	710.5	7	1332	0	1347	8	1745	0
S007	671	1347	1493	1750	695	1331	1364	1766	678	1347	1296	1750	695	1331	1378	1766		674.5	-7	1347	0	1394.5	197	1750	0	695	0	1331	0	1371	-14	1766	0
S007	639	1312	1356	1727	695	1300	1324	1731	648	1312	1264	1727	686	1300	1330	1731		643.5	-9	1312	0	1310	92	1727	0	690.5	9	1300	0	1327	-6	1731	0
S007	734	1339	1412	1774	698	1357	1383	1716	739	1339	1240	1774	705	1357	1348	1716		736.5	-5	1339	0	1326	172	1774	0	701.5	-7	1357	0	1365.5	35	1716	0
S007	654	1352	1444	1837	707	1356	1409	1784	668	1352	1323	1837	711	1356	1335	1784		661	-14	1352	0	1383.5	121	1837	0	709	-4	1356	0	1372	74	1784	0
S007	810	1730	1993	2311	962	1868	2002	2473	800	1730	1811	2311	962	1868	1974	2473		805	10	1730	0	1902	182	2311	0	962	0	1868	0	1988	28	2473	0
S007	700	1519	1818	2054	855	1605	1758	2151	682	1519	1523	2054	841	1605	1729	2151		691	18	1519	0	1670.5	295	2054	0	848	14	1605	0	1743.5	29	2151	0
S007	711	1564	1750	2118	776	1545	1686	2048	728	1564	1629	2118	799	1545	1601	2048		719.5	-17	1564	0	1689.5	121	2118	0	787.5	-23	1545	0	1643.5	85	2048	0
S007	822	1675	1876	2242	828	1642	1774	2240	813	1675	1726	2242	860	1642	1823	2240		817.5	9	1675	0	1801	150	2242	0	844	-32	1642	0	1798.5	-49	2240	0
S007	752	1678	1763	2158	868	1680	1807	2192	733	1678	1630	2158	889	1680	1715	2192		742.5	19	1678	0	1696.5	133	2158	0	878.5	-21	1680	0	1761	92	2192	0
S007	781	1580	1612	2011	848	1591	1643	2101	726	1580	1494	2011	879	1591	1738	2101		753.5	55	1580	0	1553	118	2011	0	863.5	-31	1591	0	1690.5	-95	2101	0
S007	719	1656	1780	2160	768	1502	1628	2017	695	1656	1561	2160	774	1502	1659	2017		707	24	1656	0	1670.5	219	2160	0	771	-6	1502	0	1643.5	-31	2017	0
S008	532	1078	1137	1524	752	1237	1350	1606	517	1078	1048	1524	741	1237	1239	1606		524.5	15	1078	0	1092.5	89	1524	0	746.5	11	1237	0	1294.5	111	1606	0
S008	486	1043	1084	1456	706	1175	1250	1503	491	1043	1007	1456	695	1175	1194	1503		488.5	-5	1043	0	1045.5	77	1456	0	700.5	11	1175	0	1222	56	1503	0
S008	589	1065	1194	1547	688	1162	1219	1479	550	1065	1086	1547	699	1162	1187	1479		569.5	39	1065	0	1140	108	1547	0	693.5	-11	1162	0	1203	32	1479	0
S008	528	1043	1153	1504	721	1226	1299	1554	505	1043	1061	1504	717	1226	1294	1554		516.5	23	1043	0	1107	92	1504	0	719	4	1226	0	1296.5	5	1554	0
S008	563	1045	1167	1500	692	1210	1237	1526	524	1045	1066	1500	710	1210	1211	1526		543.5	39	1045	0	1116.5	101	1500	0	701	-18	1210	0	1224	26	1526	0
S008	608	1105	1247	1593	685	1231	1250	1556	574	1105	1114	1593	677	1231	1220	1556		591	34	1105	0	1180.5	133	1593	0	681	8	1231	0	1235	30	1556	0
S008	588	1068	1213	1579	715	1254	1266	1558	551	1068	1133	1579	727	1254	1276	1558		569.5	37	1068	0	1173	80	1579	0	721	-12	1254	0	1271	-10	1558	0
S008	595	1125	1321	1675	730	1299	1294	1620	581	1125	1166	1675	720	1299	1266	1620		588	14	1125	0	1243.5	155	1675	0	725	10	1299	0	1280	28	1620	0
S008	654	1172	1359	1721	743	1388	1375	1672	631	1172	1219	1721	756	1388	1348	1672		642.5	23	1172	0	1289	140	1721	0	749.5	-13	1388	0	1361.5	27	1672	0
S008	717	1353	1534	1964	924	1611	1660	2045	701	1353	1489	1964	910	1611	1593	2045		709	16	1353	0	1511.5	45	1964	0	917	14	1611	0	1626.5	67	2045	0
S008	608	1273	1570	1933	809	1458	1551	1905	619	1273	1485	1933	825	1458	1529	1905		613.5	-11	1273	0	1527.5	85	1933	0	817	-16	1458	0	1540	22	1905	0
S008	626	1291	1471	1857	802	1526	1592	1953	619	1291	1389	1857	819	1526	1595	1953		622.5	7	1291	0	1430	82	1857	0	810.5	-17	1526	0	1593.5	-3	1953	0
S008	673	1391	1640	2013	752	1458	1574	1920	658	1391	1461	2013	790	1458	1479	1920		665.5	15	1391	0	1550.5	179	2013	0	771	-38	1458	0	1526.5	95	1920	0
S008	638	1386	1654	2008	832	1473	1504	1962	634	1386	1461	2008	827	1473	1529	1962		636	4	1386	0	1557.5	193	2008	0	829.5	5	1473	0	1516.5	-25	1962	0
S008	695	1416	1533	2003	848	1520	1612	2002	671	1416	1485	2003	858	1520	1579	2002		683	24	1416	0	1509	48	2003	0	853	-10	1520	0	1595.5	33	2002	0
S009	655	1175	1211	1524	768	1334	1405	1664	670	1175	1193	1524	769	1334	1354	1664		662.5	-15	1175	0	1202	18	1524	0	768.5	-1	1334	0	1379.5	51	1664	0
S009	510	1105	1155	1458	660	1141	1241	1477	576	1105	1139	1458	667	1141	1161	1477		543	-66	1105	0	1147	16	1458	0	663.5	-7	1141	0	1201	80	1477	0
S009	511	1080	1164	1470	635	1088	1127	1414	514	1080	1105	1470	652	1088	1123	1414		512.5	-3	1080	0	1134.5	59	1470	0	643.5	-17	1088	0	1125	4	1414	0
S009	565	1100	1203	1488	680	1161	1253	1493	623	1100	1105	1488	707	1161	1164	1493		594	-58	1100	0	1154	98	1488	0	693.5	-27	1161	0	1208.5	89	1493	0
S009	618	1139	1255	1520	663	1176	1236	1538	622	1139	1165	1520	677	1176	1033	1538		620	-4	1139	0	1210	90	1520	0	670	-14	1176	0	1134.5	203	1538	0
S009	549	1123	1235	1507	657	1151	1246	1494	560	1123	1115	1507	684	1151	1182	1494		554.5	-11	1123	0	1175	120	1507	0	670.5	-27	1151	0	1214	64	1494	0
S009	583	1153	1284	1529	663	1164	1196	1511	569	1153	1125	1529	691	1164	1143	1511		576	14	1153	0	1204.5	159	1529	0	677	-28	1164	0	1169.5	53	1511	0
S009	586	1128	1191	1482	701	1179	1217	1525	550	1128	1144	1482	671	1179	1195	1525		568	36	1128	0	1167.5	47	1482	0	686	30	1179	0	1206	22	1525	0
S009	620	1133	1209	1502	684	1159	1144	1480	561	1133	1163	1502	642	1159	1140	1480		590.5	59	1133	0	1186	46	1502	0	663	42	1159	0	1142	4	1480	0
S009	578	1138	1239	1518	656	1151	1180	1485	563	1138	1131	1518	669	1151	1146	1485		570.5	15	1138	0	1185	108	1518	0	662.5	-13	1151	0	1163	34	1485	0
S009	568	1163	1269	1565	695	1197	1219	1546	595	1163	1192	1565	674	1197	1209	1546		581.5	-27	1163	0	1230.5	77	1565	0	684.5	21	1197	0	1214	10	1546	0
S009	654	1293	1461	1770	893	1502	1565	1923	653	1293	1381	1770	871	1502	1642	1923		653.5	1	1293	0	1421	80	1770	0	882	22	1502	0	1603.5	-77	1923	0
S009	652	1286	1391	1764	771	1331	1416	1775	653	1286	1352	1764	785	1331	1460	1775		652.5	-1	1286	0	1371.5	39	1764	0	778	-14	1331	0	1438	-44	1775	0
S009	642	1281	1482	1756	703	1364	1368	1749	628	1281	1368	1756	719	1364	1362	1749		635	14	1281	0	1425	114	1756	0	711	-16	1364	0	1365	6	1749	0
S009	606	1276	1460	1753	715	1337	1353	1747	633	1276	1340	1753	747	1337	1405	1747		619.5	-27	1276	0	1400	120	1753	0	731	-32	1337	0	1379	-52	1747	0
S009	668	1322	1535	1794	789	1365	1421	1790	676	1322	1432	1794	765	1365	1464	1790		672	-8	1322	0	1483.5	103	1794	0	777	24	1365	0	1442.5	-43	1790	0
S009	655	1279	1441	1745	740	1347	1385	1768	668	1279	1301	1745	782	1347	1415	1768		661.5	-13	1279	0	1371	140	1745	0	761	-42	1347	0	1400	-30	1768	0
S009	684	1330	1470	1807	746	1365	1377	1773	683	1330	1323	1807	749	1365	1414	1773		683.5	1	1330	0	1396.5	147	1807	0	747.5	-3	1365	0	1395.5	-37	1773	0
S009	664	1361	1504	1864	774	1376	1486	1817	667	1361	1477	1864	757	1376	1524	1817		665.5	-3	1361	0	1490.5	27	1864	0	765.5	17	1376	0	1505	-38	1817	0
S010	551	1143	1204	1564	750	1351	1250	1608	540	1143	1212	1564	738	1351	1349	1608		545.5	11	1143	0	1208	-8	1564	0	744	12	1351	0	1299.5	-99	1608	0
S010	632	1214	1333	1666	699	1365	1392	1679	674	1214	1227	1666	697	1365	1319	1679		653	-42	1214	0	1280	106	1666	0	698	2	1365	0	1355.5	73	1679	0
S010	667	1202	1393	1660	697	1338	1351	1646	689	1202	1295	1660	678	1338	1358	1646		678	-22	1202	0	1344	98	1660	0	687.5	19	1338	0	1354.5	-7	1646	0
S010	652	1174	1217	1630	737	1329	1317	1636	687	1174	1167	1630	723	1329	1291	1636		669.5	-35	1174	0	1192	50	1630	0	730	14	1329	0	1304	26	1636	0
S010	627	1195	1353	1672	665	1333	1327	1655	693	1195	1193	1672	685	1333	1296	1655		660	-66	1195	0	1273	160	1672	0	675	-20	1333	0	1311.5	31	1655	0
S010	673	1206	1350	1660	728	1356	1317	1687	697	1206	1332	1660	727	1356	1374	1687		685	-24	1206	0	1341	18	1660	0	727.5	1	1356	0	1345.5	-57	1687	0
S010	634	1214	1392	1718	694	1338	1323	1652	689	1214	1436	1718	675	1338	1312	1652		661.5	-55	1214	0	1414	-44	1718	0	684.5	19	1338	0	1317.5	11	1652	0
S010	642	1155	1360	1683	728	1378	1341	1673	636	1155	1343	1683	739	1378	1409	1673		639	6	1155	0	1351.5	17	1683	0	733.5	-11	1378	0	1375	-68	1673	0
S010	669	1229	1467	1803	732	1444	1377	1743	656	1229	1456	1803	763	1444	1454	1743		662.5	13	1229	0	1461.5	11	1803	0	747.5	-31	1444	0	1415.5	-77	1743	0
S010	672	1227	1503	1868	771	1501	1465	1748	676	1227	1494	1868	804	1501	1444	1748		674	-4	1227	0	1498.5	9	1868	0	787.5	-33	1501	0	1454.5	21	1748	0
S010	722	1320	1642	1967	903	1742	1701	2074	737	1320	1667	1967	915	1742	1637	2074		729.5	-15	1320	0	1654.5	-25	1967	0	909	-12	1742	0	1669	64	2074	0
S010	667	1335	1771	2042	765	1632	1595	1983	628	1335	1712	2042	774	1632	1668	1983		647.5	39	1335	0	1741.5	59	2042	0	769.5	-9	1632	0	1631.5	-73	1983	0
S010	697	1382	1778	2093	838	1693	1725	2068	680	1382	1759	2093	828	1693	1728	2068		688.5	17	1382	0	1768.5	19	2093	0	833	10	1693	0	1726.5	-3	2068	0
S010	709	1420	1644	1966	843	1730	1714	2146	693	1420	1555	1966	842	1730	1703	2146		701	16	1420	0	1599.5	89	1966	0	842.5	1	1730	0	1708.5	11	2146	0
S010	759	1404	1807	2071	737	1609	1584	1957	752	1404	1709	2071	758	1609	1678	1957		755.5	7	1404	0	1758	98	2071	0	747.5	-21	1609	0	1631	-94	1957	0
S010	680	1354	1696	2019	812	1630	1602	1968	688	1354	1573	2019	839	1630	1624	1968		684	-8	1354	0	1634.5	123	2019	0	825.5	-27	1630	0	1613	-22	1968	0
S010	661	1374	1766	2052	852	1700	1747	2035	670	1374	1767	2052	866	1700	1761	2035		665.5	-9	1374	0	1766.5	-1	2052	0	859	-14	1700	0	1754	-14	2035	0
S010	714	1409	1754	2125	866	1697	1737	2097	730	1409	1727	2125	850	1697	1723	2097		722	-16	1409	0	1740.5	27	2125	0	858	16	1697	0	1730	14	2097	0
S011	572	1157	1210	1556	746	1349	1348	1653	563	1157	1280	1556	763	1349	1366	1653		567.5	9	1157	0	1245	-70	1556	0	754.5	-17	1349	0	1357	-18	1653	0
S011	521	1107	1159	1494	648	1238	1236	1514	577	1107	1141	1494	690	1238	1226	1514		549	-56	1107	0	1150	18	1494	0	669	-42	1238	0	1231	10	1514	0
S011	547	1092	1235	1502	618	1213	1199	1485	580	1092	1243	1502	635	1213	1212	1485		563.5	-33	1092	0	1239	-8	1502	0	626.5	-17	1213	0	1205.5	-13	1485	0
S011	608	1128	1224	1526	639	1227	1198	1535	598	1128	1185	1526	675	1227	1268	1535		603	10	1128	0	1204.5	39	1526	0	657	-36	1227	0	1233	-70	1535	0
S011	630	1141	1175	1547	638	1231	1268	1546	619	1141	1159	1547	637	1231	1274	1546		624.5	11	1141	0	1167	16	1547	0	637.5	1	1231	0	1271	-6	1546	0
S011	595	1156	1190	1593	611	1200	1256	1545	603	1156	1235	1593	639	1200	1200	1545		599	-8	1156	0	1212.5	-45	1593	0	625	-28	1200	0	1228	56	1545	0
S011	630	1126	1232	1566	651	1286	1260	1575	617	1126	1279	1566	663	1286	1319	1575		623.5	13	1126	0	1255.5	-47	1566	0	657	-12	1286	0	1289.5	-59	1575	0
S011	591	1111	1207	1557	674	1271	1262	1529	593	1111	1213	1557	668	1271	1189	1529		592	-2	1111	0	1210	-6	1557	0	671	6	1271	0	1225.5	73	1529	0
S011	582	1114	1263	1556	679	1306	1296	1586	583	1114	1334	1556	692	1306	1283	1586		582.5	-1	1114	0	1298.5	-71	1556	0	685.5	-13	1306	0	1289.5	13	1586	0
S011	653	1263	1399	1701	649	1286	1265	1590	635	1263	1347	1701	647	1286	1279	1590		644	18	1263	0	1373	52	1701	0	648	2	1286	0	1272	-14	1590	0
S011	725	1333	1597	1865	921	1696	1768	2056	726	1333	1445	1865	950	1696	1754	2056		725.5	-1	1333	0	1521	152	1865	0	935.5	-29	1696	0	1761	14	2056	0
S011	673	1358	1633	1964	690	1467	1574	1843	687	1358	1530	1964	729	1467	1552	1843		680	-14	1358	0	1581.5	103	1964	0	709.5	-39	1467	0	1563	22	1843	0
S011	704	1325	1601	1910	779	1580	1663	1939	665	1325	1516	1910	818	1580	1635	1939		684.5	39	1325	0	1558.5	85	1910	0	798.5	-39	1580	0	1649	28	1939	0
S011	719	1330	1610	1852	784	1541	1594	1921	706	1330	1484	1852	796	1541	1610	1921		712.5	13	1330	0	1547	126	1852	0	790	-12	1541	0	1602	-16	1921	0
S011	730	1457	1734	2021	701	1504	1611	1965	718	1457	1678	2021	749	1504	1651	1965		724	12	1457	0	1706	56	2021	0	725	-48	1504	0	1631	-40	1965	0
S011	767	1397	1701	1975	775	1577	1609	1930	754	1397	1631	1975	822	1577	1697	1930		760.5	13	1397	0	1666	70	1975	0	798.5	-47	1577	0	1653	-88	1930	0
S011	736	1489	1608	2000	795	1573	1655	1975	740	1489	1631	2000	829	1573	1705	1975		738	-4	1489	0	1619.5	-23	2000	0	812	-34	1573	0	1680	-50	1975	0
S012	618	1140	1292	1559	721	1276	1280	1601	605	1140	1183	1559	705	1276	1228	1601		611.5	13	1140	0	1237.5	109	1559	0	713	16	1276	0	1254	52	1601	0
S012	593	1091	1167	1478	683	1199	1292	1533	587	1091	1137	1478	700	1199	1140	1533		590	6	1091	0	1152	30	1478	0	691.5	-17	1199	0	1216	152	1533	0
S012	671	1161	1244	1556	669	1199	1228	1542	663	1161	1269	1556	680	1199	1175	1542		667	8	1161	0	1256.5	-25	1556	0	674.5	-11	1199	0	1201.5	53	1542	0
S012	656	1177	1222	1577	640	1231	1249	1572	621	1177	1226	1577	665	1231	1202	1572		638.5	35	1177	0	1224	-4	1577	0	652.5	-25	1231	0	1225.5	47	1572	0
S012	663	1172	1344	1627	659	1222	1247	1560	667	1172	1272	1627	675	1222	1212	1560		665	-4	1172	0	1308	72	1627	0	667	-16	1222	0	1229.5	35	1560	0
S012	656	1179	1273	1602	691	1281	1279	1643	636	1179	1283	1602	697	1281	1220	1643		646	20	1179	0	1278	-10	1602	0	694	-6	1281	0	1249.5	59	1643	0
S012	624	1168	1226	1561	661	1260	1284	1577	616	1168	1235	1561	678	1260	1255	1577		620	8	1168	0	1230.5	-9	1561	0	669.5	-17	1260	0	1269.5	29	1577	0
S012	604	1183	1350	1639	639	1251	1342	1610	610	1183	1270	1639	669	1251	1316	1610		607	-6	1183	0	1310	80	1639	0	654	-30	1251	0	1329	26	1610	0
S012	672	1191	1281	1659	642	1278	1223	1620	635	1191	1323	1659	655	1278	1233	1620		653.5	37	1191	0	1302	-42	1659	0	648.5	-13	1278	0	1228	-10	1620	0
S012	590	1219	1407	1715	692	1310	1337	1657	600	1219	1301	1715	686	1310	1332	1657		595	-10	1219	0	1354	106	1715	0	689	6	1310	0	1334.5	5	1657	0
S012	775	1526	1791	2152	906	1749	1897	2221	814	1526	1850	2152	934	1749	1909	2221		794.5	-39	1526	0	1820.5	-59	2152	0	920	-28	1749	0	1903	-12	2221	0
S012	743	1337	1533	1855	868	1627	1652	2037	697	1337	1564	1855	892	1627	1638	2037		720	46	1337	0	1548.5	-31	1855	0	880	-24	1627	0	1645	14	2037	0
S012	720	1316	1591	1820	738	1407	1541	1797	684	1316	1502	1820	733	1407	1491	1797		702	36	1316	0	1546.5	89	1820	0	735.5	5	1407	0	1516	50	1797	0
S012	712	1349	1496	1845	766	1435	1506	1804	681	1349	1512	1845	777	1435	1464	1804		696.5	31	1349	0	1504	-16	1845	0	771.5	-11	1435	0	1485	42	1804	0
S012	693	1349	1615	1870	775	1493	1471	1898	690	1349	1581	1870	779	1493	1525	1898		691.5	3	1349	0	1598	34	1870	0	777	-4	1493	0	1498	-54	1898	0
S012	742	1418	1639	1907	771	1481	1518	1890	674	1418	1601	1907	783	1481	1505	1890		708	68	1418	0	1620	38	1907	0	777	-12	1481	0	1511.5	13	1890	0
S012	786	1487	1770	2043	800	1528	1522	1947	789	1487	1716	2043	807	1528	1590	1947		787.5	-3	1487	0	1743	54	2043	0	803.5	-7	1528	0	1556	-68	1947	0
S013	628	1127	1209	1617	816	1415	1425	1743	653	1127	1258	1617	805	1415	1465	1743		640.5	-25	1127	0	1233.5	-49	1617	0	810.5	11	1415	0	1445	-40	1743	0
S013	631	1141	1269	1644	722	1251	1338	1623	632	1141	1210	1644	713	1251	1304	1623		631.5	-1	1141	0	1239.5	59	1644	0	717.5	9	1251	0	1321	34	1623	0
S013	621	1108	1310	1605	726	1240	1299	1606	625	1108	1285	1605	754	1240	1277	1606		623	-4	1108	0	1297.5	25	1605	0	740	-28	1240	0	1288	22	1606	0
S013	572	1152	1282	1645	747	1302	1285	1660	575	1152	1318	1645	744	1302	1295	1660		573.5	-3	1152	0	1300	-36	1645	0	745.5	3	1302	0	1290	-10	1660	0
S013	690	1156	1300	1676	757	1288	1324	1644	649	1156	1323	1676	735	1288	1327	1644		669.5	41	1156	0	1311.5	-23	1676	0	746	22	1288	0	1325.5	-3	1644	0
S013	613	1128	1237	1636	748	1275	1307	1646	638	1128	1216	1636	756	1275	1320	1646		625.5	-25	1128	0	1226.5	21	1636	0	752	-8	1275	0	1313.5	-13	1646	0
S013	654	1159	1357	1688	743	1310	1346	1674	653	1159	1286	1688	747	1310	1339	1674		653.5	1	1159	0	1321.5	71	1688	0	745	-4	1310	0	1342.5	7	1674	0
S013	644	1193	1418	1731	783	1337	1356	1709	685	1193	1262	1731	738	1337	1343	1709		664.5	-41	1193	0	1340	156	1731	0	760.5	45	1337	0	1349.5	13	1709	0
S013	633	1246	1407	1833	773	1367	1403	1752	673	1246	1334	1833	803	1367	1409	1752		653	-40	1246	0	1370.5	73	1833	0	788	-30	1367	0	1406	-6	1752	0
S013	731	1273	1459	1831	967	1660	1707	2089	750	1273	1460	1831	977	1660	1736	2089		740.5	-19	1273	0	1459.5	-1	1831	0	972	-10	1660	0	1721.5	-29	2089	0
S013	694	1250	1466	1813	747	1399	1437	1761	701	1250	1435	1813	802	1399	1464	1761		697.5	-7	1250	0	1450.5	31	1813	0	774.5	-55	1399	0	1450.5	-27	1761	0
S013	688	1228	1396	1788	824	1405	1463	1810	693	1228	1380	1788	871	1405	1509	1810		690.5	-5	1228	0	1388	16	1788	0	847.5	-47	1405	0	1486	-46	1810	0
S013	725	1327	1471	1876	801	1456	1541	1865	711	1327	1481	1876	831	1456	1456	1865		718	14	1327	0	1476	-10	1876	0	816	-30	1456	0	1498.5	85	1865	0
S013	743	1322	1477	1902	818	1462	1533	1888	785	1322	1423	1902	831	1462	1578	1888		764	-42	1322	0	1450	54	1902	0	824.5	-13	1462	0	1555.5	-45	1888	0
S013	648	1278	1494	1868	793	1404	1464	1818	653	1278	1459	1868	797	1404	1495	1818		650.5	-5	1278	0	1476.5	35	1868	0	795	-4	1404	0	1479.5	-31	1818	0
S013	737	1393	1596	2027	838	1504	1559	1974	759	1393	1578	2027	845	1504	1471	1974		748	-22	1393	0	1587	18	2027	0	841.5	-7	1504	0	1515	88	1974	0
S014	695	1139	1240	1530	745	1261	1390	1653	680	1139	1245	1530	774	1261	1351	1653		687.5	15	1139	0	1242.5	-5	1530	0	759.5	-29	1261	0	1370.5	39	1653	0
S014	656	1130	1237	1537	654	1113	1235	1516	664	1130	1228	1537	648	1113	1225	1516		660	-8	1130	0	1232.5	9	1537	0	651	6	1113	0	1230	10	1516	0
S014	667	1160	1241	1566	665	1134	1289	1558	709	1160	1218	1566	672	1134	1237	1558		688	-42	1160	0	1229.5	23	1566	0	668.5	-7	1134	0	1263	52	1558	0
S014	678	1178	1252	1574	663	1156	1322	1583	670	1178	1220	1574	697	1156	1302	1583		674	8	1178	0	1236	32	1574	0	680	-34	1156	0	1312	20	1583	0
S014	681	1158	1219	1576	664	1129	1230	1546	664	1158	1201	1576	668	1129	1274	1546		672.5	17	1158	0	1210	18	1576	0	666	-4	1129	0	1252	-44	1546	0
S014	697	1171	1249	1571	681	1148	1305	1581	712	1171	1262	1571	718	1148	1296	1581		704.5	-15	1171	0	1255.5	-13	1571	0	699.5	-37	1148	0	1300.5	9	1581	0
S014	732	1196	1255	1597	684	1171	1308	1595	709	1196	1314	1597	692	1171	1283	1595		720.5	23	1196	0	1284.5	-59	1597	0	688	-8	1171	0	1295.5	25	1595	0
S014	669	1189	1271	1588	645	1172	1326	1591	653	1189	1286	1588	679	1172	1325	1591		661	16	1189	0	1278.5	-15	1588	0	662	-34	1172	0	1325.5	1	1591	0
S014	729	1231	1382	1698	674	1186	1312	1618	730	1231	1362	1698	684	1186	1303	1618		729.5	-1	1231	0	1372	20	1698	0	679	-10	1186	0	1307.5	9	1618	0
S014	680	1237	1461	1734	719	1255	1357	1692	682	1237	1425	1734	744	1255	1322	1692		681	-2	1237	0	1443	36	1734	0	731.5	-25	1255	0	1339.5	35	1692	0
S014	845	1445	1617	1957	944	1627	1759	2165	857	1445	1627	1957	967	1627	1774	2165		851	-12	1445	0	1622	-10	1957	0	955.5	-23	1627	0	1766.5	-15	2165	0
S014	795	1390	1623	1919	748	1388	1538	1900	778	1390	1608	1919	776	1388	1535	1900		786.5	17	1390	0	1615.5	15	1919	0	762	-28	1388	0	1536.5	3	1900	0
S014	764	1380	1623	1898	768	1369	1464	1889	797	1380	1579	1898	790	1369	1464	1889		780.5	-33	1380	0	1601	44	1898	0	779	-22	1369	0	1464	0	1889	0
S014	773	1408	1488	1901	779	1400	1582	1897	789	1408	1463	1901	791	1400	1550	1897		781	-16	1408	0	1475.5	25	1901	0	785	-12	1400	0	1566	32	1897	0
S014	747	1373	1563	1878	776	1351	1454	1868	741	1373	1548	1878	796	1351	1543	1868		744	6	1373	0	1555.5	15	1878	0	786	-20	1351	0	1498.5	-89	1868	0
S014	739	1384	1504	1927	815	1370	1562	1901	777	1384	1500	1927	794	1370	1565	1901		758	-38	1384	0	1502	4	1927	0	804.5	21	1370	0	1563.5	-3	1901	0
S014	769	1428	1647	1988	783	1433	1636	1953	801	1428	1643	1988	807	1433	1614	1953		785	-32	1428	0	1645	4	1988	0	795	-24	1433	0	1625	22	1953	0
S015	497	1077	1223	1539	793	1392	1398	1726	521	1077	1202	1539	784	1392	1419	1726		509	-24	1077	0	1212.5	21	1539	0	788.5	9	1392	0	1408.5	-21	1726	0
S015	579	1148	1288	1576	656	1246	1285	1595	498	1148	1210	1576	668	1246	1272	1595		538.5	81	1148	0	1249	78	1576	0	662	-12	1246	0	1278.5	13	1595	0
S015	616	1183	1333	1674	649	1254	1295	1604	563	1183	1244	1674	652	1254	1271	1604		589.5	53	1183	0	1288.5	89	1674	0	650.5	-3	1254	0	1283	24	1604	0
S015	546	1155	1313	1631	683	1289	1352	1634	529	1155	1257	1631	704	1289	1369	1634		537.5	17	1155	0	1285	56	1631	0	693.5	-21	1289	0	1360.5	-17	1634	0
S015	577	1206	1423	1741	678	1317	1307	1656	663	1206	1297	1741	695	1317	1314	1656		620	-86	1206	0	1360	126	1741	0	686.5	-17	1317	0	1310.5	-7	1656	0
S015	570	1164	1312	1672	715	1377	1336	1720	562	1164	1274	1672	726	1377	1391	1720		566	8	1164	0	1293	38	1672	0	720.5	-11	1377	0	1363.5	-55	1720	0
S015	615	1196	1390	1751	705	1350	1382	1709	670	1196	1444	1751	724	1350	1389	1709		642.5	-55	1196	0	1417	-54	1751	0	714.5	-19	1350	0	1385.5	-7	1709	0
S015	647	1203	1380	1766	738	1405	1367	1770	684	1203	1287	1766	717	1405	1414	1770		665.5	-37	1203	0	1333.5	93	1766	0	727.5	21	1405	0	1390.5	-47	1770	0
S015	631	1224	1413	1771	702	1390	1355	1771	682	1224	1317	1771	743	1390	1377	1771		656.5	-51	1224	0	1365	96	1771	0	722.5	-41	1390	0	1366	-22	1771	0
S015	610	1207	1368	1780	721	1400	1318	1728	552	1207	1279	1780	736	1400	1340	1728		581	58	1207	0	1323.5	89	1780	0	728.5	-15	1400	0	1329	-22	1728	0
S015	610	1321	1571	1989	937	1746	1744	2154	621	1321	1614	1989	955	1746	1819	2154		615.5	-11	1321	0	1592.5	-43	1989	0	946	-18	1746	0	1781.5	-75	2154	0
S015	637	1282	1491	1880	779	1528	1552	1968	566	1282	1559	1880	749	1528	1535	1968		601.5	71	1282	0	1525	-68	1880	0	764	30	1528	0	1543.5	17	1968	0
S015	639	1306	1519	1997	760	1462	1473	1898	569	1306	1666	1997	780	1462	1502	1898		604	70	1306	0	1592.5	-147	1997	0	770	-20	1462	0	1487.5	-29	1898	0
S015	665	1341	1511	1985	791	1548	1591	2006	610	1341	1577	1985	804	1548	1629	2006		637.5	55	1341	0	1544	-66	1985	0	797.5	-13	1548	0	1610	-38	2006	0
S015	642	1362	1569	2033	794	1550	1682	2011	637	1362	1682	2033	810	1550	1674	2011		639.5	5	1362	0	1625.5	-113	2033	0	802	-16	1550	0	1678	8	2011	0
S015	726	1431	1600	2029	800	1589	1700	2096	681	1431	1661	2029	823	1589	1739	2096		703.5	45	1431	0	1630.5	-61	2029	0	811.5	-23	1589	0	1719.5	-39	2096	0
S015	720	1425	1714	2159	794	1543	1593	2006	677	1425	1760	2159	843	1543	1629	2006		698.5	43	1425	0	1737	-46	2159	0	818.5	-49	1543	0	1611	-36	2006	0

## Sheet: Straight_ICC(1,1)_Tomita
Skater No.	Straight_R_onset_tomita_1	Straight_R_TurnBack_tomita_1	Straight_R_PushOn_tomita_1	Straight_R_PushOff_tomita_1	Straight_R_OffSet_tomita_1	Straight_L_onset_tomita_1	Straight_L_TurnBack_tomita_1	Straight_L_PushOn_tomita_1	Straight_L_PushOff_tomita_1	Straight_L_OffSet_tomita_1	Straight_R_onset_tomita_2	Straight_R_TurnBack_tomita_2	Straight_R_PushOn_tomita_2	Straight_R_PushOff_tomita_2	Straight_R_OffSet_tomita_2	Straight_L_onset_tomita_2	Straight_L_TurnBack_tomita_2	Straight_L_PushOn_tomita_2	Straight_L_PushOff_tomita_2	Straight_L_OffSet_tomita_2		Straight_R_onset_tomita_mean	Straight_R_onset_tomita_diff	Straight_R_TurnBack_tomita_mean	Straight_R_TurnBack_tomita_diff	Straight_R_PushOn_tomita_mean	Straight_R_PushOn_tomita_diff	Straight_R_PushOff_tomita_mean	Straight_R_PushOff_tomita_diff	Straight_R_OffSet_tomita_mean	Straight_R_OffSet_tomita_diff	Straight_L_onset_tomita_mean	Straight_L_onset_tomita_diff	Straight_L_TurnBack_tomita_mean	Straight_L_TurnBack_tomita_diff	Straight_L_PushOn_tomita_mean	Straight_L_PushOn_tomita_diff	Straight_L_PushOff_tomita_mean	Straight_L_PushOff_tomita_diff	Straight_L_OffSet_tomita_mean	Straight_L_OffSet_tomita_diff
S001	787	1260	1582	1618	1981	765	1118	1405	1476	1890	788	1293	1582	1618	1981	777	1127	1405	1476	1890		787.5	-1	1276.5	-33	1582	0	1618	0	1981	0	771	-12	1122.5	-9	1405	0	1476	0	1890	0
S001	796	1314	1645	1672	2103	826	1253	1514	1620	2041	817	1347	1645	1672	2103	838	1247	1514	1620	2041		806.5	-21	1330.5	-33	1645	0	1672	0	2103	0	832	-12	1250	6	1514	0	1620	0	2041	0
S001	792	1311	1638	1735	2114	842	1230	1557	1722	2085	796	1338	1638	1723	2114	855	1228	1557	1722	2085		794	-4	1324.5	-27	1638	0	1729	12	2114	0	848.5	-13	1229	2	1557	0	1722	0	2085	0
S001	806	1356	1662	1740	2164	764	1311	1612	1719	2125	813	1379	1662	1704	2164	756	1286	1612	1719	2125		809.5	-7	1367.5	-23	1662	0	1722	36	2164	0	760	8	1298.5	25	1612	0	1719	0	2125	0
S001	886	1482	1821	1960	2403	880	1384	1685	1881	2249	888	1478	1821	1960	2403	882	1376	1685	1857	2249		887	-2	1480	4	1821	0	1960	0	2403	0	881	-2	1380	8	1685	0	1869	24	2249	0
S001	892	1238	1769	1940	2305	981	1595	1856	2016	2389	893	1242	1769	1832	2305	981	1547	1856	1980	2389		892.5	-1	1240	-4	1769	0	1886	108	2305	0	981	0	1571	48	1856	0	1998	36	2389	0
S001	871	1433	1769	1865	2249	808	1161	1521	1692	2067	859	1435	1769	1848	2249	798	1142	1521	1718	2067		865	12	1434	-2	1769	0	1856.5	17	2249	0	803	10	1151.5	19	1521	0	1705	-26	2067	0
S001	895	1457	1834	1912	2368	911	1400	1730	1921	2311	897	1439	1834	1921	2368	915	1396	1730	1947	2311		896	-2	1448	18	1834	0	1916.5	-9	2368	0	913	-4	1398	4	1730	0	1934	-26	2311	0
S001	901	1453	1812	1883	2357	929	1438	1768	1914	2362	722	1453	1812	1926	2357	943	1424	1768	1957	2362		811.5	179	1453	0	1812	0	1904.5	-43	2357	0	936	-14	1431	14	1768	0	1935.5	-43	2362	0
S001	883	1558	1961	2105	2600	938	1362	1771	1960	2388	901	1572	1961	2114	2600	945	1341	1771	1968	2388		892	-18	1565	-14	1961	0	2109.5	-9	2600	0	941.5	-7	1351.5	21	1771	0	1964	-8	2388	0
S002	845	1526	1750	1805	2223	706	1124	1505	1619	2021	848	1526	1750	1790	2223	722	1124	1505	1635	2021		846.5	-3	1526	0	1750	0	1797.5	15	2223	0	714	-16	1124	0	1505	0	1627	-16	2021	0
S002	851	1563	1772	1919	2270	898	1254	1731	1812	2238	887	1548	1772	1904	2270	898	1301	1731	1796	2238		869	-36	1555.5	15	1772	0	1911.5	15	2270	0	898	0	1277.5	-47	1731	0	1804	16	2238	0
S002	918	1568	1828	1924	2354	889	1261	1767	1864	2302	916	1568	1828	1940	2354	874	1276	1767	1895	2302		917	2	1568	0	1828	0	1932	-16	2354	0	881.5	15	1268.5	-15	1767	0	1879.5	-31	2302	0
S002	870	1520	1787	1907	2342	909	1234	1787	1946	2327	908	1505	1787	1938	2342	893	1249	1787	1884	2327		889	-38	1512.5	15	1787	0	1922.5	-31	2342	0	901	16	1241.5	-15	1787	0	1915	62	2327	0
S002	912	1562	1847	2011	2411	934	1399	1830	1925	2380	937	1562	1847	2011	2411	919	1368	1830	1940	2380		924.5	-25	1562	0	1847	0	2011	0	2411	0	926.5	15	1383.5	31	1830	0	1932.5	-15	2380	0
S002	962	1565	1916	2092	2481	1046	1387	1869	1975	2420	958	1581	1916	2030	2481	969	1371	1869	2021	2420		960	4	1573	-16	1916	0	2061	62	2481	0	1007.5	77	1379	16	1869	0	1998	-46	2420	0
S002	895	1545	1915	2071	2434	994	1427	1937	2047	2491	932	1561	1915	2025	2434	1010	1427	1937	2093	2491		913.5	-37	1553	-16	1915	0	2048	46	2434	0	1002	-16	1427	0	1937	0	2070	-46	2491	0
S002	939	1769	2057	2191	2599	747	1240	1673	1926	2319	915	1793	2057	2167	2599	747	1228	1673	1878	2319		927	24	1781	-24	2057	0	2179	24	2599	0	747	0	1234	12	1673	0	1902	48	2319	0
S002	940	1674	2005	2180	2588	980	1509	2009	2207	2573	940	1686	2005	2156	2588	980	1557	2009	2171	2573		940	0	1680	-12	2005	0	2168	24	2588	0	980	0	1533	-48	2009	0	2189	36	2573	0
S002	928	1710	2022	2192	2652	983	1524	2031	2174	2604	940	1710	2022	2180	2652	971	1548	2031	2174	2604		934	-12	1710	0	2022	0	2186	12	2652	0	977	12	1536	-24	2031	0	2174	0	2604	0
S002	852	1671	2005	2248	2675	979	1460	2036	2279	2642	900	1659	2005	2224	2675	979	1484	2036	2291	2642		876	-48	1665	12	2005	0	2236	24	2675	0	979	0	1472	-24	2036	0	2285	-12	2642	0
S002	934	1752	2079	2258	2679	1057	1467	2116	2261	2719	958	1740	2079	2210	2679	1069	1479	2116	2249	2719		946	-24	1746	12	2079	0	2234	48	2679	0	1063	-12	1473	-12	2116	0	2255	12	2719	0
S003	889	1743	1862	2006	2353	709	1311	1719	1739	2228	974	1761	1862	2045	2353	745	1300	1719	1816	2228		931.5	-85	1752	-18	1862	0	2025.5	-39	2353	0	727	-36	1305.5	11	1719	0	1777.5	-77	2228	0
S003	861	1670	1833	1885	2343	859	1449	1809	1922	2327	891	1704	1833	1923	2343	891	1445	1809	1858	2327		876	-30	1687	-34	1833	0	1904	-38	2343	0	875	-32	1447	4	1809	0	1890	64	2327	0
S003	880	1549	1732	1966	2366	853	1466	1790	1891	2255	896	1566	1732	1915	2366	872	1453	1790	1878	2255		888	-16	1557.5	-17	1732	0	1940.5	51	2366	0	862.5	-19	1459.5	13	1790	0	1884.5	13	2255	0
S003	885	1671	1912	2115	2589	912	1539	1907	2035	2447	903	1690	1912	2090	2589	952	1532	1907	2100	2447		894	-18	1680.5	-19	1912	0	2102.5	25	2589	0	932	-40	1535.5	7	1907	0	2067.5	-65	2447	0
S003	961	1841	2084	2286	2770	986	1746	2123	2297	2713	984	1822	2084	2312	2770	1020	1755	2123	2271	2713		972.5	-23	1831.5	19	2084	0	2299	-26	2770	0	1003	-34	1750.5	-9	2123	0	2284	26	2713	0
S003	837	1627	1981	2186	2573	1067	1857	2125	2202	2635	871	1645	1981	2225	2573	1080	1841	2125	2189	2635		854	-34	1636	-18	1981	0	2205.5	-39	2573	0	1073.5	-13	1849	16	2125	0	2195.5	13	2635	0
S003	1003	1880	2125	2366	2718	873	1850	2072	2180	2665	1024	1891	2125	2386	2718	890	1860	2072	2170	2665		1013.5	-21	1885.5	-11	2125	0	2376	-20	2718	0	881.5	-17	1855	-10	2072	0	2175	10	2665	0
S003	1025	1938	2168	2392	2810	981	1779	2174	2249	2717	1030	1938	2168	2392	2810	1011	1775	2174	2280	2717		1027.5	-5	1938	0	2168	0	2392	0	2810	0	996	-30	1777	4	2174	0	2264.5	-31	2717	0
S003	991	1817	2093	2203	2752	1092	1811	2209	2184	2729	1017	1811	2093	2275	2752	1111	1792	2209	2174	2729		1004	-26	1814	6	2093	0	2239	-72	2752	0	1101.5	-19	1801.5	19	2209	0	2179	10	2729	0
S003	1024	1895	2139	2371	2854	1039	1862	2261	2282	2837	1030	1897	2139	2371	2854	1075	1838	2261	2323	2837		1027	-6	1896	-2	2139	0	2371	0	2854	0	1057	-36	1850	24	2261	0	2302.5	-41	2837	0
S004	801	1406	1553	1668	2047	735	1277	1513	1560	1987	787	1406	1553	1682	2047	748	1264	1513	1560	1987		794	14	1406	0	1553	0	1675	-14	2047	0	741.5	-13	1270.5	13	1513	0	1560	0	1987	0
S004	859	1423	1562	1643	2066	799	1302	1572	1573	2054	831	1423	1562	1616	2066	799	1302	1572	1573	2054		845	28	1423	0	1562	0	1629.5	27	2066	0	799	0	1302	0	1572	0	1573	0	2054	0
S004	870	1476	1605	1778	2122	821	1286	1580	1569	2087	898	1489	1605	1682	2122	821	1298	1580	1621	2087		884	-28	1482.5	-13	1605	0	1730	96	2122	0	821	0	1292	-12	1580	0	1595	-52	2087	0
S004	867	1459	1662	1720	2152	850	1314	1641	1649	2156	853	1459	1662	1747	2152	850	1314	1641	1701	2156		860	14	1459	0	1662	0	1733.5	-27	2152	0	850	0	1314	0	1641	0	1675	-52	2156	0
S004	875	1480	1660	1783	2178	847	1350	1640	1750	2136	861	1494	1660	1769	2178	847	1350	1640	1763	2136		868	14	1487	-14	1660	0	1776	14	2178	0	847	0	1350	0	1640	0	1756.5	-13	2136	0
S004	884	1517	1725	1806	2256	891	1368	1685	1742	2208	884	1517	1725	1792	2256	865	1407	1685	1742	2208		884	0	1517	0	1725	0	1799	14	2256	0	878	26	1387.5	-39	1685	0	1742	0	2208	0
S004	940	1504	1836	2054	2391	914	1534	1759	1933	2338	953	1504	1836	2081	2391	914	1546	1759	1882	2338		946.5	-13	1504	0	1836	0	2067.5	-27	2391	0	914	0	1540	-12	1759	0	1907.5	51	2338	0
S004	985	1767	1880	1972	2412	826	1373	1735	1734	2338	889	1731	1880	1972	2412	826	1383	1735	1847	2338		937	96	1749	36	1880	0	1972	0	2412	0	826	0	1378	-10	1735	0	1790.5	-113	2338	0
S004	908	1462	1753	1919	2320	902	1563	1811	1924	2295	908	1486	1753	1907	2320	923	1573	1811	1841	2295		908	0	1474	-24	1753	0	1913	12	2320	0	912.5	-21	1568	-10	1811	0	1882.5	83	2295	0
S004	936	1598	1828	1959	2400	939	1476	1833	1837	2364	899	1586	1828	1995	2400	939	1455	1833	1878	2364		917.5	37	1592	12	1828	0	1977	-36	2400	0	939	0	1465.5	21	1833	0	1857.5	-41	2364	0
S004	883	1521	1803	1918	2370	959	1485	1841	1939	2397	895	1521	1803	1846	2370	959	1474	1841	1918	2397		889	-12	1521	0	1803	0	1882	72	2370	0	959	0	1479.5	11	1841	0	1928.5	21	2397	0
S004	920	1655	1918	2076	2570	904	1564	1820	1936	2430	933	1655	1918	2112	2570	904	1543	1820	1967	2430		926.5	-13	1655	0	1918	0	2094	-36	2570	0	904	0	1553.5	21	1820	0	1951.5	-31	2430	0
S005	1014	1791	2110	2237	2620	851	1473	1808	2018	2527	1034	1832	2110	2218	2620	863	1427	1808	1977	2527		1024	-20	1811.5	-41	2110	0	2227.5	19	2620	0	857	-12	1450	46	1808	0	1997.5	41	2527	0
S005	998	1637	1996	2193	2527	966	1440	1868	2029	2554	1015	1689	1996	2129	2527	963	1486	1868	2036	2554		1006.5	-17	1663	-52	1996	0	2161	64	2527	0	964.5	3	1463	-46	1868	0	2032.5	-7	2554	0
S005	1010	1593	1989	2221	2576	945	1490	1864	2057	2506	991	1611	1989	2175	2576	968	1505	1864	2014	2506		1000.5	19	1602	-18	1989	0	2198	46	2576	0	956.5	-23	1497.5	-15	1864	0	2035.5	43	2506	0
S005	1049	1704	2168	2431	2845	988	1561	1970	2161	2749	1071	1745	2168	2460	2845	994	1558	1970	2135	2749		1060	-22	1724.5	-41	2168	0	2445.5	-29	2845	0	991	-6	1559.5	3	1970	0	2148	26	2749	0
S005	1045	1860	2184	2383	2760	932	1581	2105	2358	2832	1018	1844	2184	2394	2760	927	1546	2105	2344	2832		1031.5	27	1852	16	2184	0	2388.5	-11	2760	0	929.5	5	1563.5	35	2105	0	2351	14	2832	0
S005	961	1330	2031	2161	2580	1018	1954	2055	2180	2608	927	1395	2031	2207	2580	984	1947	2055	2181	2608		944	34	1362.5	-65	2031	0	2184	-46	2580	0	1001	34	1950.5	7	2055	0	2180.5	-1	2608	0
S005	1062	1888	2252	2379	2805	929	1718	2098	2300	2820	1050	1907	2252	2412	2805	928	1722	2098	2311	2820		1056	12	1897.5	-19	2252	0	2395.5	-33	2805	0	928.5	1	1720	-4	2098	0	2305.5	-11	2820	0
S005	999	1730	2215	2407	2846	917	1611	2028	2214	2728	990	1733	2215	2424	2846	956	1585	2028	2194	2728		994.5	9	1731.5	-3	2215	0	2415.5	-17	2846	0	936.5	-39	1598	26	2028	0	2204	20	2728	0
S005	1052	1808	2207	2472	2881	968	1716	2135	2348	2874	1054	1827	2207	2457	2881	952	1705	2135	2314	2874		1053	-2	1817.5	-19	2207	0	2464.5	15	2881	0	960	16	1710.5	11	2135	0	2331	34	2874	0
S005	1082	1887	2250	2494	2862	919	1737	2129	2327	2849	1082	1887	2250	2444	2862	936	1720	2129	2339	2849		1082	0	1887	0	2250	0	2469	50	2862	0	927.5	-17	1728.5	17	2129	0	2333	-12	2849	0
S006	929	1279	1716	1745	2219	751	1285	1502	1755	2128	940	1280	1716	1683	2219	765	1291	1502	1662	2128		934.5	-11	1279.5	-1	1716	0	1714	62	2219	0	758	-14	1288	-6	1502	0	1708.5	93	2128	0
S006	940	1495	1722	1754	2258	888	1306	1625	1794	2210	950	1476	1722	1662	2258	912	1299	1625	1717	2210		945	-10	1485.5	19	1722	0	1708	92	2258	0	900	-24	1302.5	7	1625	0	1755.5	77	2210	0
S006	817	1460	1714	1803	2265	887	1341	1657	1828	2248	951	1493	1714	1648	2265	915	1364	1657	1828	2248		884	-134	1476.5	-33	1714	0	1725.5	155	2265	0	901	-28	1352.5	-23	1657	0	1828	0	2248	0
S006	735	1469	1752	1937	2354	836	1361	1678	1886	2316	884	1472	1752	1704	2354	896	1406	1678	1701	2316		809.5	-149	1470.5	-3	1752	0	1820.5	233	2354	0	866	-60	1383.5	-45	1678	0	1793.5	185	2316	0
S006	1020	1598	1894	1981	2485	883	1488	1779	2000	2459	991	1579	1894	1935	2485	963	1474	1779	2016	2459		1005.5	29	1588.5	19	1894	0	1958	46	2485	0	923	-80	1481	14	1779	0	2008	-16	2459	0
S006	712	1573	1920	1926	2522	912	1537	1802	2018	2508	766	1555	1920	1973	2522	919	1476	1802	2079	2508		739	-54	1564	18	1920	0	1949.5	-47	2522	0	915.5	-7	1506.5	61	1802	0	2048.5	-61	2508	0
S006	829	1472	1950	2159	2550	938	1489	1867	2141	2579	1045	1556	1950	2159	2550	949	1506	1867	2094	2579		937	-216	1514	-84	1950	0	2159	0	2550	0	943.5	-11	1497.5	-17	1867	0	2117.5	47	2579	0
S006	1036	1585	1892	1903	2435	839	1436	1731	1873	2366	1024	1614	1892	1855	2435	825	1451	1731	1873	2366		1030	12	1599.5	-29	1892	0	1879	48	2435	0	832	14	1443.5	-15	1731	0	1873	0	2366	0
S006	807	1737	1952	2032	2566	911	1507	1811	1962	2493	816	1719	1952	2008	2566	951	1517	1811	1938	2493		811.5	-9	1728	18	1952	0	2020	24	2566	0	931	-40	1512	-10	1811	0	1950	24	2493	0
S006	819	1527	1955	2078	2597	971	1491	1876	2046	2598	862	1561	1955	2030	2597	1010	1516	1876	2033	2598		840.5	-43	1544	-34	1955	0	2054	48	2597	0	990.5	-39	1503.5	-25	1876	0	2039.5	13	2598	0
S006	823	1700	1999	2094	2650	922	1527	1876	2024	2586	830	1756	1999	2069	2650	964	1542	1876	1987	2586		826.5	-7	1728	-56	1999	0	2081.5	25	2650	0	943	-42	1534.5	-15	1876	0	2005.5	37	2586	0
S006	799	1743	2084	2176	2753	971	1655	1957	2206	2709	828	1731	2084	2140	2753	954	1665	1957	2182	2709		813.5	-29	1737	12	2084	0	2158	36	2753	0	962.5	17	1660	-10	1957	0	2194	24	2709	0
S007	1016	1698	2008	2091	2558	749	1263	1630	1911	2291	1038	1698	2008	2166	2558	743	1232	1630	1771	2291		1027	-22	1698	0	2008	0	2128.5	-75	2558	0	746	6	1247.5	31	1630	0	1841	140	2291	0
S007	936	1425	1963	2044	2535	931	1437	1907	2143	2519	985	1453	1963	2059	2535	923	1468	1907	2032	2519		960.5	-49	1439	-28	1963	0	2051.5	-15	2535	0	927	8	1452.5	-31	1907	0	2087.5	111	2519	0
S007	1016	1513	1997	2140	2602	972	1508	1947	2178	2547	1051	1513	1997	2001	2602	962	1576	1947	2077	2547		1033.5	-35	1513	0	1997	0	2070.5	139	2602	0	967	10	1542	-68	1947	0	2127.5	101	2547	0
S007	1107	1664	2155	2307	2745	1004	1624	2025	2324	2727	1106	1636	2155	2214	2745	992	1593	2025	2243	2727		1106.5	1	1650	28	2155	0	2260.5	93	2745	0	998	12	1608.5	31	2025	0	2283.5	81	2727	0
S007	1049	1568	2154	2262	2773	990	1560	2027	2290	2699	1059	1472	2154	2236	2773	1003	1591	2027	2192	2699		1054	-10	1520	96	2154	0	2249	26	2773	0	996.5	-13	1575.5	-31	2027	0	2241	98	2699	0
S007	1002	1328	1987	2068	2505	1033	1810	2095	2284	2670	1025	1355	1987	2078	2505	1017	1779	2095	2151	2670		1013.5	-23	1341.5	-27	1987	0	2073	-10	2505	0	1025	16	1794.5	31	2095	0	2217.5	133	2670	0
S007	935	1170	1870	2074	2452	947	1692	1868	1951	2382	936	1204	1870	2009	2452	955	1735	1868	1946	2382		935.5	-1	1187	-34	1870	0	2041.5	65	2452	0	951	-8	1713.5	-43	1868	0	1948.5	5	2382	0
S007	1060	1745	2276	2391	2806	829	1402	1856	2135	2569	1072	1790	2276	2348	2806	828	1439	1856	2083	2569		1066	-12	1767.5	-45	2276	0	2369.5	43	2806	0	828.5	1	1420.5	-37	1856	0	2109	52	2569	0
S007	1108	1830	2378	2484	2926	994	1670	2164	2455	2881	1123	1797	2378	2432	2926	993	1711	2164	2335	2881		1115.5	-15	1813.5	33	2378	0	2458	52	2926	0	993.5	1	1690.5	-41	2164	0	2395	120	2881	0
S007	1191	1778	2508	2644	3141	1053	1663	2170	2566	2994	1179	1778	2508	2608	3141	1031	1667	2170	2385	2994		1185	12	1778	0	2508	0	2626	36	3141	0	1042	22	1665	-4	2170	0	2475.5	181	2994	0
S007	1234	1651	2506	2577	3073	1125	1914	2389	2760	3191	1246	1738	2506	2493	3073	1122	1939	2389	2637	3191		1240	-12	1694.5	-87	2506	0	2535	84	3073	0	1123.5	3	1926.5	-25	2389	0	2698.5	123	3191	0
S008	861	1351	1674	1776	2190	768	779	1606	1659	2116	860	1356	1674	1718	2190	779	852	1606	1622	2116		860.5	1	1353.5	-5	1674	0	1747	58	2190	0	773.5	-11	815.5	-73	1606	0	1640.5	37	2116	0
S008	849	1493	1739	1849	2276	805	981	1671	1722	2207	852	1498	1739	1830	2276	831	947	1671	1727	2207		850.5	-3	1495.5	-5	1739	0	1839.5	19	2276	0	818	-26	964	34	1671	0	1724.5	-5	2207	0
S008	903	1539	1751	1836	2268	867	1211	1760	1754	2297	913	1515	1751	1838	2268	903	1158	1760	1790	2297		908	-10	1527	24	1751	0	1837	-2	2268	0	885	-36	1184.5	53	1760	0	1772	-36	2297	0
S008	872	1497	1726	1795	2230	843	1261	1712	1804	2230	861	1507	1726	1728	2230	851	1217	1712	1766	2230		866.5	11	1502	-10	1726	0	1761.5	67	2230	0	847	-8	1239	44	1712	0	1785	38	2230	0
S008	855	1478	1720	1804	2217	834	1247	1722	1789	2219	838	1473	1720	1763	2217	837	1237	1722	1753	2219		846.5	17	1475.5	5	1720	0	1783.5	41	2217	0	835.5	-3	1242	10	1722	0	1771	36	2219	0
S008	825	1357	1694	1826	2230	852	1331	1694	1749	2185	822	1357	1694	1791	2230	887	1331	1694	1701	2185		823.5	3	1357	0	1694	0	1808.5	35	2230	0	869.5	-35	1331	0	1694	0	1725	48	2185	0
S008	953	1697	2015	2141	2554	846	1554	1885	1943	2410	966	1681	2015	2131	2554	869	1534	1885	1901	2410		959.5	-13	1689	16	2015	0	2136	10	2554	0	857.5	-23	1544	20	1885	0	1922	42	2410	0
S008	977	1827	2112	2280	2705	978	1544	2042	2133	2604	989	1831	2112	2253	2705	986	1539	2042	2163	2604		983	-12	1829	-4	2112	0	2266.5	27	2705	0	982	-8	1541.5	5	2042	0	2148	-30	2604	0
S008	1009	1753	2112	2247	2701	996	1673	2162	2294	2721	1018	1761	2112	2244	2701	1021	1694	2162	2247	2721		1013.5	-9	1757	-8	2112	0	2245.5	3	2701	0	1008.5	-25	1683.5	-21	2162	0	2270.5	47	2721	0
S008	1039	1835	2169	2343	2827	1054	1657	2135	2287	2754	1046	1839	2169	2339	2827	1083	1661	2135	2301	2754		1042.5	-7	1837	-4	2169	0	2341	4	2827	0	1068.5	-29	1659	-4	2135	0	2294	-14	2754	0
S009	837	1278	1575	1705	2030	705	932	1392	1493	1867	837	1239	1575	1685	2030	715	937	1392	1521	1867		837	0	1258.5	39	1575	0	1695	20	2030	0	710	-10	934.5	-5	1392	0	1507	-28	1867	0
S009	828	1356	1616	1752	2064	836	1182	1566	1728	2057	828	1323	1616	1709	2064	836	1182	1566	1687	2057		828	0	1339.5	33	1616	0	1730.5	43	2064	0	836	0	1182	0	1566	0	1707.5	41	2057	0
S009	824	1258	1621	1724	2101	859	1220	1586	1696	2070	856	1236	1621	1720	2101	828	1205	1586	1674	2070		840	-32	1247	22	1621	0	1722	4	2101	0	843.5	31	1212.5	15	1586	0	1685	22	2070	0
S009	851	1326	1653	1783	2150	823	1189	1640	1715	2116	858	1238	1653	1767	2150	838	1132	1640	1757	2116		854.5	-7	1282	88	1653	0	1775	16	2150	0	830.5	-15	1160.5	57	1640	0	1736	-42	2116	0
S009	868	1213	1701	1862	2186	880	1169	1686	1792	2197	877	1186	1701	1863	2186	864	1153	1686	1809	2197		872.5	-9	1199.5	27	1701	0	1862.5	-1	2186	0	872	16	1161	16	1686	0	1800.5	-17	2197	0
S009	883	1252	1718	1891	2244	882	1191	1675	1865	2177	877	1268	1718	1846	2244	866	1165	1675	1821	2177		880	6	1260	-16	1718	0	1868.5	45	2244	0	874	16	1178	26	1675	0	1843	44	2177	0
S009	898	1216	1759	1931	2257	909	1218	1759	1894	2298	913	1243	1759	1937	2257	893	1208	1759	1889	2298		905.5	-15	1229.5	-27	1759	0	1934	-6	2257	0	901	16	1213	10	1759	0	1891.5	5	2298	0
S009	912	1480	1785	1937	2331	763	1207	1627	1835	2196	933	1452	1785	1938	2331	770	1190	1627	1772	2196		922.5	-21	1466	28	1785	0	1937.5	-1	2331	0	766.5	-7	1198.5	17	1627	0	1803.5	63	2196	0
S009	907	1413	1827	2023	2394	945	1358	1775	1995	2360	924	1399	1827	2008	2394	942	1355	1775	1977	2360		915.5	-17	1406	14	1827	0	2015.5	15	2394	0	943.5	3	1356.5	3	1775	0	1986	18	2360	0
S009	867	1390	1858	2045	2447	922	1403	1823	1957	2383	929	1307	1858	1989	2447	925	1379	1823	1968	2383		898	-62	1348.5	83	1858	0	2017	56	2447	0	923.5	-3	1391	24	1823	0	1962.5	-11	2383	0
S009	935	1562	1945	2134	2563	934	1391	1888	2050	2460	929	1569	1945	2119	2563	951	1374	1888	2059	2460		932	6	1565.5	-7	1945	0	2126.5	15	2563	0	942.5	-17	1382.5	17	1888	0	2054.5	-9	2460	0
S010	860	1453	1707	1971	2365	864	1428	1693	1710	2240	865	1435	1707	1949	2365	858	1384	1693	1694	2240		862.5	-5	1444	18	1707	0	1960	22	2365	0	861	6	1406	44	1693	0	1702	16	2240	0
S010	923	1597	1833	2067	2512	934	1517	1869	1978	2489	903	1578	1833	2074	2512	904	1535	1869	1987	2489		913	20	1587.5	19	1833	0	2070.5	-7	2512	0	919	30	1526	-18	1869	0	1982.5	-9	2489	0
S010	954	1593	1904	2217	2608	880	1586	1890	2011	2544	968	1612	1904	2169	2608	898	1549	1890	2019	2544		961	-14	1602.5	-19	1904	0	2193	48	2608	0	889	-18	1567.5	37	1890	0	2015	-8	2544	0
S010	941	1531	1865	2116	2551	950	1538	1902	2083	2532	949	1574	1865	2120	2551	950	1495	1902	2089	2532		945	-8	1552.5	-43	1865	0	2118	-4	2551	0	950	0	1516.5	43	1902	0	2086	-6	2532	0
S010	970	1538	1884	2119	2610	976	1632	1940	2244	2579	981	1563	1884	2065	2610	982	1626	1940	2159	2579		975.5	-11	1550.5	-25	1884	0	2092	54	2610	0	979	-6	1629	6	1940	0	2201.5	85	2579	0
S010	966	1548	1891	2140	2644	961	1686	1980	2265	2637	966	1573	1891	2112	2644	980	1643	1980	2268	2637		966	0	1560.5	-25	1891	0	2126	28	2644	0	970.5	-19	1664.5	43	1980	0	2266.5	-3	2637	0
S010	933	1562	1816	2081	2413	1031	1750	1993	2120	2603	973	1562	1816	2094	2413	1012	1675	1993	2096	2603		953	-40	1562	0	1816	0	2087.5	-13	2413	0	1021.5	19	1712.5	75	1993	0	2108	24	2603	0
S010	972	1785	2094	2351	2761	863	1347	1894	1983	2575	773	1781	2094	2326	2761	863	1363	1894	1991	2575		872.5	199	1783	4	2094	0	2338.5	25	2761	0	863	0	1355	-16	1894	0	1987	-8	2575	0
S010	994	1762	2139	2458	2923	1022	1708	2094	2359	2767	833	1754	2139	2468	2923	1035	1716	2094	2364	2767		913.5	161	1758	8	2139	0	2463	-10	2923	0	1028.5	-13	1712	-8	2094	0	2361.5	-5	2767	0
S010	1028	1787	2140	2445	2943	1084	1819	2198	2501	2977	1056	1837	2140	2411	2943	1080	1802	2198	2599	2977		1042	-28	1812	-50	2140	0	2428	34	2943	0	1082	4	1810.5	17	2198	0	2550	-98	2977	0
S010	971	1694	2068	2391	2909	1063	1770	2126	2496	2877	1000	1656	2068	2292	2909	1080	1757	2126	2480	2877		985.5	-29	1675	38	2068	0	2341.5	99	2909	0	1071.5	-17	1763.5	13	2126	0	2488	16	2877	0
S011	804	1262	1702	1785	2147	758	1039	1399	1631	2020	832	1173	1702	1779	2147	747	995	1399	1650	2020		818	-28	1217.5	89	1702	0	1782	6	2147	0	752.5	11	1017	44	1399	0	1640.5	-19	2020	0
S011	865	1207	1767	1908	2236	852	1326	1550	1785	2163	882	1146	1767	1901	2236	825	1249	1550	1783	2163		873.5	-17	1176.5	61	1767	0	1904.5	7	2236	0	838.5	27	1287.5	77	1550	0	1784	2	2163	0
S011	894	1305	1803	1928	2294	864	1398	1661	1933	2274	920	1366	1803	1944	2294	892	1382	1661	1932	2274		907	-26	1335.5	-61	1803	0	1936	-16	2294	0	878	-28	1390	16	1661	0	1932.5	1	2274	0
S011	879	1450	1793	1959	2281	930	1409	1683	1915	2294	900	1208	1793	1940	2281	914	1437	1683	1921	2294		889.5	-21	1329	242	1793	0	1949.5	19	2281	0	922	16	1423	-28	1683	0	1918	-6	2294	0
S011	931	1372	1837	1935	2319	910	1428	1711	1988	2308	926	1135	1837	1983	2319	927	1439	1711	1951	2308		928.5	5	1253.5	237	1837	0	1959	-48	2319	0	918.5	-17	1433.5	-11	1711	0	1969.5	37	2308	0
S011	915	1139	1801	1954	2313	964	1553	1709	1991	2277	930	1029	1801	1976	2313	975	1548	1709	1983	2277		922.5	-15	1084	110	1801	0	1965	-22	2313	0	969.5	-11	1550.5	5	1709	0	1987	8	2277	0
S011	853	1067	1677	1843	2179	922	1501	1719	1901	2244	880	1067	1677	1849	2179	928	1517	1719	1902	2244		866.5	-27	1067	0	1677	0	1846	-6	2179	0	925	-6	1509	-16	1719	0	1901.5	-1	2244	0
S011	1016	1782	1951	2105	2448	845	1433	1702	2001	2376	1006	1811	1951	2129	2448	835	1375	1702	1997	2376		1011	10	1796.5	-29	1951	0	2117	-24	2448	0	840	10	1404	58	1702	0	1999	4	2376	0
S011	890	1694	1881	1968	2369	873	1365	1730	2021	2327	895	1656	1881	2061	2369	902	1393	1730	1952	2327		892.5	-5	1675	38	1881	0	2014.5	-93	2369	0	887.5	-29	1379	-28	1730	0	1986.5	69	2327	0
S011	804	1672	1883	2019	2428	979	1490	1783	2041	2388	833	1725	1883	2047	2428	979	1499	1783	2044	2388		818.5	-29	1698.5	-53	1883	0	2033	-28	2428	0	979	0	1494.5	-9	1783	0	2042.5	-3	2388	0
S011	992	1633	1928	2010	2412	932	1482	1811	2061	2457	925	1725	1928	2009	2412	985	1510	1811	2113	2457		958.5	67	1679	-92	1928	0	2009.5	1	2412	0	958.5	-53	1496	-28	1811	0	2087	-52	2457	0
S011	936	1620	1932	2090	2496	937	1573	1772	2012	2371	936	1558	1932	2092	2496	923	1535	1772	2021	2371		936	0	1589	62	1932	0	2091	-2	2496	0	930	14	1554	38	1772	0	2016.5	-9	2371	0
S012	857	1380	1613	1834	2165	723	1149	1475	1645	1999	878	1368	1613	1847	2165	722	1168	1475	1614	1999		867.5	-21	1374	12	1613	0	1840.5	-13	2165	0	722.5	1	1158.5	-19	1475	0	1629.5	31	1999	0
S012	825	1402	1634	1911	2230	843	1283	1612	1847	2140	849	1406	1634	1912	2230	821	1272	1612	1817	2140		837	-24	1404	-4	1634	0	1911.5	-1	2230	0	832	22	1277.5	11	1612	0	1832	30	2140	0
S012	823	1456	1695	1841	2217	890	1303	1721	1922	2260	855	1493	1695	1862	2217	889	1318	1721	1907	2260		839	-32	1474.5	-37	1695	0	1851.5	-21	2217	0	889.5	1	1310.5	-15	1721	0	1914.5	15	2260	0
S012	876	1482	1695	1936	2241	928	1299	1702	1849	2270	890	1506	1695	1886	2241	930	1348	1702	1783	2270		883	-14	1494	-24	1695	0	1911	50	2241	0	929	-2	1323.5	-49	1702	0	1816	66	2270	0
S012	864	1524	1748	1965	2285	859	1203	1654	1877	2259	868	1517	1748	1947	2285	862	1275	1654	1886	2259		866	-4	1520.5	7	1748	0	1956	18	2285	0	860.5	-3	1239	-72	1654	0	1881.5	-9	2259	0
S012	876	1399	1695	1936	2252	884	1351	1691	1902	2232	923	1424	1695	1908	2252	883	1362	1691	1896	2232		899.5	-47	1411.5	-25	1695	0	1922	28	2252	0	883.5	1	1356.5	-11	1691	0	1899	6	2232	0
S012	853	1280	1640	1830	2188	922	1376	1708	1885	2176	873	1258	1640	1814	2188	919	1376	1708	1894	2176		863	-20	1269	22	1640	0	1822	16	2188	0	920.5	3	1376	0	1708	0	1889.5	-9	2176	0
S012	911	1597	1857	2150	2420	796	1265	1643	1831	2259	951	1577	1857	2126	2420	821	1260	1643	1867	2259		931	-40	1587	20	1857	0	2138	24	2420	0	808.5	-25	1262.5	5	1643	0	1849	-36	2259	0
S012	958	1693	1952	2198	2535	968	1486	1864	2064	2513	983	1672	1952	2183	2535	981	1467	1864	2055	2513		970.5	-25	1682.5	21	1952	0	2190.5	15	2535	0	974.5	-13	1476.5	19	1864	0	2059.5	9	2513	0
S012	963	1674	1967	2203	2561	983	1441	1834	2067	2472	982	1676	1967	2206	2561	973	1435	1834	2057	2472		972.5	-19	1675	-2	1967	0	2204.5	-3	2561	0	978	10	1438	6	1834	0	2062	10	2472	0
S012	1003	1713	2006	2242	2634	1015	1593	1967	2243	2630	1018	1726	2006	2208	2634	1021	1613	1967	2220	2630		1010.5	-15	1719.5	-13	2006	0	2225	34	2634	0	1018	-6	1603	-20	1967	0	2231.5	23	2630	0
S012	969	1739	1987	2341	2634	1009	1611	1926	2177	2550	980	1751	1987	2300	2634	1026	1623	1926	2129	2550		974.5	-11	1745	-12	1987	0	2320.5	41	2634	0	1017.5	-17	1617	-12	1926	0	2153	48	2550	0
S013	849	1372	1755	1949	2387	789	1214	1553	1704	2190	867	1335	1755	1924	2387	801	1219	1553	1786	2190		858	-18	1353.5	37	1755	0	1936.5	25	2387	0	795	-12	1216.5	-5	1553	0	1745	-82	2190	0
S013	938	1406	1849	1970	2467	920	1488	1831	1991	2434	936	1393	1849	1982	2467	928	1480	1831	2038	2434		937	2	1399.5	13	1849	0	1976	-12	2467	0	924	-8	1484	8	1831	0	2014.5	-47	2434	0
S013	948	1429	1899	2089	2556	975	1453	1852	2007	2467	963	1458	1899	2108	2556	1013	1472	1852	2051	2467		955.5	-15	1443.5	-29	1899	0	2098.5	-19	2556	0	994	-38	1462.5	-19	1852	0	2029	-44	2467	0
S013	895	1446	1918	2079	2569	1036	1514	1939	2210	2600	945	1479	1918	2101	2569	1070	1514	1939	2226	2600		920	-50	1462.5	-33	1918	0	2090	-22	2569	0	1053	-34	1514	0	1939	0	2218	-16	2600	0
S013	995	1532	2005	2206	2705	1003	1467	1950	2267	2654	986	1531	2005	2214	2705	1030	1536	1950	2187	2654		990.5	9	1531.5	1	2005	0	2210	-8	2705	0	1016.5	-27	1501.5	-69	1950	0	2227	80	2654	0
S013	987	1455	1898	2032	2481	1019	1548	1966	2244	2646	1072	1458	1898	2096	2481	1030	1592	1966	2170	2646		1029.5	-85	1456.5	-3	1898	0	2064	-64	2481	0	1024.5	-11	1570	-44	1966	0	2207	74	2646	0
S013	1028	1554	1985	2152	2636	839	1385	1753	2025	2402	1040	1527	1985	2134	2636	840	1385	1753	1852	2402		1034	-12	1540.5	27	1985	0	2143	18	2636	0	839.5	-1	1385	0	1753	0	1938.5	173	2402	0
S013	1012	1549	1943	2106	2615	975	1553	1955	2296	2614	1017	1542	1943	2170	2615	1023	1585	1955	2196	2614		1014.5	-5	1545.5	7	1943	0	2138	-64	2615	0	999	-48	1569	-32	1955	0	2246	100	2614	0
S013	967	1658	2079	2267	2737	982	1559	1951	2251	2642	1058	1652	2079	2276	2737	1002	1572	1951	2237	2642		1012.5	-91	1655	6	2079	0	2271.5	-9	2737	0	992	-20	1565.5	-13	1951	0	2244	14	2642	0
S013	995	1728	2122	2264	2787	1084	1683	2095	2333	2766	1087	1711	2122	2343	2787	1131	1672	2095	2316	2766		1041	-92	1719.5	17	2122	0	2303.5	-79	2787	0	1107.5	-47	1677.5	11	2095	0	2324.5	17	2766	0
S014	953	1462	1707	1765	2225	769	1113	1526	1663	2051	966	1456	1707	1831	2225	768	1120	1526	1599	2051		959.5	-13	1459	6	1707	0	1798	-66	2225	0	768.5	1	1116.5	-7	1526	0	1631	64	2051	0
S014	971	1480	1722	1961	2293	892	1359	1727	1910	2238	960	1461	1722	1979	2293	875	1354	1727	1877	2238		965.5	11	1470.5	19	1722	0	1970	-18	2293	0	883.5	17	1356.5	5	1727	0	1893.5	33	2238	0
S014	934	1471	1730	1870	2267	924	1268	1739	1928	2279	930	1437	1730	1871	2267	933	1302	1739	1891	2279		932	4	1454	34	1730	0	1870.5	-1	2267	0	928.5	-9	1285	-34	1739	0	1909.5	37	2279	0
S014	937	1515	1772	1969	2311	901	1382	1760	1974	2295	948	1487	1772	1961	2311	917	1407	1760	1897	2295		942.5	-11	1501	28	1772	0	1965	8	2311	0	909	-16	1394.5	-25	1760	0	1935.5	77	2295	0
S014	992	1543	1811	2052	2374	931	1385	1773	1963	2331	988	1511	1811	2045	2374	940	1353	1773	1926	2331		990	4	1527	32	1811	0	2048.5	7	2374	0	935.5	-9	1369	32	1773	0	1944.5	37	2331	0
S014	930	1425	1759	1989	2359	966	1393	1796	1957	2319	915	1411	1759	2039	2359	977	1406	1796	1896	2319		922.5	15	1418	14	1759	0	2014	-50	2359	0	971.5	-11	1399.5	-13	1796	0	1926.5	61	2319	0
S014	827	937	1635	1872	2184	945	1605	1792	1867	2255	825	918	1635	1898	2184	981	1620	1792	1862	2255		826	2	927.5	19	1635	0	1885	-26	2184	0	963	-36	1612.5	-15	1792	0	1864.5	5	2255	0
S014	1054	1724	2016	2137	2525	820	1367	1747	2038	2380	1070	1714	2016	2176	2525	813	1358	1747	1957	2380		1062	-16	1719	10	2016	0	2156.5	-39	2525	0	816.5	7	1362.5	9	1747	0	1997.5	81	2380	0
S014	1057	1707	2000	2192	2631	989	1597	1912	2124	2512	1084	1704	2000	2203	2631	989	1621	1912	2079	2512		1070.5	-27	1705.5	3	2000	0	2197.5	-11	2631	0	989	0	1609	-24	1912	0	2101.5	45	2512	0
S014	1036	1696	2017	2264	2584	1087	1541	2024	2243	2632	1046	1678	2017	2223	2584	1083	1591	2024	2219	2632		1041	-10	1687	18	2017	0	2243.5	41	2584	0	1085	4	1566	-50	2024	0	2231	24	2632	0
S014	1073	1692	2009	2321	2686	1035	1592	1975	2180	2563	1068	1704	2009	2286	2686	1028	1622	1975	2143	2563		1070.5	5	1698	-12	2009	0	2303.5	35	2686	0	1031.5	7	1607	-30	1975	0	2161.5	37	2563	0
S015	908	1527	1708	1876	2298	740	1282	1540	1862	2206	900	1519	1708	1901	2298	736	1278	1540	1738	2206		904	8	1523	8	1708	0	1888.5	-25	2298	0	738	4	1280	4	1540	0	1800	124	2206	0
S015	932	1512	1737	2002	2389	804	1359	1644	1965	2325	935	1544	1737	1983	2389	822	1344	1644	1932	2325		933.5	-3	1528	-32	1737	0	1992.5	19	2389	0	813	-18	1351.5	15	1644	0	1948.5	33	2325	0
S015	903	1600	1805	2116	2496	813	1394	1720	1987	2387	900	1586	1805	2113	2496	825	1434	1720	2007	2387		901.5	3	1593	14	1805	0	2114.5	3	2496	0	819	-12	1414	-40	1720	0	1997	-20	2387	0
S015	922	1644	1846	2122	2573	903	1496	1841	2115	2520	928	1640	1846	2141	2573	916	1535	1841	2041	2520		925	-6	1642	4	1846	0	2131.5	-19	2573	0	909.5	-13	1515.5	-39	1841	0	2078	74	2520	0
S015	1019	1741	1901	2231	2632	962	1556	1882	2252	2600	925	1689	1901	2241	2632	951	1565	1882	2221	2600		972	94	1715	52	1901	0	2236	-10	2632	0	956.5	11	1560.5	-9	1882	0	2236.5	31	2600	0
S015	954	1663	1847	2102	2476	1019	1484	1900	2128	2552	905	1653	1847	2087	2476	989	1541	1900	2150	2552		929.5	49	1658	10	1847	0	2094.5	15	2476	0	1004	30	1512.5	-57	1900	0	2139	-22	2552	0
S015	1026	1831	2017	2275	2674	831	1491	1807	2162	2582	1013	1802	2017	2265	2674	839	1582	1807	2148	2582		1019.5	13	1816.5	29	2017	0	2270	10	2674	0	835	-8	1536.5	-91	1807	0	2155	14	2582	0
S015	932	1706	1901	2201	2609	1004	1602	1885	2160	2556	933	1668	1901	2163	2609	1003	1606	1885	2171	2556		932.5	-1	1687	38	1901	0	2182	38	2609	0	1003.5	1	1604	-4	1885	0	2165.5	-11	2556	0
S015	933	1717	1948	2264	2724	986	1595	1939	2162	2641	958	1722	1948	2238	2724	990	1635	1939	2221	2641		945.5	-25	1719.5	-5	1948	0	2251	26	2724	0	988	-4	1615	-40	1939	0	2191.5	-59	2641	0
S015	975	1852	2089	2429	2905	1028	1688	2042	2380	2882	968	1835	2089	2413	2905	1005	1669	2042	2433	2882		971.5	7	1843.5	17	2089	0	2421	16	2905	0	1016.5	23	1678.5	19	2042	0	2406.5	-53	2882	0

## Sheet: Curve_ICC(1,1)_Tomita
Skater No.	Curve_R_onset_tomita_1	Curve_R_PushOn_tomita_1	Curve_R_PushOff_tomita_1	Curve_R_OffSet_tomita_1	Curve_L_onset_tomita_1	Curve_L_PushOn_tomita_1	Curve_L_PushOff_tomita_1	Curve_L_OffSet_tomita_1	Curve_R_onset_tomita_2	Curve_R_PushOn_tomita_2	Curve_R_PushOff_tomita_2	Curve_R_OffSet_tomita_2	Curve_L_onset_tomita_2	Curve_L_PushOn_tomita_2	Curve_L_PushOff_tomita_2	Curve_L_OffSet_tomita_2
S001	532	1125	1065	1461	799	1307	1377	1572	549	1125	1104	1461	797	1307	1351	1572
S001	553	1058	1126	1410	728	1153	1172	1421	558	1058	984	1410	721	1153	1095	1421
S001	545	1060	1096	1389	687	1128	1196	1418	567	1060	993	1389	693	1128	1157	1418
S001	574	1109	1074	1460	697	1096	1119	1419	597	1109	1023	1460	706	1096	1145	1419
S001	585	1128	1059	1464	700	1149	1209	1514	582	1128	1059	1464	693	1149	1235	1514
S001	629	1217	1207	1588	679	1164	1178	1474	652	1217	1168	1588	688	1164	1153	1474
S001	553	1146	1115	1524	615	1195	1278	1560	573	1146	1089	1524	723	1195	1265	1560
S001	560	1152	1074	1519	699	1167	1266	1506	584	1152	1036	1519	711	1167	1214	1506
S001	568	1129	1077	1495	743	1158	1204	1478	574	1129	1039	1495	779	1158	1088	1478
S001	589	1205	1182	1599	759	1204	1248	1538	614	1205	1117	1599	771	1204	1016	1538
S001	674	1338	1374	1817	972	1704	1755	2061	688	1338	1362	1817	985	1704	1767	2061
S001	653	1307	1291	1769	802	1412	1440	1759	677	1307	1303	1769	790	1412	1488	1759
S001	712	1305	1351	1768	796	1421	1475	1815	725	1305	1363	1768	812	1421	1499	1815
S001	673	1296	1257	1752	763	1362	1429	1739	703	1296	1305	1752	815	1362	1381	1739
S001	703	1303	1286	1737	802	1370	1484	1777	708	1303	1322	1737	798	1370	1424	1777
S001	716	1362	1331	1783	761	1376	1428	1729	705	1362	1307	1783	766	1376	1440	1729
S001	714	1355	1402	1837	811	1382	1457	1802	740	1355	1354	1837	843	1382	1445	1802
S002	596	1239	1246	1672	831	1533	1590	1900	612	1239	1277	1672	831	1533	1590	1900
S002	658	1154	1076	1572	649	1269	1315	1605	673	1154	1107	1572	649	1269	1315	1605
S002	649	1198	1160	1616	639	1261	1304	1603	665	1198	1175	1616	654	1261	1242	1603
S002	674	1193	1169	1609	645	1265	1342	1613	658	1193	1169	1609	661	1265	1295	1613
S002	659	1223	1216	1643	642	1270	1307	1623	612	1223	1201	1643	626	1270	1292	1623
S002	703	1306	1291	1748	644	1340	1433	1720	687	1306	1260	1748	628	1340	1433	1720
S002	657	1239	1199	1667	673	1326	1385	1679	642	1239	1184	1667	688	1326	1338	1679
S002	724	1278	1281	1718	712	1339	1377	1712	708	1278	1235	1718	696	1339	1439	1712
S002	693	1260	1281	1736	671	1347	1337	1703	677	1260	1265	1736	687	1347	1337	1703
S002	675	1286	1278	1733	671	1374	1460	1748	690	1286	1309	1733	671	1374	1414	1748
S002	692	1332	1408	1837	931	1726	1839	2111	692	1332	1408	1837	958	1726	1825	2111
S002	726	1394	1524	1921	691	1445	1489	1871	699	1394	1511	1921	691	1445	1475	1871
S002	704	1372	1474	1892	732	1495	1557	1912	690	1372	1433	1892	718	1495	1544	1912
S002	600	1381	1453	1865	732	1477	1516	1901	697	1381	1440	1865	746	1477	1516	1901
S002	675	1381	1487	1873	716	1470	1528	1891	689	1381	1432	1873	716	1470	1528	1891
S002	728	1420	1471	1930	724	1486	1577	1879	701	1420	1444	1930	724	1486	1535	1879
S002	711	1407	1564	1914	688	1477	1569	1877	697	1407	1509	1914	729	1477	1541	1877
S002	778	1448	1534	1942	806	1537	1604	1957	778	1448	1521	1942	792	1537	1590	1957
S003	630	1177	1204	1625	744	1366	1499	1757	663	1177	1204	1625	789	1366	1473	1757
S003	608	1055	1088	1514	662	1219	1238	1515	624	1055	1063	1514	696	1219	1212	1515
S003	610	1143	1148	1576	670	1279	1335	1585	658	1143	1135	1576	677	1279	1348	1585
S003	622	1189	1210	1670	673	1272	1324	1635	642	1189	1210	1670	692	1272	1349	1635
S003	623	1115	1165	1598	648	1278	1352	1597	636	1115	1165	1598	656	1278	1339	1597
S003	593	1098	1166	1546	669	1260	1329	1579	599	1098	1115	1546	684	1260	1342	1579
S003	635	1162	1220	1657	659	1252	1259	1614	652	1162	1207	1657	691	1252	1323	1614
S003	626	1177	1265	1714	678	1291	1347	1671	633	1177	1214	1714	677	1291	1360	1671
S003	602	1280	1318	1788	735	1385	1430	1742	609	1280	1267	1788	747	1385	1430	1742
S003	676	1289	1482	1934	1064	1810	1894	2251	675	1289	1470	1934	1087	1810	1954	2251
S003	587	1372	1534	1979	771	1519	1557	1987	679	1372	1510	1979	799	1519	1593	1987
S003	690	1323	1457	1902	746	1508	1604	1928	711	1323	1481	1902	762	1508	1592	1928
S003	689	1265	1457	1878	748	1439	1542	1848	698	1265	1469	1878	760	1439	1542	1848
S003	656	1350	1553	1976	752	1501	1608	1936	686	1350	1565	1976	754	1501	1632	1936
S003	773	1603	1936	2299	785	1657	1743	2121	793	1603	1828	2299	816	1657	1743	2121
S004	521	1025	1076	1505	811	1354	1340	1646	534	1025	1076	1505	824	1354	1353	1646
S004	551	1028	1054	1491	661	1210	1177	1474	513	1028	1016	1491	661	1210	1151	1474
S004	531	1058	1072	1578	671	1235	1264	1552	518	1058	1124	1578	671	1235	1199	1552
S004	539	1046	1145	1561	679	1245	1234	1552	539	1046	1094	1561	666	1245	1182	1552
S004	500	1000	1093	1503	688	1215	1230	1509	435	1000	1067	1503	714	1215	1204	1509
S004	506	1021	1190	1608	701	1249	1230	1521	506	1021	1125	1608	688	1249	1178	1521
S004	446	971	1142	1561	753	1277	1269	1567	472	971	1026	1561	766	1277	1230	1567
S004	471	986	1232	1651	721	1338	1327	1622	471	986	1142	1651	721	1338	1289	1622
S004	523	990	1193	1586	789	1347	1279	1627	497	990	1116	1586	776	1347	1253	1627
S004	597	1157	1548	1864	958	1628	1704	1980	597	1157	1391	1864	946	1628	1620	1980
S004	526	1151	1477	1883	784	1459	1470	1837	526	1151	1405	1883	784	1459	1446	1837
S004	485	1085	1304	1735	837	1450	1511	1817	521	1085	1243	1735	788	1450	1451	1817
S004	544	1160	1495	1857	753	1410	1463	1772	520	1160	1374	1857	777	1410	1415	1772
S004	480	1145	1335	1751	823	1486	1521	1884	504	1145	1287	1751	835	1486	1509	1884
S004	643	1291	1498	1963	745	1423	1479	1814	643	1291	1498	1963	769	1423	1515	1814
S004	522	1233	1437	1853	808	1475	1543	1904	510	1233	1413	1853	833	1475	1519	1904
S005	639	1363	1475	1834	792	1546	1566	1919	634	1363	1377	1834	833	1546	1406	1919
S005	651	1411	1574	1878	768	1459	1462	1835	658	1411	1370	1878	772	1459	1360	1835
S005	588	1391	1480	1863	786	1489	1535	1894	761	1391	1395	1863	779	1489	1552	1894
S005	682	1413	1376	1881	744	1443	1505	1868	724	1413	1405	1881	773	1443	1500	1868
S005	783	1433	1409	1893	790	1465	1527	1901	762	1433	1412	1893	808	1465	1489	1901
S005	718	1417	1387	1899	784	1444	1428	1843	695	1417	1392	1899	780	1444	1508	1843
S005	683	1403	1408	1897	762	1515	1536	1921	762	1403	1443	1897	748	1515	1553	1921
S005	768	1493	1493	2039	798	1537	1616	1959	753	1493	1481	2039	777	1537	1520	1959
S005	804	1561	1585	2065	784	1605	1651	2022	819	1561	1562	2065	753	1605	1681	2022
S005	813	1744	1928	2347	979	1867	1991	2443	919	1744	1874	2347	990	1867	1983	2443
S005	820	1676	1914	2311	843	1720	1876	2253	868	1676	1874	2311	869	1720	1901	2253
S005	831	1719	1900	2357	872	1785	1982	2368	918	1719	1911	2357	912	1785	1969	2368
S005	880	1690	1731	2287	863	1801	1978	2373	934	1690	1733	2287	865	1801	1987	2373
S005	854	1875	1839	2380	776	1759	1938	2340	930	1875	1820	2380	762	1759	1923	2340
S005	838	1820	1942	2396	816	1751	1848	2280	949	1820	1916	2396	834	1751	1866	2280
S006	629	1102	1142	1601	748	1467	1503	1779	587	1102	1142	1601	755	1467	1490	1779
S006	596	1059	1050	1496	618	1229	1220	1505	585	1059	1050	1496	652	1229	1271	1505
S006	645	1140	1153	1598	685	1255	1288	1569	663	1140	1153	1598	669	1255	1314	1569
S006	615	1169	1167	1666	714	1279	1370	1627	638	1169	1193	1666	738	1279	1422	1627
S006	694	1204	1178	1650	660	1321	1394	1655	649	1204	1165	1650	672	1321	1239	1655
S006	663	1254	1282	1733	735	1386	1403	1712	663	1254	1269	1733	758	1386	1403	1712
S006	577	1237	1290	1779	681	1346	1406	1702	671	1237	1329	1779	723	1346	1393	1702
S006	570	1181	1214	1709	699	1403	1420	1744	594	1181	1214	1709	749	1403	1381	1744
S006	592	1214	1259	1736	736	1392	1339	1698	588	1214	1259	1736	759	1392	1339	1698
S006	683	1319	1422	1881	851	1732	1768	2074	699	1319	1448	1881	891	1732	1781	2074
S006	665	1353	1437	2451	749	1536	1577	1904	727	1353	1424	2451	777	1536	1616	1904
S006	227	931	1114	1567	817	1651	1633	2037	263	931	1127	1567	885	1651	1633	2037
S006	663	1410	1623	2082	850	1621	1647	2046	720	1410	1598	2082	809	1621	1647	2046
S006	661	1377	1476	2055	832	1633	1665	2039	702	1377	1489	2055	826	1633	1704	2039
S006	774	1484	1562	2108	796	1714	1728	2121	853	1484	1562	2108	812	1714	1702	2121
S006	772	1453	1492	2048	889	1667	1774	2062	808	1453	1505	2048	845	1667	1722	2062
S007	613	1267	1200	1672	759	1359	1439	1773	635	1267	1186	1672	800	1359	1494	1773
S007	650	1256	1199	1645	696	1246	1229	1660	611	1256	1174	1645	681	1246	1307	1660
S007	656	1313	1257	1725	676	1256	1303	1684	694	1313	1245	1725	675	1256	1319	1684
S007	577	1279	1234	1679	684	1248	1352	1702	530	1279	1199	1679	707	1248	1339	1702
S007	687	1355	1289	1762	651	1287	1306	1712	715	1355	1266	1762	671	1287	1359	1712
S007	600	1318	1291	1728	707	1332	1343	1745	632	1318	1245	1728	718	1332	1381	1745
S007	678	1347	1296	1750	695	1331	1378	1766	688	1347	1270	1750	707	1331	1407	1766
S007	648	1312	1264	1727	686	1300	1330	1731	666	1312	1211	1727	701	1300	1345	1731
S007	739	1339	1240	1774	705	1357	1348	1716	735	1339	1274	1774	716	1357	1422	1716
S007	668	1352	1323	1837	711	1356	1335	1784	664	1352	1315	1837	722	1356	1404	1784
S007	800	1730	1811	2311	962	1868	1974	2473	817	1730	1819	2311	999	1868	2006	2473
S007	682	1519	1523	2054	841	1605	1729	2151	720	1519	1529	2054	871	1605	1708	2151
S007	728	1564	1629	2118	799	1545	1601	2048	747	1564	1595	2118	801	1545	1594	2048
S007	813	1675	1726	2242	860	1642	1823	2240	815	1675	1690	2242	846	1642	1815	2240
S007	733	1678	1630	2158	889	1680	1715	2192	742	1678	1606	2158	896	1680	1783	2192
S007	726	1580	1494	2011	879	1591	1738	2101	731	1580	1485	2011	862	1591	1688	2101
S007	695	1656	1561	2160	774	1502	1659	2017	702	1656	1616	2160	777	1502	1591	2017
S008	517	1078	1048	1524	741	1237	1239	1606	523	1078	1060	1524	753	1237	1352	1606
S008	491	1043	1007	1456	695	1175	1194	1503	553	1043	987	1456	706	1175	1259	1503
S008	550	1065	1086	1547	699	1162	1187	1479	558	1065	1074	1547	695	1162	1185	1479
S008	505	1043	1061	1504	717	1226	1294	1554	528	1043	1019	1504	708	1226	1286	1554
S008	524	1045	1066	1500	710	1210	1211	1526	563	1045	1074	1500	702	1210	1239	1526
S008	574	1105	1114	1593	677	1231	1220	1556	611	1105	1148	1593	699	1231	1257	1556
S008	551	1068	1133	1579	727	1254	1276	1558	572	1068	1129	1579	707	1254	1280	1558
S008	581	1125	1166	1675	720	1299	1266	1620	608	1125	1197	1675	744	1299	1265	1620
S008	631	1172	1219	1721	756	1388	1348	1672	626	1172	1246	1721	771	1388	1349	1672
S008	701	1353	1489	1964	910	1611	1593	2045	692	1353	1497	1964	926	1611	1669	2045
S008	619	1273	1485	1933	825	1458	1529	1905	623	1273	1532	1933	814	1458	1503	1905
S008	619	1291	1389	1857	819	1526	1595	1953	652	1291	1382	1857	845	1526	1593	1953
S008	658	1391	1461	2013	790	1458	1479	1920	694	1391	1532	2013	796	1458	1535	1920
S008	634	1386	1461	2008	827	1473	1529	1962	655	1386	1555	2008	870	1473	1618	1962
S008	671	1416	1485	2003	858	1520	1579	2002	703	1416	1455	2003	862	1520	1638	2002
S009	670	1175	1193	1524	769	1334	1354	1664	678	1175	1173	1524	777	1334	1360	1664
S009	576	1105	1139	1458	667	1141	1161	1477	584	1105	1117	1458	656	1141	1219	1477
S009	514	1080	1105	1470	652	1088	1123	1414	526	1080	1108	1470	628	1088	1068	1414
S009	623	1100	1105	1488	707	1161	1164	1493	580	1100	1088	1488	664	1161	1153	1493
S009	622	1139	1165	1520	677	1176	1033	1538	585	1139	1161	1520	676	1176	1097	1538
S009	560	1123	1115	1507	684	1151	1182	1494	588	1123	1115	1507	674	1151	1176	1494
S009	569	1153	1125	1529	691	1164	1143	1511	599	1153	1181	1529	685	1164	1168	1511
S009	550	1128	1144	1482	671	1179	1195	1525	594	1128	1126	1482	685	1179	1193	1525
S009	561	1133	1163	1502	642	1159	1140	1480	605	1133	1125	1502	653	1159	1136	1480
S009	563	1138	1131	1518	669	1151	1146	1485	564	1138	1128	1518	672	1151	1149	1485
S009	595	1163	1192	1565	674	1197	1209	1546	589	1163	1196	1565	692	1197	1163	1546
S009	653	1293	1381	1770	871	1502	1642	1923	658	1293	1370	1770	880	1502	1572	1923
S009	653	1286	1352	1764	785	1331	1460	1775	679	1286	1324	1764	789	1331	1455	1775
S009	628	1281	1368	1756	719	1364	1362	1749	628	1281	1387	1756	718	1364	1389	1749
S009	633	1276	1340	1753	747	1337	1405	1747	653	1276	1381	1753	729	1337	1384	1747
S009	676	1322	1432	1794	765	1365	1464	1790	655	1322	1440	1794	768	1365	1470	1790
S009	668	1279	1301	1745	782	1347	1415	1768	663	1279	1323	1745	753	1347	1409	1768
S009	683	1330	1323	1807	749	1365	1414	1773	683	1330	1349	1807	771	1365	1375	1773
S009	667	1361	1477	1864	757	1376	1524	1817	652	1361	1467	1864	738	1376	1450	1817
S010	540	1143	1212	1564	738	1351	1349	1608	543	1143	1224	1564	763	1351	1407	1608
S010	674	1214	1227	1666	697	1365	1319	1679	676	1214	1264	1666	703	1365	1384	1679
S010	689	1202	1295	1660	678	1338	1358	1646	701	1202	1370	1660	696	1338	1378	1646
S010	687	1174	1167	1630	723	1329	1291	1636	670	1174	1184	1630	723	1329	1311	1636
S010	693	1195	1193	1672	685	1333	1296	1655	687	1195	1251	1672	666	1333	1372	1655
S010	697	1206	1332	1660	727	1356	1374	1687	688	1206	1313	1660	746	1356	1365	1687
S010	689	1214	1436	1718	675	1338	1312	1652	675	1214	1450	1718	719	1338	1369	1652
S010	636	1155	1343	1683	739	1378	1409	1673	636	1155	1348	1683	733	1378	1377	1673
S010	656	1229	1456	1803	763	1444	1454	1743	675	1229	1449	1803	757	1444	1401	1743
S010	676	1227	1494	1868	804	1501	1444	1748	674	1227	1492	1868	798	1501	1448	1748
S010	737	1320	1667	1967	915	1742	1637	2074	718	1320	1660	1967	903	1742	1677	2074
S010	628	1335	1712	2042	774	1632	1668	1983	696	1335	1706	2042	786	1632	1535	1983
S010	680	1382	1759	2093	828	1693	1728	2068	723	1382	1714	2093	810	1693	1714	2068
S010	693	1420	1555	1966	842	1730	1703	2146	736	1420	1690	1966	866	1730	1771	2146
S010	752	1404	1709	2071	758	1609	1678	1957	777	1404	1712	2071	752	1609	1663	1957
S010	688	1354	1573	2019	839	1630	1624	1968	719	1354	1593	2019	821	1630	1638	1968
S010	670	1374	1767	2052	866	1700	1761	2035	701	1374	1723	2052	884	1700	1733	2035
S010	730	1409	1727	2125	850	1697	1723	2097	749	1409	1727	2125	881	1697	1748	2097
S011	563	1157	1280	1556	763	1349	1366	1653	640	1157	1219	1556	735	1349	1335	1653
S011	577	1107	1141	1494	690	1238	1226	1514	615	1107	1160	1494	651	1238	1224	1514
S011	580	1092	1243	1502	635	1213	1212	1485	580	1092	1252	1502	640	1213	1246	1485
S011	598	1128	1185	1526	675	1227	1268	1535	592	1128	1203	1526	658	1227	1259	1535
S011	619	1141	1159	1547	637	1231	1274	1546	624	1141	1158	1547	621	1231	1260	1546
S011	603	1156	1235	1593	639	1200	1200	1545	558	1156	1192	1593	644	1200	1217	1545
S011	617	1126	1279	1566	663	1286	1319	1575	628	1126	1206	1566	663	1286	1296	1575
S011	593	1111	1213	1557	668	1271	1189	1529	615	1111	1199	1557	668	1271	1252	1529
S011	583	1114	1334	1556	692	1306	1283	1586	594	1114	1139	1556	714	1306	1286	1586
S011	635	1263	1347	1701	647	1286	1279	1590	646	1263	1373	1701	664	1286	1280	1590
S011	726	1333	1445	1865	950	1696	1754	2056	731	1333	1430	1865	930	1696	1812	2056
S011	687	1358	1530	1964	729	1467	1552	1843	682	1358	1622	1964	695	1467	1582	1843
S011	665	1325	1516	1910	818	1580	1635	1939	694	1325	1561	1910	784	1580	1627	1939
S011	706	1330	1484	1852	796	1541	1610	1921	711	1330	1520	1852	787	1541	1644	1921
S011	718	1457	1678	2021	749	1504	1651	1965	709	1457	1682	2021	745	1504	1583	1965
S011	754	1397	1631	1975	822	1577	1697	1930	764	1397	1665	1975	803	1577	1583	1930
S011	740	1489	1631	2000	829	1573	1705	1975	755	1489	1622	2000	819	1573	1662	1975
S012	605	1140	1183	1559	705	1276	1228	1601	620	1140	1204	1559	695	1276	1312	1601
S012	587	1091	1137	1478	700	1199	1140	1533	603	1091	1159	1478	664	1199	1209	1533
S012	663	1161	1269	1556	680	1199	1175	1542	678	1161	1245	1556	667	1199	1239	1542
S012	621	1177	1226	1577	665	1231	1202	1572	658	1177	1197	1577	650	1231	1255	1572
S012	667	1172	1272	1627	675	1222	1212	1560	639	1172	1217	1627	658	1222	1269	1560
S012	636	1179	1283	1602	697	1281	1220	1643	653	1179	1280	1602	684	1281	1317	1643
S012	616	1168	1235	1561	678	1260	1255	1577	658	1168	1248	1561	681	1260	1282	1577
S012	610	1183	1270	1639	669	1251	1316	1610	634	1183	1234	1639	646	1251	1323	1610
S012	635	1191	1323	1659	655	1278	1233	1620	685	1191	1324	1659	666	1278	1310	1620
S012	600	1219	1301	1715	686	1310	1332	1657	617	1219	1404	1715	692	1310	1292	1657
S012	814	1526	1850	2152	934	1749	1909	2221	830	1526	1842	2152	928	1749	1906	2221
S012	697	1337	1564	1855	892	1627	1638	2037	784	1337	1588	1855	875	1627	1661	2037
S012	684	1316	1502	1820	733	1407	1491	1797	803	1316	1540	1820	732	1407	1526	1797
S012	681	1349	1512	1845	777	1435	1464	1804	722	1349	1502	1845	785	1435	1531	1804
S012	690	1349	1581	1870	779	1493	1525	1898	717	1349	1609	1870	777	1493	1572	1898
S012	674	1418	1601	1907	783	1481	1505	1890	745	1418	1613	1907	807	1481	1539	1890
S012	789	1487	1716	2043	807	1528	1590	1947	843	1487	1671	2043	786	1528	1624	1947
S013	653	1127	1258	1617	805	1415	1465	1743	641	1127	1197	1617	878	1415	1440	1743
S013	632	1141	1210	1644	713	1251	1304	1623	615	1141	1303	1644	770	1251	1343	1623
S013	625	1108	1285	1605	754	1240	1277	1606	634	1108	1300	1605	739	1240	1339	1606
S013	575	1152	1318	1645	744	1302	1295	1660	631	1152	1281	1645	768	1302	1335	1660
S013	649	1156	1323	1676	735	1288	1327	1644	665	1156	1326	1676	754	1288	1409	1644
S013	638	1128	1216	1636	756	1275	1320	1646	652	1128	1236	1636	767	1275	1346	1646
S013	653	1159	1286	1688	747	1310	1339	1674	657	1159	1307	1688	795	1310	1357	1674
S013	685	1193	1262	1731	738	1337	1343	1709	648	1193	1303	1731	751	1337	1351	1709
S013	673	1246	1334	1833	803	1367	1409	1752	641	1246	1340	1833	798	1367	1442	1752
S013	750	1273	1460	1831	977	1660	1736	2089	740	1273	1462	1831	984	1660	1750	2089
S013	701	1250	1435	1813	802	1399	1464	1761	696	1250	1467	1813	798	1399	1405	1761
S013	693	1228	1380	1788	871	1405	1509	1810	694	1228	1412	1788	848	1405	1523	1810
S013	711	1327	1481	1876	831	1456	1456	1865	756	1327	1460	1876	845	1456	1466	1865
S013	785	1322	1423	1902	831	1462	1578	1888	803	1322	1482	1902	830	1462	1538	1888
S013	653	1278	1459	1868	797	1404	1495	1818	702	1278	1483	1868	811	1404	1509	1818
S013	759	1393	1578	2027	845	1504	1471	1974	737	1393	1604	2027	848	1504	1546	1974
S014	680	1139	1245	1530	774	1261	1351	1653	701	1139	1213	1530	773	1261	1395	1653
S014	664	1130	1228	1537	648	1113	1225	1516	663	1130	1231	1537	645	1113	1239	1516
S014	709	1160	1218	1566	672	1134	1237	1558	718	1160	1230	1566	654	1134	1232	1558
S014	670	1178	1220	1574	697	1156	1302	1583	677	1178	1194	1574	670	1156	1293	1583
S014	664	1158	1201	1576	668	1129	1274	1546	688	1158	1201	1576	657	1129	1251	1546
S014	712	1171	1262	1571	718	1148	1296	1581	715	1171	1271	1571	691	1148	1291	1581
S014	709	1196	1314	1597	692	1171	1283	1595	691	1196	1236	1597	684	1171	1263	1595
S014	653	1189	1286	1588	679	1172	1325	1591	663	1189	1269	1588	670	1172	1292	1591
S014	730	1231	1362	1698	684	1186	1303	1618	710	1231	1360	1698	670	1186	1331	1618
S014	682	1237	1425	1734	744	1255	1322	1692	703	1237	1435	1734	715	1255	1425	1692
S014	857	1445	1627	1957	967	1627	1774	2165	863	1445	1571	1957	952	1627	1805	2165
S014	778	1390	1608	1919	776	1388	1535	1900	795	1390	1532	1919	782	1388	1562	1900
S014	797	1380	1579	1898	790	1369	1464	1889	779	1380	1583	1898	780	1369	1478	1889
S014	789	1408	1463	1901	791	1400	1550	1897	788	1408	1487	1901	779	1400	1589	1897
S014	741	1373	1548	1878	796	1351	1543	1868	742	1373	1527	1878	785	1351	1575	1868
S014	777	1384	1500	1927	794	1370	1565	1901	767	1384	1514	1927	801	1370	1591	1901
S014	801	1428	1643	1988	807	1433	1614	1953	791	1428	1605	1988	798	1433	1680	1953
S015	521	1077	1202	1539	784	1392	1419	1726	538	1077	1163	1539	799	1392	1424	1726
S015	498	1148	1210	1576	668	1246	1272	1595	646	1148	1222	1576	652	1246	1272	1595
S015	563	1183	1244	1674	652	1254	1271	1604	607	1183	1251	1674	662	1254	1300	1604
S015	529	1155	1257	1631	704	1289	1369	1634	667	1155	1218	1631	699	1289	1343	1634
S015	663	1206	1297	1741	695	1317	1314	1656	665	1206	1322	1741	700	1317	1326	1656
S015	562	1164	1274	1672	726	1377	1391	1720	646	1164	1259	1672	729	1377	1410	1720
S015	670	1196	1444	1751	724	1350	1389	1709	665	1196	1278	1751	737	1350	1363	1709
S015	684	1203	1287	1766	717	1405	1414	1770	685	1203	1323	1766	750	1405	1432	1770
S015	682	1224	1317	1771	743	1390	1377	1771	685	1224	1304	1771	708	1390	1396	1771
S015	552	1207	1279	1780	736	1400	1340	1728	629	1207	1398	1780	752	1400	1378	1728
S015	621	1321	1614	1989	955	1746	1819	2154	725	1321	1500	1989	962	1746	1783	2154
S015	566	1282	1559	1880	749	1528	1535	1968	672	1282	1395	1880	811	1528	1564	1968
S015	569	1306	1666	1997	780	1462	1502	1898	671	1306	1404	1997	778	1462	1506	1898
S015	610	1341	1577	1985	804	1548	1629	2006	692	1341	1430	1985	801	1548	1616	2006
S015	637	1362	1682	2033	810	1550	1674	2011	741	1362	1510	2033	813	1550	1654	2011
S015	681	1431	1661	2029	823	1589	1739	2096	747	1431	1562	2029	805	1589	1734	2096
S015	677	1425	1760	2159	843	1543	1629	2006	736	1425	1722	2159	794	1543	1630	2006

## Sheet: Straight_ICC(1,1)_Iizuka
Skater No.	Straight_R_onset_iizuka_1	Straight_R_TurnBack_iizuka_1	Straight_R_PushOn_iizuka_1	Straight_R_PushOff_iizuka_1	Straight_R_OffSet_iizuka_1	Straight_L_onset_iizuka_1	Straight_L_TurnBack_iizuka_1	Straight_L_PushOn_iizuka_1	Straight_L_PushOff_iizuka_1	Straight_L_OffSet_iizuka_1	Straight_R_onset_iizuka_2	Straight_R_TurnBack_iizuka_2	Straight_R_PushOn_iizuka_2	Straight_R_PushOff_iizuka_2	Straight_R_OffSet_iizuka_2	Straight_L_onset_iizuka_2	Straight_L_TurnBack_iizuka_2	Straight_L_PushOn_iizuka_2	Straight_L_PushOff_iizuka_2	Straight_L_OffSet_iizuka_2
S001	782	1258	1582	1660	1981	763	1083	1405	1522	1890	794	1268	1582	1606	1981	784	1113	1405	1483	1890
S001	801	1310	1645	1774	2103	830	1244	1514	1696	2041	813	1303	1645	1745	2103	846	1248	1514	1617	2041
S001	793	1301	1638	1766	2114	853	1242	1557	1737	2085	815	1313	1638	1730	2114	853	1223	1557	1777	2085
S001	806	1358	1662	1772	2164	888	1327	1612	1722	2125	821	1335	1662	1769	2164	881	1314	1612	1716	2125
S001	887	1433	1821	1960	2403	883	1391	1685	1880	2249	906	1444	1821	1991	2403	900	1382	1685	1784	2249
S001	893	1207	1769	1865	2305	980	1588	1856	1983	2389	921	1210	1769	1837	2305	1021	1591	1856	1984	2389
S001	862	1413	1769	1888	2249	808	1135	1521	1709	2067	899	1409	1769	1840	2249	831	1193	1521	1692	2067
S001	893	1427	1834	1960	2368	910	1380	1730	1918	2311	922	1426	1834	1960	2368	927	1386	1730	1920	2311
S001	891	1447	1812	1944	2357	928	1412	1768	1900	2362	883	1422	1812	1933	2357	946	1416	1768	1973	2362
S001	877	1554	1961	2154	2600	954	1331	1771	1998	2388	895	1544	1961	2152	2600	965	1343	1771	1911	2388
S002	846	1515	1750	1838	2223	692	1103	1505	1619	2021	916	1536	1750	1814	2223	678	1164	1505	1618	2021
S002	849	1542	1772	1897	2270	880	1291	1731	1791	2238	872	1512	1772	1863	2270	898	1322	1731	1828	2238
S002	901	1595	1828	1950	2354	844	1215	1767	1892	2302	926	1576	1828	1917	2354	870	1273	1767	1862	2302
S002	838	1491	1787	1918	2342	881	1235	1787	1953	2327	885	1504	1787	1855	2342	902	1305	1787	1904	2327
S002	883	1536	1847	1939	2411	924	1360	1830	1965	2380	918	1548	1847	1930	2411	930	1312	1830	1952	2380
S002	883	1569	1916	2061	2481	915	1375	1869	2004	2420	913	1605	1916	2049	2481	956	1348	1869	1999	2420
S002	886	1571	1915	1967	2434	987	1463	1937	2052	2491	921	1603	1915	1954	2434	984	1500	1937	2089	2491
S002	922	1788	2057	2177	2599	722	1211	1673	1882	2319	946	1789	2057	2126	2599	745	1211	1673	1870	2319
S002	907	1698	2005	2162	2588	968	1526	2009	2185	2573	917	1648	2005	2138	2588	1013	1519	2009	2153	2573
S002	935	1707	2022	2158	2652	973	1519	2031	2146	2604	955	1718	2022	2120	2652	962	1516	2031	2183	2604
S002	892	1676	2005	2184	2675	978	1449	2036	2239	2642	890	1677	2005	2263	2675	1000	1482	2036	2245	2642
S002	927	1749	2079	2175	2679	1046	1454	2116	2213	2719	986	1781	2079	2215	2679	1049	1411	2116	2254	2719
S003	888	1708	1862	2017	2353	714	1312	1719	1782	2228	943	1709	1862	2019	2353	714	1282	1719	1764	2228
S003	867	1653	1833	1908	2343	872	1436	1809	1880	2327	879	1654	1833	1852	2343	913	1463	1809	1894	2327
S003	889	1575	1732	1918	2366	877	1461	1790	1858	2255	903	1574	1732	1935	2366	892	1460	1790	1813	2255
S003	882	1669	1912	2139	2589	913	1565	1907	1982	2447	920	1652	1912	2108	2589	961	1554	1907	2079	2447
S003	961	1815	2084	2312	2770	1013	1732	2123	2263	2713	973	1817	2084	2342	2770	1044	1758	2123	2292	2713
S003	832	1612	1981	2176	2573	1069	1869	2125	2198	2635	854	1611	1981	2205	2573	1085	1885	2125	2221	2635
S003	997	1874	2125	2272	2718	879	1873	2072	2185	2665	1044	1877	2125	2332	2718	906	1877	2072	2173	2665
S003	1021	1946	2168	2387	2810	972	1773	2174	2251	2717	1039	1934	2168	2409	2810	995	1780	2174	2276	2717
S003	996	1819	2093	2244	2752	1088	1798	2209	2201	2729	1017	1788	2093	2291	2752	1135	1810	2209	2271	2729
S003	1024	1879	2139	2422	2854	1042	1838	2261	2381	2837	1046	1880	2139	2368	2854	1078	1814	2261	2358	2837
S004	807	1395	1553	1667	2047	734	1265	1513	1567	1987	831	1401	1553	1648	2047	746	1289	1513	1573	1987
S004	832	1391	1562	1670	2066	776	1294	1572	1616	2054	850	1401	1562	1658	2066	808	1281	1572	1668	2054
S004	816	1461	1605	1762	2122	786	1283	1580	1632	2087	904	1483	1605	1731	2122	802	1284	1580	1654	2087
S004	844	1446	1662	1783	2152	836	1313	1641	1709	2156	875	1463	1662	1720	2152	849	1297	1641	1692	2156
S004	864	1474	1660	1746	2178	824	1348	1640	1690	2136	890	1468	1660	1734	2178	836	1361	1640	1757	2136
S004	866	1525	1725	1805	2256	825	1362	1685	1725	2208	887	1548	1725	1824	2256	860	1402	1685	1746	2208
S004	868	1470	1836	1986	2391	888	1533	1759	1869	2338	908	1486	1836	1963	2391	907	1595	1759	1827	2338
S004	1026	1735	1880	1992	2412	802	1372	1735	1845	2338	1040	1739	1880	1964	2412	832	1382	1735	1844	2338
S004	872	1474	1753	1913	2320	894	1582	1811	1861	2295	909	1463	1753	1889	2320	924	1599	1811	1846	2295
S004	898	1588	1828	1977	2400	927	1470	1833	1911	2364	910	1585	1828	1962	2400	928	1458	1833	1906	2364
S004	869	1540	1803	1941	2370	950	1487	1841	1918	2397	928	1522	1803	1956	2370	967	1504	1841	1931	2397
S004	901	1666	1918	2112	2570	891	1569	1820	1961	2430	911	1658	1918	2084	2570	911	1579	1820	1971	2430
S005	1015	1776	2110	2162	2620	820	1435	1808	2013	2527	1033	1804	2110	2226	2620	838	1453	1808	2031	2527
S005	983	1672	1996	2094	2527	918	1506	1868	2111	2554	1020	1626	1996	2112	2527	955	1469	1868	2111	2554
S005	990	1568	1989	2174	2576	879	1531	1864	1999	2506	1026	1577	1989	2137	2576	879	1531	1864	2082	2506
S005	1057	1700	2168	2343	2845	989	1540	1970	2183	2749	1085	1672	2168	2343	2845	999	1559	1970	2302	2749
S005	1021	1820	2184	2307	2760	939	1591	2105	2307	2832	1076	1793	2184	2307	2760	921	1554	2105	2362	2832
S005	923	1428	2031	2117	2580	990	1926	2055	2137	2608	988	1346	2031	2144	2580	990	1953	2055	2192	2608
S005	1039	1886	2252	2354	2805	913	1712	2098	2249	2820	1087	1879	2252	2402	2805	934	1726	2098	2359	2820
S005	1078	1759	2215	2331	2846	943	1591	2028	2169	2728	1009	1759	2215	2399	2846	930	1570	2028	2293	2728
S005	1061	1853	2207	2411	2881	983	1720	2135	2367	2874	1061	1832	2207	2369	2881	976	1678	2135	2443	2874
S005	1065	1884	2250	2428	2862	918	1703	2129	2281	2849	1065	1850	2250	2469	2862	897	1724	2129	2398	2849
S006	918	1233	1716	1725	2219	745	1310	1502	1705	2128	933	1243	1716	1769	2219	773	1320	1502	1702	2128
S006	933	1425	1722	1756	2258	867	1335	1625	1674	2210	955	1461	1722	1760	2258	917	1309	1625	1609	2210
S006	957	1441	1714	1756	2265	891	1359	1657	1778	2248	959	1444	1714	1847	2265	938	1340	1657	1681	2248
S006	918	1426	1752	1829	2354	885	1369	1678	1861	2316	904	1441	1752	1916	2354	910	1406	1678	1798	2316
S006	1024	1572	1894	1992	2485	916	1488	1779	2029	2459	1018	1586	1894	2071	2485	969	1444	1779	1961	2459
S006	740	1490	1920	1982	2522	924	1505	1802	1892	2508	960	1497	1920	2054	2522	916	1526	1802	1835	2508
S006	1089	1485	1950	2097	2550	949	1513	1867	1949	2579	1081	1505	1950	2124	2550	969	1517	1867	2023	2579
S006	1021	1579	1892	1887	2435	823	1457	1731	1858	2366	1047	1577	1892	1923	2435	844	1463	1731	1840	2366
S006	1045	1672	1952	2011	2566	979	1493	1811	1982	2493	805	1689	1952	2002	2566	960	1490	1811	1956	2493
S006	1032	1421	1955	2079	2597	1007	1509	1876	2011	2598	1050	1428	1955	2102	2597	997	1495	1876	2049	2598
S006	1069	1684	1999	2104	2650	931	1552	1876	2022	2586	1040	1730	1999	2116	2650	945	1564	1876	2014	2586
S006	1035	1706	2084	2132	2753	985	1650	1957	2121	2709	1048	1723	2084	2277	2753	994	1636	1957	2126	2709
S007	1010	1646	2008	2130	2558	694	1234	1630	1815	2291	1052	1672	2008	2119	2558	753	1228	1630	1858	2291
S007	961	1445	1963	2000	2535	919	1484	1907	2080	2519	1030	1431	1963	2051	2535	931	1457	1907	2087	2519
S007	1007	1428	1997	2073	2602	948	1521	1947	2142	2547	1031	1501	1997	2121	2602	993	1572	1947	2098	2547
S007	1138	1675	2155	2285	2745	982	1595	2025	2289	2727	1137	1653	2155	2215	2745	976	1555	2025	2309	2727
S007	1081	1368	2154	2237	2773	965	1562	2027	2239	2699	1100	1432	2154	2259	2773	996	1595	2027	2236	2699
S007	1041	1372	1987	2080	2505	1008	1774	2095	2258	2670	1046	1367	1987	2079	2505	1003	1747	2095	2211	2670
S007	955	991	1870	1923	2452	951	1668	1868	1926	2382	962	1203	1870	1926	2452	936	1710	1868	1855	2382
S007	1057	1782	2276	2293	2806	821	1424	1856	2117	2569	1076	1772	2276	2316	2806	841	1419	1856	2128	2569
S007	1111	1799	2378	2407	2926	978	1672	2164	2317	2881	1128	1844	2378	2470	2926	998	1700	2164	2409	2881
S007	1169	1776	2508	2599	3141	1038	1667	2170	2414	2994	1189	1775	2508	2580	3141	1057	1683	2170	2427	2994
S007	1232	1737	2506	2506	3073	1109	1942	2389	2641	3191	1243	1684	2506	2489	3073	1126	1911	2389	2675	3191
S008	845	1347	1674	1754	2190	788	826	1606	1629	2116	856	1362	1674	1819	2190	783	871	1606	1666	2116
S008	844	1484	1739	1866	2276	818	968	1671	1746	2207	874	1517	1739	1878	2276	844	988	1671	1775	2207
S008	882	1503	1751	1848	2268	881	1182	1760	1778	2297	944	1490	1751	1883	2268	894	1151	1760	1857	2297
S008	835	1512	1726	1776	2230	830	1237	1712	1789	2230	877	1503	1726	1736	2230	862	1231	1712	1809	2230
S008	825	1484	1720	1747	2217	839	1253	1722	1736	2219	871	1458	1720	1723	2217	857	1242	1722	1756	2219
S008	816	1374	1694	1813	2230	859	1336	1694	1687	2185	807	1353	1694	1819	2230	887	1320	1694	1754	2185
S008	975	1684	2015	2136	2554	841	1567	1885	1927	2410	991	1694	2015	2127	2554	879	1574	1885	1987	2410
S008	980	1851	2112	2275	2705	985	1571	2042	2033	2604	964	1832	2112	2238	2705	982	1560	2042	2138	2604
S008	1000	1748	2112	2259	2701	1010	1698	2162	2247	2721	1020	1784	2112	2245	2701	1035	1689	2162	2261	2721
S008	1025	1837	2169	2386	2827	1052	1671	2135	2273	2754	1059	1851	2169	2346	2827	1082	1653	2135	2280	2754
S009	810	1226	1575	1692	2030	725	933	1392	1545	1867	813	1263	1575	1686	2030	752	933	1392	1501	1867
S009	845	1297	1616	1705	2064	827	1230	1566	1674	2057	840	1308	1616	1748	2064	856	1165	1566	1664	2057
S009	838	1204	1621	1749	2101	820	1189	1586	1687	2070	823	1199	1621	1759	2101	864	1174	1586	1664	2070
S009	852	1210	1653	1770	2150	833	1176	1640	1714	2116	861	1164	1653	1788	2150	859	1152	1640	1711	2116
S009	888	1146	1701	1842	2186	807	1190	1686	1809	2197	877	1189	1701	1822	2186	886	1144	1686	1773	2197
S009	882	1262	1718	1885	2244	862	1184	1675	1863	2177	885	1225	1718	1830	2244	875	1185	1675	1822	2177
S009	910	1218	1759	1921	2257	889	1225	1759	1904	2298	936	1211	1759	1909	2257	910	1220	1759	1899	2298
S009	912	1440	1785	1897	2331	755	1203	1627	1808	2196	931	1447	1785	1889	2331	768	1221	1627	1807	2196
S009	928	1426	1827	1981	2394	915	1359	1775	1977	2360	952	1399	1827	2036	2394	942	1337	1775	1905	2360
S009	918	1330	1858	1993	2447	908	1378	1823	1938	2383	922	1352	1858	2000	2447	922	1364	1823	1909	2383
S009	921	1558	1945	2140	2563	944	1352	1888	2028	2460	936	1579	1945	2089	2563	955	1339	1888	2062	2460
S010	889	1422	1707	2002	2365	833	1341	1693	1721	2240	865	1454	1707	1939	2365	852	1348	1693	1781	2240
S010	903	1532	1833	2040	2512	908	1513	1869	2021	2489	916	1557	1833	2083	2512	925	1545	1869	2041	2489
S010	956	1609	1904	2149	2608	903	1524	1890	2185	2544	986	1575	1904	2133	2608	894	1524	1890	2133	2544
S010	928	1549	1865	2106	2551	931	1520	1902	2117	2532	929	1590	1865	2117	2551	973	1541	1902	2130	2532
S010	966	1547	1884	2152	2610	972	1682	1940	2166	2579	1022	1548	1884	2189	2610	992	1632	1940	2200	2579
S010	961	1558	1891	2179	2644	941	1619	1980	2240	2637	1004	1572	1891	2181	2644	984	1604	1980	2224	2637
S010	946	1519	1816	2011	2413	998	1683	1993	2143	2603	973	1551	1816	1933	2413	1043	1662	1993	2303	2603
S010	973	1779	2094	2312	2761	833	1327	1894	2085	2575	778	1817	2094	2375	2761	857	1318	1894	2131	2575
S010	1013	1798	2139	2443	2923	1021	1709	2094	2344	2767	853	1783	2139	2492	2923	1043	1738	2094	2316	2767
S010	1042	1800	2140	2391	2943	1088	1733	2198	2475	2977	1070	1848	2140	2447	2943	1098	1814	2198	2517	2977
S010	1002	1663	2068	2367	2909	1068	1788	2126	2449	2877	1032	1693	2068	2437	2909	1075	1798	2126	2376	2877
S011	816	1174	1702	1812	2147	736	829	1399	1639	2020	797	1137	1702	1835	2147	740	896	1399	1685	2020
S011	891	1042	1767	1859	2236	838	1311	1550	1805	2163	844	1028	1767	1845	2236	822	1290	1550	1869	2163
S011	877	1264	1803	1881	2294	875	1377	1661	1943	2274	848	1362	1803	1886	2294	871	1367	1661	1945	2274
S011	899	1021	1793	1895	2281	931	1376	1683	1942	2294	886	1060	1793	1923	2281	938	1406	1683	1966	2294
S011	933	1098	1837	1894	2319	895	1404	1711	1985	2308	891	1083	1837	1983	2319	930	1453	1711	1967	2308
S011	922	1087	1801	1933	2313	910	1533	1709	1942	2277	903	995	1801	1922	2313	908	1541	1709	1972	2277
S011	860	1018	1677	1814	2179	898	1536	1719	1923	2244	858	1050	1677	1821	2179	916	1495	1719	1871	2244
S011	992	1852	1951	2052	2448	837	1389	1702	1985	2376	1008	1835	1951	2076	2448	841	1387	1702	1957	2376
S011	890	1662	1881	2001	2369	870	1397	1730	1992	2327	922	1709	1881	2022	2369	906	1412	1730	1967	2327
S011	867	1658	1883	1965	2428	958	1441	1783	2068	2388	834	1677	1883	2022	2428	965	1479	1783	2033	2388
S011	961	1695	1928	2014	2412	947	1493	1811	2076	2457	928	1723	1928	2100	2412	946	1460	1811	2039	2457
S011	920	1522	1932	2049	2496	917	1526	1772	2053	2371	941	1552	1932	2082	2496	931	1509	1772	2064	2371
S012	860	1362	1613	1850	2165	712	1200	1475	1615	1999	878	1365	1613	1870	2165	735	1185	1475	1589	1999
S012	846	1369	1634	1885	2230	814	1287	1612	1824	2140	880	1421	1634	1899	2230	838	1251	1612	1756	2140
S012	853	1498	1695	1849	2217	874	1347	1721	1935	2260	844	1477	1695	1808	2217	910	1351	1721	1874	2260
S012	901	1481	1695	1904	2241	901	1338	1702	1862	2270	894	1500	1695	1931	2241	945	1313	1702	1918	2270
S012	889	1513	1748	2007	2285	839	1255	1654	1957	2259	875	1499	1748	1903	2285	869	1255	1654	1980	2259
S012	898	1443	1695	1880	2252	867	1361	1691	1849	2232	921	1417	1695	1830	2252	887	1373	1691	1906	2232
S012	875	1241	1640	1822	2188	900	1359	1708	1889	2176	872	1249	1640	1809	2188	913	1381	1708	1794	2176
S012	923	1582	1857	2096	2420	808	1273	1643	1875	2259	941	1592	1857	2106	2420	842	1260	1643	1911	2259
S012	956	1702	1952	2160	2535	945	1485	1864	2150	2513	987	1662	1952	2192	2535	961	1483	1864	2094	2513
S012	974	1664	1967	2222	2561	954	1468	1834	2102	2472	998	1705	1967	2227	2561	978	1444	1834	2111	2472
S012	1003	1706	2006	2302	2634	1016	1618	1967	2239	2630	1016	1731	2006	2221	2634	1028	1607	1967	2249	2630
S012	941	1731	1987	2252	2634	1014	1641	1926	2231	2550	960	1779	1987	2285	2634	1041	1603	1926	2173	2550
S013	865	1338	1755	2005	2387	783	1187	1553	1805	2190	866	1380	1755	2086	2387	804	1200	1553	1691	2190
S013	922	1395	1849	2041	2467	925	1470	1831	2007	2434	930	1388	1849	2086	2467	946	1411	1831	1988	2434
S013	936	1473	1899	2111	2556	971	1435	1852	2093	2467	969	1483	1899	2162	2556	1025	1464	1852	2084	2467
S013	903	1462	1918	2150	2569	1018	1495	1939	2160	2600	937	1460	1918	2158	2569	1071	1502	1939	2224	2600
S013	936	1495	2005	2241	2705	998	1522	1950	2275	2654	1021	1507	2005	2278	2705	1019	1526	1950	2232	2654
S013	969	1485	1898	2159	2481	985	1563	1966	2195	2646	978	1446	1898	2052	2481	998	1583	1966	2211	2646
S013	1020	1520	1985	2219	2636	828	1349	1753	1995	2402	1044	1540	1985	2221	2636	858	1402	1753	1953	2402
S013	1013	1540	1943	2239	2615	990	1560	1955	2184	2614	997	1568	1943	2215	2615	1031	1603	1955	2188	2614
S013	978	1645	2079	2306	2737	995	1516	1951	2177	2642	1032	1673	2079	2292	2737	985	1550	1951	2183	2642
S013	989	1698	2122	2387	2787	1100	1665	2095	2320	2766	1008	1724	2122	2371	2787	1097	1689	2095	2316	2766
S014	951	1460	1707	1890	2225	753	1083	1526	1685	2051	961	1457	1707	1861	2225	754	1167	1526	1672	2051
S014	956	1450	1722	1981	2293	860	1355	1727	1892	2238	976	1508	1722	1949	2293	860	1328	1727	1915	2238
S014	906	1466	1730	1889	2267	930	1303	1739	1912	2279	941	1455	1730	1877	2267	944	1302	1739	1899	2279
S014	940	1500	1772	2001	2311	895	1354	1760	1884	2295	923	1492	1772	1942	2311	923	1355	1760	1832	2295
S014	974	1475	1811	2035	2374	923	1389	1773	1933	2331	980	1531	1811	2018	2374	978	1346	1773	1924	2331
S014	922	1388	1759	2026	2359	936	1423	1796	1896	2319	920	1434	1759	2021	2359	988	1410	1796	1906	2319
S014	843	957	1635	1803	2184	954	1577	1792	1864	2255	819	984	1635	1801	2184	964	1570	1792	1790	2255
S014	1048	1737	2016	2172	2525	806	1333	1747	1940	2380	1063	1738	2016	2151	2525	819	1397	1747	1948	2380
S014	1072	1695	2000	2212	2631	980	1576	1912	2130	2512	1092	1774	2000	2187	2631	993	1627	1912	2088	2512
S014	1021	1688	2017	2199	2584	1086	1554	2024	2253	2632	1043	1697	2017	2213	2584	1118	1490	2024	2096	2632
S014	1056	1712	2009	2341	2686	1002	1631	1975	2169	2563	1089	1695	2009	2266	2686	1026	1605	1975	2218	2563
S015	896	1508	1708	1951	2298	733	1257	1540	1828	2206	993	1484	1708	1845	2298	747	1263	1540	1754	2206
S015	917	1522	1737	2005	2389	812	1295	1644	1954	2325	915	1526	1737	1922	2389	804	1355	1644	1837	2325
S015	893	1612	1805	2076	2496	805	1410	1720	1995	2387	927	1642	1805	2089	2496	820	1440	1720	2016	2387
S015	911	1616	1846	2134	2573	925	1496	1841	2101	2520	936	1624	1846	2140	2573	937	1523	1841	2082	2520
S015	952	1678	1901	2195	2632	952	1516	1882	2269	2600	1073	1659	1901	2123	2632	956	1559	1882	2230	2600
S015	907	1667	1847	2077	2476	980	1504	1900	2109	2552	886	1669	1847	2073	2476	990	1514	1900	2100	2552
S015	1025	1804	2017	2299	2674	829	1528	1807	2178	2582	1167	1848	2017	2144	2674	868	1522	1807	2155	2582
S015	953	1684	1901	2249	2609	1000	1596	1885	2182	2556	999	1715	1901	2135	2609	1012	1659	1885	2148	2556
S015	930	1731	1948	2333	2724	992	1616	1939	2191	2641	923	1708	1948	2218	2724	1072	1596	1939	2208	2641
S015	964	1846	2089	2410	2905	1007	1657	2042	2421	2882	967	1834	2089	2351	2905	1061	1681	2042	2521	2882

## Sheet: Curve_ICC(1,1)_Iizuka
Skater No.	Curve_R_onset_iizuka_1	Curve_R_PushOn_iizuka_1	Curve_R_PushOff_iizuka_1	Curve_R_OffSet_iizuka_1	Curve_L_onset_iizuka_1	Curve_L_PushOn_iizuka_1	Curve_L_PushOff_iizuka_1	Curve_L_OffSet_iizuka_1	Curve_R_onset_iizuka_2	Curve_R_PushOn_iizuka_2	Curve_R_PushOff_iizuka_2	Curve_R_OffSet_iizuka_2	Curve_L_onset_iizuka_2	Curve_L_PushOn_iizuka_2	Curve_L_PushOff_iizuka_2	Curve_L_OffSet_iizuka_2
S001	529	1125	1194	1461	816	1307	1347	1572	565	1125	1150	1461	830	1307	1346	1572
S001	546	1058	1131	1410	736	1153	1186	1421	567	1058	1074	1410	747	1153	1185	1421
S001	554	1060	1139	1389	706	1128	1170	1418	551	1060	1119	1389	720	1128	1167	1418
S001	576	1109	1141	1460	706	1096	1163	1419	582	1109	1081	1460	730	1096	1204	1419
S001	581	1128	1159	1464	719	1149	1236	1514	611	1128	1101	1464	723	1149	1179	1514
S001	643	1217	1335	1588	670	1164	1214	1474	661	1217	1246	1588	697	1164	1179	1474
S001	574	1146	1192	1524	788	1195	1292	1560	588	1146	1147	1524	781	1195	1306	1560
S001	582	1152	1207	1519	714	1167	1271	1506	587	1152	1129	1519	727	1167	1243	1506
S001	568	1129	1167	1495	753	1158	1183	1478	583	1129	1108	1495	744	1158	1183	1478
S001	592	1205	1251	1599	774	1204	1238	1538	611	1205	1205	1599	764	1204	1254	1538
S001	688	1338	1416	1817	972	1704	1762	2061	691	1338	1325	1817	1028	1704	1727	2061
S001	665	1307	1361	1769	799	1412	1445	1759	673	1307	1307	1769	814	1412	1433	1759
S001	715	1305	1380	1768	821	1421	1442	1815	719	1305	1322	1768	847	1421	1401	1815
S001	672	1296	1399	1752	763	1362	1402	1739	678	1296	1337	1752	799	1362	1353	1739
S001	695	1303	1297	1737	805	1370	1432	1777	709	1303	1296	1737	827	1370	1421	1777
S001	708	1362	1404	1783	778	1376	1380	1729	715	1362	1382	1783	785	1376	1363	1729
S001	713	1355	1396	1837	818	1382	1458	1802	723	1355	1374	1837	815	1382	1449	1802
S002	591	1239	1285	1672	825	1533	1567	1900	599	1239	1333	1672	830	1533	1573	1900
S002	629	1154	1234	1572	635	1269	1312	1605	642	1154	1199	1572	644	1269	1295	1605
S002	638	1198	1218	1616	643	1261	1272	1603	609	1198	1197	1616	671	1261	1280	1603
S002	659	1193	1199	1609	669	1265	1306	1613	635	1193	1223	1609	668	1265	1257	1613
S002	671	1223	1251	1643	628	1270	1290	1623	637	1223	1205	1643	666	1270	1327	1623
S002	721	1306	1326	1748	659	1340	1360	1720	697	1306	1296	1748	675	1340	1346	1720
S002	651	1239	1296	1667	664	1326	1342	1679	664	1239	1314	1667	669	1326	1289	1679
S002	677	1278	1330	1718	679	1339	1381	1712	701	1278	1310	1718	674	1339	1365	1712
S002	669	1260	1314	1736	652	1347	1338	1703	666	1260	1255	1736	676	1347	1347	1703
S002	683	1286	1344	1733	651	1374	1369	1748	665	1286	1316	1733	677	1374	1358	1748
S002	621	1332	1381	1837	937	1726	1726	2111	723	1332	1375	1837	952	1726	1751	2111
S002	712	1394	1479	1921	690	1445	1479	1871	731	1394	1474	1921	705	1445	1411	1871
S002	677	1372	1422	1892	719	1495	1543	1912	701	1372	1500	1892	725	1495	1486	1912
S002	584	1381	1458	1865	735	1477	1502	1901	654	1381	1508	1865	740	1477	1493	1901
S002	669	1381	1471	1873	691	1470	1465	1891	708	1381	1469	1873	730	1470	1501	1891
S002	631	1420	1491	1930	692	1486	1467	1879	716	1420	1533	1930	712	1486	1474	1879
S002	636	1407	1539	1914	691	1477	1494	1877	686	1407	1559	1914	706	1477	1366	1877
S002	643	1448	1539	1942	786	1537	1567	1957	746	1448	1554	1942	802	1537	1518	1957
S003	645	1177	1324	1625	765	1366	1417	1757	640	1177	1345	1625	796	1366	1416	1757
S003	619	1055	1244	1514	675	1219	1233	1515	632	1055	1200	1514	675	1219	1225	1515
S003	651	1143	1256	1576	679	1279	1324	1585	676	1143	1261	1576	700	1279	1277	1585
S003	648	1189	1306	1670	673	1272	1305	1635	641	1189	1338	1670	673	1272	1232	1635
S003	637	1115	1215	1598	664	1278	1235	1597	631	1115	1242	1598	681	1278	1172	1597
S003	605	1098	1170	1546	680	1260	1238	1579	617	1098	1116	1546	676	1260	1201	1579
S003	632	1162	1237	1657	674	1252	1191	1614	646	1162	1274	1657	664	1252	1240	1614
S003	642	1177	1361	1714	673	1291	1203	1671	624	1177	1373	1714	693	1291	1210	1671
S003	621	1280	1327	1788	735	1385	1300	1742	614	1280	1311	1788	778	1385	1294	1742
S003	688	1289	1547	1934	1074	1810	1846	2251	686	1289	1537	1934	1082	1810	1845	2251
S003	591	1372	1607	1979	774	1519	1439	1987	615	1372	1539	1979	791	1519	1530	1987
S003	707	1323	1504	1902	731	1508	1497	1928	692	1323	1463	1902	780	1508	1519	1928
S003	706	1265	1465	1878	748	1439	1469	1848	694	1265	1457	1878	772	1439	1374	1848
S003	653	1350	1581	1976	750	1501	1522	1936	679	1350	1611	1976	755	1501	1518	1936
S003	791	1603	1882	2299	790	1657	1662	2121	808	1603	1884	2299	795	1657	1679	2121
S004	526	1025	1104	1505	794	1354	1332	1646	541	1025	1135	1505	805	1354	1313	1646
S004	526	1028	1064	1491	660	1210	1151	1474	542	1028	1067	1491	674	1210	1122	1474
S004	521	1058	1166	1578	665	1235	1229	1552	549	1058	1143	1578	672	1235	1205	1552
S004	522	1046	1127	1561	659	1245	1210	1552	520	1046	1139	1561	660	1245	1202	1552
S004	513	1000	1098	1503	693	1215	1176	1509	499	1000	1084	1503	700	1215	1199	1509
S004	523	1021	1127	1608	662	1249	1139	1521	545	1021	1234	1608	723	1249	1171	1521
S004	447	971	1119	1561	734	1277	1238	1567	469	971	1115	1561	768	1277	1190	1567
S004	472	986	1144	1651	719	1338	1304	1622	492	986	1197	1651	750	1338	1267	1622
S004	467	990	1160	1586	750	1347	1281	1627	476	990	1121	1586	781	1347	1220	1627
S004	596	1157	1437	1864	939	1628	1585	1980	587	1157	1438	1864	977	1628	1628	1980
S004	463	1151	1373	1883	765	1459	1443	1837	482	1151	1414	1883	796	1459	1399	1837
S004	506	1085	1303	1735	804	1450	1387	1817	503	1085	1250	1735	847	1450	1361	1817
S004	534	1160	1424	1857	762	1410	1408	1772	519	1160	1458	1857	805	1410	1399	1772
S004	489	1145	1292	1751	821	1486	1486	1884	485	1145	1296	1751	824	1486	1458	1884
S004	451	1291	1529	1963	731	1423	1390	1814	605	1291	1513	1963	763	1423	1390	1814
S004	482	1233	1385	1853	799	1475	1470	1904	490	1233	1405	1853	813	1475	1511	1904
S005	606	1363	1464	1834	770	1546	1586	1919	627	1363	1433	1834	821	1546	1616	1919
S005	611	1411	1519	1878	751	1459	1505	1835	642	1411	1530	1878	782	1459	1463	1835
S005	746	1391	1469	1863	754	1489	1518	1894	623	1391	1511	1863	826	1489	1456	1894
S005	732	1413	1527	1881	750	1443	1452	1868	639	1413	1558	1881	781	1443	1493	1868
S005	803	1433	1536	1893	761	1465	1505	1901	772	1433	1495	1893	761	1465	1453	1901
S005	686	1417	1543	1899	761	1444	1411	1843	686	1417	1512	1899	802	1444	1432	1843
S005	739	1403	1472	1897	756	1515	1499	1921	718	1403	1472	1897	776	1515	1561	1921
S005	742	1493	1486	2039	766	1537	1571	1959	742	1493	1486	2039	787	1537	1561	1959
S005	810	1561	1615	2065	728	1605	1647	2022	779	1561	1584	2065	759	1605	1657	2022
S005	918	1744	1882	2347	959	1867	1888	2443	729	1744	1942	2347	985	1867	1888	2443
S005	946	1676	1841	2311	813	1720	1829	2253	791	1676	1867	2311	831	1720	1820	2253
S005	899	1719	1863	2357	867	1785	1891	2368	821	1719	1931	2357	867	1785	1960	2368
S005	882	1690	1717	2287	874	1801	1881	2373	891	1690	1881	2287	857	1801	1907	2373
S005	876	1875	1814	2380	764	1759	1875	2340	876	1875	1848	2380	773	1759	1849	2340
S005	888	1820	1818	2396	825	1751	1832	2280	811	1820	1895	2396	851	1751	1884	2280
S006	588	1102	1407	1601	769	1467	1515	1779	577	1102	1317	1601	813	1467	1485	1779
S006	573	1059	1345	1496	691	1229	1215	1505	585	1059	1144	1496	669	1229	1203	1505
S006	622	1140	1456	1598	678	1255	1296	1569	604	1140	1249	1598	679	1255	1256	1569
S006	657	1169	1484	1666	722	1279	1367	1627	606	1169	1269	1666	737	1279	1339	1627
S006	651	1204	1465	1650	660	1321	1319	1655	601	1204	1204	1650	693	1321	1287	1655
S006	681	1254	1380	1733	739	1386	1371	1712	664	1254	1283	1733	785	1386	1353	1712
S006	622	1237	1422	1779	707	1346	1393	1702	618	1237	1297	1779	708	1346	1397	1702
S006	563	1181	1336	1709	726	1403	1371	1744	560	1181	1248	1709	753	1403	1347	1744
S006	608	1214	1395	1736	709	1392	1341	1698	598	1214	1278	1736	765	1392	1358	1698
S006	730	1319	1570	1881	909	1732	1709	2074	676	1319	1494	1881	950	1732	1638	2074
S006	663	1353	1564	2451	717	1536	1490	1904	689	1353	1498	2451	786	1536	1483	1904
S006	235	931	1196	1567	836	1651	1588	2037	243	931	1146	1567	879	1651	1567	2037
S006	758	1410	1759	2082	862	1621	1635	2046	758	1410	1662	2082	864	1621	1596	2046
S006	699	1377	1647	2055	859	1633	1598	2039	690	1377	1611	2055	875	1633	1581	2039
S006	835	1484	1749	2108	849	1714	1649	2121	804	1484	1630	2108	858	1714	1607	2121
S006	736	1453	1563	2048	906	1667	1665	2062	710	1453	1579	2048	915	1667	1603	2062
S007	624	1267	1341	1672	785	1359	1463	1773	614	1267	1255	1672	813	1359	1484	1773
S007	621	1256	1290	1645	706	1246	1335	1660	646	1256	1256	1645	692	1246	1302	1660
S007	678	1313	1331	1725	691	1256	1328	1684	695	1313	1346	1725	674	1256	1304	1684
S007	533	1279	1372	1679	684	1248	1354	1702	591	1279	1366	1679	715	1248	1283	1702
S007	750	1355	1443	1762	652	1287	1377	1712	730	1355	1391	1762	665	1287	1378	1712
S007	608	1318	1431	1728	714	1332	1351	1745	610	1318	1384	1728	730	1332	1380	1745
S007	671	1347	1493	1750	695	1331	1364	1766	700	1347	1360	1750	709	1331	1380	1766
S007	639	1312	1356	1727	695	1300	1324	1731	643	1312	1345	1727	719	1300	1370	1731
S007	734	1339	1412	1774	698	1357	1383	1716	734	1339	1405	1774	703	1357	1374	1716
S007	654	1352	1444	1837	707	1356	1409	1784	684	1352	1407	1837	742	1356	1434	1784
S007	810	1730	1993	2311	962	1868	2002	2473	828	1730	1893	2311	1023	1868	2014	2473
S007	700	1519	1818	2054	855	1605	1758	2151	711	1519	1620	2054	854	1605	1726	2151
S007	711	1564	1750	2118	776	1545	1686	2048	741	1564	1723	2118	796	1545	1641	2048
S007	822	1675	1876	2242	828	1642	1774	2240	845	1675	1744	2242	859	1642	1759	2240
S007	752	1678	1763	2158	868	1680	1807	2192	732	1678	1714	2158	896	1680	1777	2192
S007	781	1580	1612	2011	848	1591	1643	2101	759	1580	1677	2011	861	1591	1623	2101
S007	719	1656	1780	2160	768	1502	1628	2017	758	1656	1649	2160	770	1502	1597	2017
S008	532	1078	1137	1524	752	1237	1350	1606	539	1078	1159	1524	769	1237	1311	1606
S008	486	1043	1084	1456	706	1175	1250	1503	521	1043	1020	1456	712	1175	1229	1503
S008	589	1065	1194	1547	688	1162	1219	1479	571	1065	1131	1547	707	1162	1154	1479
S008	528	1043	1153	1504	721	1226	1299	1554	504	1043	1072	1504	734	1226	1302	1554
S008	563	1045	1167	1500	692	1210	1237	1526	558	1045	1083	1500	720	1210	1262	1526
S008	608	1105	1247	1593	685	1231	1250	1556	624	1105	1149	1593	692	1231	1242	1556
S008	588	1068	1213	1579	715	1254	1266	1558	554	1068	1140	1579	719	1254	1347	1558
S008	595	1125	1321	1675	730	1299	1294	1620	619	1125	1222	1675	745	1299	1287	1620
S008	654	1172	1359	1721	743	1388	1375	1672	648	1172	1251	1721	751	1388	1353	1672
S008	717	1353	1534	1964	924	1611	1660	2045	721	1353	1519	1964	959	1611	1593	2045
S008	608	1273	1570	1933	809	1458	1551	1905	623	1273	1531	1933	815	1458	1524	1905
S008	626	1291	1471	1857	802	1526	1592	1953	631	1291	1382	1857	872	1526	1629	1953
S008	673	1391	1640	2013	752	1458	1574	1920	674	1391	1590	2013	805	1458	1473	1920
S008	638	1386	1654	2008	832	1473	1504	1962	665	1386	1539	2008	861	1473	1522	1962
S008	695	1416	1533	2003	848	1520	1612	2002	695	1416	1514	2003	861	1520	1543	2002
S009	655	1175	1211	1524	768	1334	1405	1664	700	1175	1268	1524	769	1334	1348	1664
S009	510	1105	1155	1458	660	1141	1241	1477	498	1105	1252	1458	644	1141	1181	1477
S009	511	1080	1164	1470	635	1088	1127	1414	507	1080	1168	1470	613	1088	1150	1414
S009	565	1100	1203	1488	680	1161	1253	1493	555	1100	1112	1488	707	1161	1171	1493
S009	618	1139	1255	1520	663	1176	1236	1538	585	1139	1194	1520	670	1176	1196	1538
S009	549	1123	1235	1507	657	1151	1246	1494	562	1123	1213	1507	660	1151	1146	1494
S009	583	1153	1284	1529	663	1164	1196	1511	604	1153	1276	1529	695	1164	1211	1511
S009	586	1128	1191	1482	701	1179	1217	1525	552	1128	1223	1482	691	1179	1187	1525
S009	620	1133	1209	1502	684	1159	1144	1480	599	1133	1280	1502	664	1159	1118	1480
S009	578	1138	1239	1518	656	1151	1180	1485	594	1138	1296	1518	691	1151	1125	1485
S009	568	1163	1269	1565	695	1197	1219	1546	584	1163	1296	1565	704	1197	1262	1546
S009	654	1293	1461	1770	893	1502	1565	1923	670	1293	1505	1770	953	1502	1564	1923
S009	652	1286	1391	1764	771	1331	1416	1775	647	1286	1439	1764	802	1331	1405	1775
S009	642	1281	1482	1756	703	1364	1368	1749	613	1281	1465	1756	723	1364	1308	1749
S009	606	1276	1460	1753	715	1337	1353	1747	638	1276	1464	1753	729	1337	1383	1747
S009	668	1322	1535	1794	789	1365	1421	1790	649	1322	1475	1794	781	1365	1426	1790
S009	655	1279	1441	1745	740	1347	1385	1768	654	1279	1411	1745	772	1347	1418	1768
S009	684	1330	1470	1807	746	1365	1377	1773	673	1330	1448	1807	777	1365	1405	1773
S009	664	1361	1504	1864	774	1376	1486	1817	673	1361	1560	1864	742	1376	1483	1817
S010	551	1143	1204	1564	750	1351	1250	1608	534	1143	1237	1564	779	1351	1420	1608
S010	632	1214	1333	1666	699	1365	1392	1679	633	1214	1366	1666	710	1365	1392	1679
S010	667	1202	1393	1660	697	1338	1351	1646	702	1202	1404	1660	766	1338	1386	1646
S010	652	1174	1217	1630	737	1329	1317	1636	632	1174	1345	1630	710	1329	1361	1636
S010	627	1195	1353	1672	665	1333	1327	1655	634	1195	1285	1672	654	1333	1367	1655
S010	673	1206	1350	1660	728	1356	1317	1687	697	1206	1337	1660	745	1356	1395	1687
S010	634	1214	1392	1718	694	1338	1323	1652	710	1214	1423	1718	731	1338	1392	1652
S010	642	1155	1360	1683	728	1378	1341	1673	665	1155	1316	1683	731	1378	1402	1673
S010	669	1229	1467	1803	732	1444	1377	1743	655	1229	1388	1803	762	1444	1382	1743
S010	672	1227	1503	1868	771	1501	1465	1748	711	1227	1454	1868	785	1501	1342	1748
S010	722	1320	1642	1967	903	1742	1701	2074	710	1320	1630	1967	924	1742	1708	2074
S010	667	1335	1771	2042	765	1632	1595	1983	644	1335	1676	2042	770	1632	1638	1983
S010	697	1382	1778	2093	838	1693	1725	2068	719	1382	1689	2093	884	1693	1648	2068
S010	709	1420	1644	1966	843	1730	1714	2146	732	1420	1569	1966	881	1730	1676	2146
S010	759	1404	1807	2071	737	1609	1584	1957	759	1404	1710	2071	749	1609	1555	1957
S010	680	1354	1696	2019	812	1630	1602	1968	671	1354	1632	2019	837	1630	1580	1968
S010	661	1374	1766	2052	852	1700	1747	2035	728	1374	1678	2052	883	1700	1740	2035
S010	714	1409	1754	2125	866	1697	1737	2097	762	1409	1671	2125	892	1697	1760	2097
S011	572	1157	1210	1556	746	1349	1348	1653	540	1157	1191	1556	741	1349	1347	1653
S011	521	1107	1159	1494	648	1238	1236	1514	553	1107	1132	1494	676	1238	1245	1514
S011	547	1092	1235	1502	618	1213	1199	1485	556	1092	1207	1502	640	1213	1163	1485
S011	608	1128	1224	1526	639	1227	1198	1535	587	1128	1156	1526	642	1227	1239	1535
S011	630	1141	1175	1547	638	1231	1268	1546	621	1141	1117	1547	658	1231	1301	1546
S011	595	1156	1190	1593	611	1200	1256	1545	589	1156	1231	1593	627	1200	1159	1545
S011	630	1126	1232	1566	651	1286	1260	1575	621	1126	1217	1566	661	1286	1257	1575
S011	591	1111	1207	1557	674	1271	1262	1529	615	1111	1166	1557	683	1271	1206	1529
S011	582	1114	1263	1556	679	1306	1296	1586	554	1114	1160	1556	724	1306	1247	1586
S011	653	1263	1399	1701	649	1286	1265	1590	623	1263	1312	1701	643	1286	1258	1590
S011	725	1333	1597	1865	921	1696	1768	2056	741	1333	1440	1865	955	1696	1750	2056
S011	673	1358	1633	1964	690	1467	1574	1843	699	1358	1591	1964	730	1467	1541	1843
S011	704	1325	1601	1910	779	1580	1663	1939	679	1325	1563	1910	775	1580	1594	1939
S011	719	1330	1610	1852	784	1541	1594	1921	689	1330	1452	1852	803	1541	1607	1921
S011	730	1457	1734	2021	701	1504	1611	1965	732	1457	1624	2021	722	1504	1557	1965
S011	767	1397	1701	1975	775	1577	1609	1930	784	1397	1579	1975	813	1577	1616	1930
S011	736	1489	1608	2000	795	1573	1655	1975	744	1489	1588	2000	843	1573	1686	1975
S012	618	1140	1292	1559	721	1276	1280	1601	599	1140	1278	1559	712	1276	1263	1601
S012	593	1091	1167	1478	683	1199	1292	1533	600	1091	1142	1478	736	1199	1186	1533
S012	671	1161	1244	1556	669	1199	1228	1542	673	1161	1233	1556	681	1199	1268	1542
S012	656	1177	1222	1577	640	1231	1249	1572	669	1177	1210	1577	617	1231	1278	1572
S012	663	1172	1344	1627	659	1222	1247	1560	652	1172	1341	1627	734	1222	1257	1560
S012	656	1179	1273	1602	691	1281	1279	1643	650	1179	1293	1602	679	1281	1303	1643
S012	624	1168	1226	1561	661	1260	1284	1577	618	1168	1214	1561	679	1260	1276	1577
S012	604	1183	1350	1639	639	1251	1342	1610	645	1183	1343	1639	645	1251	1306	1610
S012	672	1191	1281	1659	642	1278	1223	1620	640	1191	1246	1659	659	1278	1265	1620
S012	590	1219	1407	1715	692	1310	1337	1657	606	1219	1322	1715	719	1310	1325	1657
S012	775	1526	1791	2152	906	1749	1897	2221	837	1526	1825	2152	929	1749	1901	2221
S012	743	1337	1533	1855	868	1627	1652	2037	757	1337	1513	1855	852	1627	1647	2037
S012	720	1316	1591	1820	738	1407	1541	1797	694	1316	1465	1820	727	1407	1498	1797
S012	712	1349	1496	1845	766	1435	1506	1804	689	1349	1468	1845	777	1435	1468	1804
S012	693	1349	1615	1870	775	1493	1471	1898	635	1349	1583	1870	788	1493	1495	1898
S012	742	1418	1639	1907	771	1481	1518	1890	701	1418	1616	1907	786	1481	1485	1890
S012	786	1487	1770	2043	800	1528	1522	1947	762	1487	1734	2043	800	1528	1515	1947
S013	628	1127	1209	1617	816	1415	1425	1743	638	1127	1197	1617	868	1415	1437	1743
S013	631	1141	1269	1644	722	1251	1338	1623	627	1141	1288	1644	759	1251	1309	1623
S013	621	1108	1310	1605	726	1240	1299	1606	644	1108	1168	1605	769	1240	1357	1606
S013	572	1152	1282	1645	747	1302	1285	1660	572	1152	1187	1645	779	1302	1357	1660
S013	690	1156	1300	1676	757	1288	1324	1644	662	1156	1268	1676	744	1288	1322	1644
S013	613	1128	1237	1636	748	1275	1307	1646	630	1128	1153	1636	752	1275	1413	1646
S013	654	1159	1357	1688	743	1310	1346	1674	673	1159	1243	1688	777	1310	1364	1674
S013	644	1193	1418	1731	783	1337	1356	1709	647	1193	1244	1731	755	1337	1389	1709
S013	633	1246	1407	1833	773	1367	1403	1752	678	1246	1339	1833	827	1367	1350	1752
S013	731	1273	1459	1831	967	1660	1707	2089	745	1273	1435	1831	976	1660	1707	2089
S013	694	1250	1466	1813	747	1399	1437	1761	681	1250	1371	1813	783	1399	1409	1761
S013	688	1228	1396	1788	824	1405	1463	1810	667	1228	1366	1788	845	1405	1447	1810
S013	725	1327	1471	1876	801	1456	1541	1865	734	1327	1417	1876	826	1456	1477	1865
S013	743	1322	1477	1902	818	1462	1533	1888	794	1322	1437	1902	825	1462	1475	1888
S013	648	1278	1494	1868	793	1404	1464	1818	659	1278	1366	1868	816	1404	1402	1818
S013	737	1393	1596	2027	838	1504	1559	1974	727	1393	1570	2027	862	1504	1464	1974
S014	695	1139	1240	1530	745	1261	1390	1653	692	1139	1225	1530	804	1261	1401	1653
S014	656	1130	1237	1537	654	1113	1235	1516	668	1130	1246	1537	638	1113	1272	1516
S014	667	1160	1241	1566	665	1134	1289	1558	682	1160	1251	1566	664	1134	1289	1558
S014	678	1178	1252	1574	663	1156	1322	1583	695	1178	1228	1574	694	1156	1300	1583
S014	681	1158	1219	1576	664	1129	1230	1546	700	1158	1223	1576	709	1129	1213	1546
S014	697	1171	1249	1571	681	1148	1305	1581	685	1171	1244	1571	668	1148	1200	1581
S014	732	1196	1255	1597	684	1171	1308	1595	729	1196	1234	1597	712	1171	1318	1595
S014	669	1189	1271	1588	645	1172	1326	1591	683	1189	1234	1588	668	1172	1247	1591
S014	729	1231	1382	1698	674	1186	1312	1618	739	1231	1317	1698	674	1186	1335	1618
S014	680	1237	1461	1734	719	1255	1357	1692	693	1237	1391	1734	755	1255	1397	1692
S014	845	1445	1617	1957	944	1627	1759	2165	863	1445	1562	1957	962	1627	1709	2165
S014	795	1390	1623	1919	748	1388	1538	1900	818	1390	1420	1919	789	1388	1552	1900
S014	764	1380	1623	1898	768	1369	1464	1889	803	1380	1477	1898	801	1369	1483	1889
S014	773	1408	1488	1901	779	1400	1582	1897	784	1408	1612	1901	791	1400	1554	1897
S014	747	1373	1563	1878	776	1351	1454	1868	739	1373	1542	1878	822	1351	1545	1868
S014	739	1384	1504	1927	815	1370	1562	1901	756	1384	1575	1927	833	1370	1548	1901
S014	769	1428	1647	1988	783	1433	1636	1953	781	1428	1576	1988	788	1433	1631	1953
S015	497	1077	1223	1539	793	1392	1398	1726	493	1077	1133	1539	803	1392	1413	1726
S015	579	1148	1288	1576	656	1246	1285	1595	523	1148	1215	1576	668	1246	1287	1595
S015	616	1183	1333	1674	649	1254	1295	1604	579	1183	1219	1674	735	1254	1365	1604
S015	546	1155	1313	1631	683	1289	1352	1634	568	1155	1115	1631	711	1289	1238	1634
S015	577	1206	1423	1741	678	1317	1307	1656	599	1206	1250	1741	709	1317	1339	1656
S015	570	1164	1312	1672	715	1377	1336	1720	573	1164	1171	1672	757	1377	1346	1720
S015	615	1196	1390	1751	705	1350	1382	1709	687	1196	1317	1751	741	1350	1412	1709
S015	647	1203	1380	1766	738	1405	1367	1770	640	1203	1384	1766	798	1405	1356	1770
S015	631	1224	1413	1771	702	1390	1355	1771	671	1224	1353	1771	701	1390	1413	1771
S015	610	1207	1368	1780	721	1400	1318	1728	666	1207	1316	1780	789	1400	1398	1728
S015	610	1321	1571	1989	937	1746	1744	2154	610	1321	1480	1989	962	1746	1806	2154
S015	637	1282	1491	1880	779	1528	1552	1968	523	1282	1453	1880	779	1528	1511	1968
S015	639	1306	1519	1997	760	1462	1473	1898	580	1306	1518	1997	825	1462	1539	1898
S015	665	1341	1511	1985	791	1548	1591	2006	622	1341	1379	1985	812	1548	1612	2006
S015	642	1362	1569	2033	794	1550	1682	2011	634	1362	1477	2033	811	1550	1542	2011
S015	726	1431	1600	2029	800	1589	1700	2096	761	1431	1561	2029	865	1589	1665	2096
S015	720	1425	1714	2159	794	1543	1593	2006	694	1425	1641	2159	886	1543	1609	2006

## Sheet: Straight_ICC(1,1)_All
Skater No.	Straight_R_onset_1	Straight_R_TurnBack_1	Straight_R_PushOn_1	Straight_R_PushOff_1	Straight_R_OffSet_1	Straight_L_onset_1	Straight_L_TurnBack_1	Straight_L_PushOn_1	Straight_L_PushOff_1	Straight_L_OffSet_1	Straight_R_onset_2	Straight_R_TurnBack_2	Straight_R_PushOn_2	Straight_R_PushOff_2	Straight_R_OffSet_2	Straight_L_onset_2	Straight_L_TurnBack_2	Straight_L_PushOn_2	Straight_L_PushOff_2	Straight_L_OffSet_2
S001	787	1260	1582	1618	1981	765	1118	1405	1476	1890	788	1293	1582	1618	1981	777	1127	1405	1476	1890
S001	796	1314	1645	1672	2103	826	1253	1514	1620	2041	817	1347	1645	1672	2103	838	1247	1514	1620	2041
S001	792	1311	1638	1735	2114	842	1230	1557	1722	2085	796	1338	1638	1723	2114	855	1228	1557	1722	2085
S001	806	1356	1662	1740	2164	764	1311	1612	1719	2125	813	1379	1662	1704	2164	756	1286	1612	1719	2125
S001	886	1482	1821	1960	2403	880	1384	1685	1881	2249	888	1478	1821	1960	2403	882	1376	1685	1857	2249
S001	892	1238	1769	1940	2305	981	1595	1856	2016	2389	893	1242	1769	1832	2305	981	1547	1856	1980	2389
S001	871	1433	1769	1865	2249	808	1161	1521	1692	2067	859	1435	1769	1848	2249	798	1142	1521	1718	2067
S001	895	1457	1834	1912	2368	911	1400	1730	1921	2311	897	1439	1834	1921	2368	915	1396	1730	1947	2311
S001	901	1453	1812	1883	2357	929	1438	1768	1914	2362	722	1453	1812	1926	2357	943	1424	1768	1957	2362
S001	883	1558	1961	2105	2600	938	1362	1771	1960	2388	901	1572	1961	2114	2600	945	1341	1771	1968	2388
S002	845	1526	1750	1805	2223	706	1124	1505	1619	2021	848	1526	1750	1790	2223	722	1124	1505	1635	2021
S002	851	1563	1772	1919	2270	898	1254	1731	1812	2238	887	1548	1772	1904	2270	898	1301	1731	1796	2238
S002	918	1568	1828	1924	2354	889	1261	1767	1864	2302	916	1568	1828	1940	2354	874	1276	1767	1895	2302
S002	870	1520	1787	1907	2342	909	1234	1787	1946	2327	908	1505	1787	1938	2342	893	1249	1787	1884	2327
S002	912	1562	1847	2011	2411	934	1399	1830	1925	2380	937	1562	1847	2011	2411	919	1368	1830	1940	2380
S002	962	1565	1916	2092	2481	1046	1387	1869	1975	2420	958	1581	1916	2030	2481	969	1371	1869	2021	2420
S002	895	1545	1915	2071	2434	994	1427	1937	2047	2491	932	1561	1915	2025	2434	1010	1427	1937	2093	2491
S002	939	1769	2057	2191	2599	747	1240	1673	1926	2319	915	1793	2057	2167	2599	747	1228	1673	1878	2319
S002	940	1674	2005	2180	2588	980	1509	2009	2207	2573	940	1686	2005	2156	2588	980	1557	2009	2171	2573
S002	928	1710	2022	2192	2652	983	1524	2031	2174	2604	940	1710	2022	2180	2652	971	1548	2031	2174	2604
S002	852	1671	2005	2248	2675	979	1460	2036	2279	2642	900	1659	2005	2224	2675	979	1484	2036	2291	2642
S002	934	1752	2079	2258	2679	1057	1467	2116	2261	2719	958	1740	2079	2210	2679	1069	1479	2116	2249	2719
S003	889	1743	1862	2006	2353	709	1311	1719	1739	2228	974	1761	1862	2045	2353	745	1300	1719	1816	2228
S003	861	1670	1833	1885	2343	859	1449	1809	1922	2327	891	1704	1833	1923	2343	891	1445	1809	1858	2327
S003	880	1549	1732	1966	2366	853	1466	1790	1891	2255	896	1566	1732	1915	2366	872	1453	1790	1878	2255
S003	885	1671	1912	2115	2589	912	1539	1907	2035	2447	903	1690	1912	2090	2589	952	1532	1907	2100	2447
S003	961	1841	2084	2286	2770	986	1746	2123	2297	2713	984	1822	2084	2312	2770	1020	1755	2123	2271	2713
S003	837	1627	1981	2186	2573	1067	1857	2125	2202	2635	871	1645	1981	2225	2573	1080	1841	2125	2189	2635
S003	1003	1880	2125	2366	2718	873	1850	2072	2180	2665	1024	1891	2125	2386	2718	890	1860	2072	2170	2665
S003	1025	1938	2168	2392	2810	981	1779	2174	2249	2717	1030	1938	2168	2392	2810	1011	1775	2174	2280	2717
S003	991	1817	2093	2203	2752	1092	1811	2209	2184	2729	1017	1811	2093	2275	2752	1111	1792	2209	2174	2729
S003	1024	1895	2139	2371	2854	1039	1862	2261	2282	2837	1030	1897	2139	2371	2854	1075	1838	2261	2323	2837
S004	801	1406	1553	1668	2047	735	1277	1513	1560	1987	787	1406	1553	1682	2047	748	1264	1513	1560	1987
S004	859	1423	1562	1643	2066	799	1302	1572	1573	2054	831	1423	1562	1616	2066	799	1302	1572	1573	2054
S004	870	1476	1605	1778	2122	821	1286	1580	1569	2087	898	1489	1605	1682	2122	821	1298	1580	1621	2087
S004	867	1459	1662	1720	2152	850	1314	1641	1649	2156	853	1459	1662	1747	2152	850	1314	1641	1701	2156
S004	875	1480	1660	1783	2178	847	1350	1640	1750	2136	861	1494	1660	1769	2178	847	1350	1640	1763	2136
S004	884	1517	1725	1806	2256	891	1368	1685	1742	2208	884	1517	1725	1792	2256	865	1407	1685	1742	2208
S004	940	1504	1836	2054	2391	914	1534	1759	1933	2338	953	1504	1836	2081	2391	914	1546	1759	1882	2338
S004	985	1767	1880	1972	2412	826	1373	1735	1734	2338	889	1731	1880	1972	2412	826	1383	1735	1847	2338
S004	908	1462	1753	1919	2320	902	1563	1811	1924	2295	908	1486	1753	1907	2320	923	1573	1811	1841	2295
S004	936	1598	1828	1959	2400	939	1476	1833	1837	2364	899	1586	1828	1995	2400	939	1455	1833	1878	2364
S004	883	1521	1803	1918	2370	959	1485	1841	1939	2397	895	1521	1803	1846	2370	959	1474	1841	1918	2397
S004	920	1655	1918	2076	2570	904	1564	1820	1936	2430	933	1655	1918	2112	2570	904	1543	1820	1967	2430
S005	1014	1791	2110	2237	2620	851	1473	1808	2018	2527	1034	1832	2110	2218	2620	863	1427	1808	1977	2527
S005	998	1637	1996	2193	2527	966	1440	1868	2029	2554	1015	1689	1996	2129	2527	963	1486	1868	2036	2554
S005	1010	1593	1989	2221	2576	945	1490	1864	2057	2506	991	1611	1989	2175	2576	968	1505	1864	2014	2506
S005	1049	1704	2168	2431	2845	988	1561	1970	2161	2749	1071	1745	2168	2460	2845	994	1558	1970	2135	2749
S005	1045	1860	2184	2383	2760	932	1581	2105	2358	2832	1018	1844	2184	2394	2760	927	1546	2105	2344	2832
S005	961	1330	2031	2161	2580	1018	1954	2055	2180	2608	927	1395	2031	2207	2580	984	1947	2055	2181	2608
S005	1062	1888	2252	2379	2805	929	1718	2098	2300	2820	1050	1907	2252	2412	2805	928	1722	2098	2311	2820
S005	999	1730	2215	2407	2846	917	1611	2028	2214	2728	990	1733	2215	2424	2846	956	1585	2028	2194	2728
S005	1052	1808	2207	2472	2881	968	1716	2135	2348	2874	1054	1827	2207	2457	2881	952	1705	2135	2314	2874
S005	1082	1887	2250	2494	2862	919	1737	2129	2327	2849	1082	1887	2250	2444	2862	936	1720	2129	2339	2849
S006	929	1279	1716	1745	2219	751	1285	1502	1755	2128	940	1280	1716	1683	2219	765	1291	1502	1662	2128
S006	940	1495	1722	1754	2258	888	1306	1625	1794	2210	950	1476	1722	1662	2258	912	1299	1625	1717	2210
S006	817	1460	1714	1803	2265	887	1341	1657	1828	2248	951	1493	1714	1648	2265	915	1364	1657	1828	2248
S006	735	1469	1752	1937	2354	836	1361	1678	1886	2316	884	1472	1752	1704	2354	896	1406	1678	1701	2316
S006	1020	1598	1894	1981	2485	883	1488	1779	2000	2459	991	1579	1894	1935	2485	963	1474	1779	2016	2459
S006	712	1573	1920	1926	2522	912	1537	1802	2018	2508	766	1555	1920	1973	2522	919	1476	1802	2079	2508
S006	829	1472	1950	2159	2550	938	1489	1867	2141	2579	1045	1556	1950	2159	2550	949	1506	1867	2094	2579
S006	1036	1585	1892	1903	2435	839	1436	1731	1873	2366	1024	1614	1892	1855	2435	825	1451	1731	1873	2366
S006	807	1737	1952	2032	2566	911	1507	1811	1962	2493	816	1719	1952	2008	2566	951	1517	1811	1938	2493
S006	819	1527	1955	2078	2597	971	1491	1876	2046	2598	862	1561	1955	2030	2597	1010	1516	1876	2033	2598
S006	823	1700	1999	2094	2650	922	1527	1876	2024	2586	830	1756	1999	2069	2650	964	1542	1876	1987	2586
S006	799	1743	2084	2176	2753	971	1655	1957	2206	2709	828	1731	2084	2140	2753	954	1665	1957	2182	2709
S007	1016	1698	2008	2091	2558	749	1263	1630	1911	2291	1038	1698	2008	2166	2558	743	1232	1630	1771	2291
S007	936	1425	1963	2044	2535	931	1437	1907	2143	2519	985	1453	1963	2059	2535	923	1468	1907	2032	2519
S007	1016	1513	1997	2140	2602	972	1508	1947	2178	2547	1051	1513	1997	2001	2602	962	1576	1947	2077	2547
S007	1107	1664	2155	2307	2745	1004	1624	2025	2324	2727	1106	1636	2155	2214	2745	992	1593	2025	2243	2727
S007	1049	1568	2154	2262	2773	990	1560	2027	2290	2699	1059	1472	2154	2236	2773	1003	1591	2027	2192	2699
S007	1002	1328	1987	2068	2505	1033	1810	2095	2284	2670	1025	1355	1987	2078	2505	1017	1779	2095	2151	2670
S007	935	1170	1870	2074	2452	947	1692	1868	1951	2382	936	1204	1870	2009	2452	955	1735	1868	1946	2382
S007	1060	1745	2276	2391	2806	829	1402	1856	2135	2569	1072	1790	2276	2348	2806	828	1439	1856	2083	2569
S007	1108	1830	2378	2484	2926	994	1670	2164	2455	2881	1123	1797	2378	2432	2926	993	1711	2164	2335	2881
S007	1191	1778	2508	2644	3141	1053	1663	2170	2566	2994	1179	1778	2508	2608	3141	1031	1667	2170	2385	2994
S007	1234	1651	2506	2577	3073	1125	1914	2389	2760	3191	1246	1738	2506	2493	3073	1122	1939	2389	2637	3191
S008	861	1351	1674	1776	2190	768	779	1606	1659	2116	860	1356	1674	1718	2190	779	852	1606	1622	2116
S008	849	1493	1739	1849	2276	805	981	1671	1722	2207	852	1498	1739	1830	2276	831	947	1671	1727	2207
S008	903	1539	1751	1836	2268	867	1211	1760	1754	2297	913	1515	1751	1838	2268	903	1158	1760	1790	2297
S008	872	1497	1726	1795	2230	843	1261	1712	1804	2230	861	1507	1726	1728	2230	851	1217	1712	1766	2230
S008	855	1478	1720	1804	2217	834	1247	1722	1789	2219	838	1473	1720	1763	2217	837	1237	1722	1753	2219
S008	825	1357	1694	1826	2230	852	1331	1694	1749	2185	822	1357	1694	1791	2230	887	1331	1694	1701	2185
S008	953	1697	2015	2141	2554	846	1554	1885	1943	2410	966	1681	2015	2131	2554	869	1534	1885	1901	2410
S008	977	1827	2112	2280	2705	978	1544	2042	2133	2604	989	1831	2112	2253	2705	986	1539	2042	2163	2604
S008	1009	1753	2112	2247	2701	996	1673	2162	2294	2721	1018	1761	2112	2244	2701	1021	1694	2162	2247	2721
S008	1039	1835	2169	2343	2827	1054	1657	2135	2287	2754	1046	1839	2169	2339	2827	1083	1661	2135	2301	2754
S009	837	1278	1575	1705	2030	705	932	1392	1493	1867	837	1239	1575	1685	2030	715	937	1392	1521	1867
S009	828	1356	1616	1752	2064	836	1182	1566	1728	2057	828	1323	1616	1709	2064	836	1182	1566	1687	2057
S009	824	1258	1621	1724	2101	859	1220	1586	1696	2070	856	1236	1621	1720	2101	828	1205	1586	1674	2070
S009	851	1326	1653	1783	2150	823	1189	1640	1715	2116	858	1238	1653	1767	2150	838	1132	1640	1757	2116
S009	868	1213	1701	1862	2186	880	1169	1686	1792	2197	877	1186	1701	1863	2186	864	1153	1686	1809	2197
S009	883	1252	1718	1891	2244	882	1191	1675	1865	2177	877	1268	1718	1846	2244	866	1165	1675	1821	2177
S009	898	1216	1759	1931	2257	909	1218	1759	1894	2298	913	1243	1759	1937	2257	893	1208	1759	1889	2298
S009	912	1480	1785	1937	2331	763	1207	1627	1835	2196	933	1452	1785	1938	2331	770	1190	1627	1772	2196
S009	907	1413	1827	2023	2394	945	1358	1775	1995	2360	924	1399	1827	2008	2394	942	1355	1775	1977	2360
S009	867	1390	1858	2045	2447	922	1403	1823	1957	2383	929	1307	1858	1989	2447	925	1379	1823	1968	2383
S009	935	1562	1945	2134	2563	934	1391	1888	2050	2460	929	1569	1945	2119	2563	951	1374	1888	2059	2460
S010	860	1453	1707	1971	2365	864	1428	1693	1710	2240	865	1435	1707	1949	2365	858	1384	1693	1694	2240
S010	923	1597	1833	2067	2512	934	1517	1869	1978	2489	903	1578	1833	2074	2512	904	1535	1869	1987	2489
S010	954	1593	1904	2217	2608	880	1586	1890	2011	2544	968	1612	1904	2169	2608	898	1549	1890	2019	2544
S010	941	1531	1865	2116	2551	950	1538	1902	2083	2532	949	1574	1865	2120	2551	950	1495	1902	2089	2532
S010	970	1538	1884	2119	2610	976	1632	1940	2244	2579	981	1563	1884	2065	2610	982	1626	1940	2159	2579
S010	966	1548	1891	2140	2644	961	1686	1980	2265	2637	966	1573	1891	2112	2644	980	1643	1980	2268	2637
S010	933	1562	1816	2081	2413	1031	1750	1993	2120	2603	973	1562	1816	2094	2413	1012	1675	1993	2096	2603
S010	972	1785	2094	2351	2761	863	1347	1894	1983	2575	773	1781	2094	2326	2761	863	1363	1894	1991	2575
S010	994	1762	2139	2458	2923	1022	1708	2094	2359	2767	833	1754	2139	2468	2923	1035	1716	2094	2364	2767
S010	1028	1787	2140	2445	2943	1084	1819	2198	2501	2977	1056	1837	2140	2411	2943	1080	1802	2198	2599	2977
S010	971	1694	2068	2391	2909	1063	1770	2126	2496	2877	1000	1656	2068	2292	2909	1080	1757	2126	2480	2877
S011	804	1262	1702	1785	2147	758	1039	1399	1631	2020	832	1173	1702	1779	2147	747	995	1399	1650	2020
S011	865	1207	1767	1908	2236	852	1326	1550	1785	2163	882	1146	1767	1901	2236	825	1249	1550	1783	2163
S011	894	1305	1803	1928	2294	864	1398	1661	1933	2274	920	1366	1803	1944	2294	892	1382	1661	1932	2274
S011	879	1450	1793	1959	2281	930	1409	1683	1915	2294	900	1208	1793	1940	2281	914	1437	1683	1921	2294
S011	931	1372	1837	1935	2319	910	1428	1711	1988	2308	926	1135	1837	1983	2319	927	1439	1711	1951	2308
S011	915	1139	1801	1954	2313	964	1553	1709	1991	2277	930	1029	1801	1976	2313	975	1548	1709	1983	2277
S011	853	1067	1677	1843	2179	922	1501	1719	1901	2244	880	1067	1677	1849	2179	928	1517	1719	1902	2244
S011	1016	1782	1951	2105	2448	845	1433	1702	2001	2376	1006	1811	1951	2129	2448	835	1375	1702	1997	2376
S011	890	1694	1881	1968	2369	873	1365	1730	2021	2327	895	1656	1881	2061	2369	902	1393	1730	1952	2327
S011	804	1672	1883	2019	2428	979	1490	1783	2041	2388	833	1725	1883	2047	2428	979	1499	1783	2044	2388
S011	992	1633	1928	2010	2412	932	1482	1811	2061	2457	925	1725	1928	2009	2412	985	1510	1811	2113	2457
S011	936	1620	1932	2090	2496	937	1573	1772	2012	2371	936	1558	1932	2092	2496	923	1535	1772	2021	2371
S012	857	1380	1613	1834	2165	723	1149	1475	1645	1999	878	1368	1613	1847	2165	722	1168	1475	1614	1999
S012	825	1402	1634	1911	2230	843	1283	1612	1847	2140	849	1406	1634	1912	2230	821	1272	1612	1817	2140
S012	823	1456	1695	1841	2217	890	1303	1721	1922	2260	855	1493	1695	1862	2217	889	1318	1721	1907	2260
S012	876	1482	1695	1936	2241	928	1299	1702	1849	2270	890	1506	1695	1886	2241	930	1348	1702	1783	2270
S012	864	1524	1748	1965	2285	859	1203	1654	1877	2259	868	1517	1748	1947	2285	862	1275	1654	1886	2259
S012	876	1399	1695	1936	2252	884	1351	1691	1902	2232	923	1424	1695	1908	2252	883	1362	1691	1896	2232
S012	853	1280	1640	1830	2188	922	1376	1708	1885	2176	873	1258	1640	1814	2188	919	1376	1708	1894	2176
S012	911	1597	1857	2150	2420	796	1265	1643	1831	2259	951	1577	1857	2126	2420	821	1260	1643	1867	2259
S012	958	1693	1952	2198	2535	968	1486	1864	2064	2513	983	1672	1952	2183	2535	981	1467	1864	2055	2513
S012	963	1674	1967	2203	2561	983	1441	1834	2067	2472	982	1676	1967	2206	2561	973	1435	1834	2057	2472
S012	1003	1713	2006	2242	2634	1015	1593	1967	2243	2630	1018	1726	2006	2208	2634	1021	1613	1967	2220	2630
S012	969	1739	1987	2341	2634	1009	1611	1926	2177	2550	980	1751	1987	2300	2634	1026	1623	1926	2129	2550
S013	849	1372	1755	1949	2387	789	1214	1553	1704	2190	867	1335	1755	1924	2387	801	1219	1553	1786	2190
S013	938	1406	1849	1970	2467	920	1488	1831	1991	2434	936	1393	1849	1982	2467	928	1480	1831	2038	2434
S013	948	1429	1899	2089	2556	975	1453	1852	2007	2467	963	1458	1899	2108	2556	1013	1472	1852	2051	2467
S013	895	1446	1918	2079	2569	1036	1514	1939	2210	2600	945	1479	1918	2101	2569	1070	1514	1939	2226	2600
S013	995	1532	2005	2206	2705	1003	1467	1950	2267	2654	986	1531	2005	2214	2705	1030	1536	1950	2187	2654
S013	987	1455	1898	2032	2481	1019	1548	1966	2244	2646	1072	1458	1898	2096	2481	1030	1592	1966	2170	2646
S013	1028	1554	1985	2152	2636	839	1385	1753	2025	2402	1040	1527	1985	2134	2636	840	1385	1753	1852	2402
S013	1012	1549	1943	2106	2615	975	1553	1955	2296	2614	1017	1542	1943	2170	2615	1023	1585	1955	2196	2614
S013	967	1658	2079	2267	2737	982	1559	1951	2251	2642	1058	1652	2079	2276	2737	1002	1572	1951	2237	2642
S013	995	1728	2122	2264	2787	1084	1683	2095	2333	2766	1087	1711	2122	2343	2787	1131	1672	2095	2316	2766
S014	953	1462	1707	1765	2225	769	1113	1526	1663	2051	966	1456	1707	1831	2225	768	1120	1526	1599	2051
S014	971	1480	1722	1961	2293	892	1359	1727	1910	2238	960	1461	1722	1979	2293	875	1354	1727	1877	2238
S014	934	1471	1730	1870	2267	924	1268	1739	1928	2279	930	1437	1730	1871	2267	933	1302	1739	1891	2279
S014	937	1515	1772	1969	2311	901	1382	1760	1974	2295	948	1487	1772	1961	2311	917	1407	1760	1897	2295
S014	992	1543	1811	2052	2374	931	1385	1773	1963	2331	988	1511	1811	2045	2374	940	1353	1773	1926	2331
S014	930	1425	1759	1989	2359	966	1393	1796	1957	2319	915	1411	1759	2039	2359	977	1406	1796	1896	2319
S014	827	937	1635	1872	2184	945	1605	1792	1867	2255	825	918	1635	1898	2184	981	1620	1792	1862	2255
S014	1054	1724	2016	2137	2525	820	1367	1747	2038	2380	1070	1714	2016	2176	2525	813	1358	1747	1957	2380
S014	1057	1707	2000	2192	2631	989	1597	1912	2124	2512	1084	1704	2000	2203	2631	989	1621	1912	2079	2512
S014	1036	1696	2017	2264	2584	1087	1541	2024	2243	2632	1046	1678	2017	2223	2584	1083	1591	2024	2219	2632
S014	1073	1692	2009	2321	2686	1035	1592	1975	2180	2563	1068	1704	2009	2286	2686	1028	1622	1975	2143	2563
S015	908	1527	1708	1876	2298	740	1282	1540	1862	2206	900	1519	1708	1901	2298	736	1278	1540	1738	2206
S015	932	1512	1737	2002	2389	804	1359	1644	1965	2325	935	1544	1737	1983	2389	822	1344	1644	1932	2325
S015	903	1600	1805	2116	2496	813	1394	1720	1987	2387	900	1586	1805	2113	2496	825	1434	1720	2007	2387
S015	922	1644	1846	2122	2573	903	1496	1841	2115	2520	928	1640	1846	2141	2573	916	1535	1841	2041	2520
S015	1019	1741	1901	2231	2632	962	1556	1882	2252	2600	925	1689	1901	2241	2632	951	1565	1882	2221	2600
S015	954	1663	1847	2102	2476	1019	1484	1900	2128	2552	905	1653	1847	2087	2476	989	1541	1900	2150	2552
S015	1026	1831	2017	2275	2674	831	1491	1807	2162	2582	1013	1802	2017	2265	2674	839	1582	1807	2148	2582
S015	932	1706	1901	2201	2609	1004	1602	1885	2160	2556	933	1668	1901	2163	2609	1003	1606	1885	2171	2556
S015	933	1717	1948	2264	2724	986	1595	1939	2162	2641	958	1722	1948	2238	2724	990	1635	1939	2221	2641
S015	975	1852	2089	2429	2905	1028	1688	2042	2380	2882	968	1835	2089	2413	2905	1005	1669	2042	2433	2882
S001	782	1258	1582	1660	1981	763	1083	1405	1522	1890	794	1268	1582	1606	1981	784	1113	1405	1483	1890
S001	801	1310	1645	1774	2103	830	1244	1514	1696	2041	813	1303	1645	1745	2103	846	1248	1514	1617	2041
S001	793	1301	1638	1766	2114	853	1242	1557	1737	2085	815	1313	1638	1730	2114	853	1223	1557	1777	2085
S001	806	1358	1662	1772	2164	888	1327	1612	1722	2125	821	1335	1662	1769	2164	881	1314	1612	1716	2125
S001	887	1433	1821	1960	2403	883	1391	1685	1880	2249	906	1444	1821	1991	2403	900	1382	1685	1784	2249
S001	893	1207	1769	1865	2305	980	1588	1856	1983	2389	921	1210	1769	1837	2305	1021	1591	1856	1984	2389
S001	862	1413	1769	1888	2249	808	1135	1521	1709	2067	899	1409	1769	1840	2249	831	1193	1521	1692	2067
S001	893	1427	1834	1960	2368	910	1380	1730	1918	2311	922	1426	1834	1960	2368	927	1386	1730	1920	2311
S001	891	1447	1812	1944	2357	928	1412	1768	1900	2362	883	1422	1812	1933	2357	946	1416	1768	1973	2362
S001	877	1554	1961	2154	2600	954	1331	1771	1998	2388	895	1544	1961	2152	2600	965	1343	1771	1911	2388
S002	846	1515	1750	1838	2223	692	1103	1505	1619	2021	916	1536	1750	1814	2223	678	1164	1505	1618	2021
S002	849	1542	1772	1897	2270	880	1291	1731	1791	2238	872	1512	1772	1863	2270	898	1322	1731	1828	2238
S002	901	1595	1828	1950	2354	844	1215	1767	1892	2302	926	1576	1828	1917	2354	870	1273	1767	1862	2302
S002	838	1491	1787	1918	2342	881	1235	1787	1953	2327	885	1504	1787	1855	2342	902	1305	1787	1904	2327
S002	883	1536	1847	1939	2411	924	1360	1830	1965	2380	918	1548	1847	1930	2411	930	1312	1830	1952	2380
S002	883	1569	1916	2061	2481	915	1375	1869	2004	2420	913	1605	1916	2049	2481	956	1348	1869	1999	2420
S002	886	1571	1915	1967	2434	987	1463	1937	2052	2491	921	1603	1915	1954	2434	984	1500	1937	2089	2491
S002	922	1788	2057	2177	2599	722	1211	1673	1882	2319	946	1789	2057	2126	2599	745	1211	1673	1870	2319
S002	907	1698	2005	2162	2588	968	1526	2009	2185	2573	917	1648	2005	2138	2588	1013	1519	2009	2153	2573
S002	935	1707	2022	2158	2652	973	1519	2031	2146	2604	955	1718	2022	2120	2652	962	1516	2031	2183	2604
S002	892	1676	2005	2184	2675	978	1449	2036	2239	2642	890	1677	2005	2263	2675	1000	1482	2036	2245	2642
S002	927	1749	2079	2175	2679	1046	1454	2116	2213	2719	986	1781	2079	2215	2679	1049	1411	2116	2254	2719
S003	888	1708	1862	2017	2353	714	1312	1719	1782	2228	943	1709	1862	2019	2353	714	1282	1719	1764	2228
S003	867	1653	1833	1908	2343	872	1436	1809	1880	2327	879	1654	1833	1852	2343	913	1463	1809	1894	2327
S003	889	1575	1732	1918	2366	877	1461	1790	1858	2255	903	1574	1732	1935	2366	892	1460	1790	1813	2255
S003	882	1669	1912	2139	2589	913	1565	1907	1982	2447	920	1652	1912	2108	2589	961	1554	1907	2079	2447
S003	961	1815	2084	2312	2770	1013	1732	2123	2263	2713	973	1817	2084	2342	2770	1044	1758	2123	2292	2713
S003	832	1612	1981	2176	2573	1069	1869	2125	2198	2635	854	1611	1981	2205	2573	1085	1885	2125	2221	2635
S003	997	1874	2125	2272	2718	879	1873	2072	2185	2665	1044	1877	2125	2332	2718	906	1877	2072	2173	2665
S003	1021	1946	2168	2387	2810	972	1773	2174	2251	2717	1039	1934	2168	2409	2810	995	1780	2174	2276	2717
S003	996	1819	2093	2244	2752	1088	1798	2209	2201	2729	1017	1788	2093	2291	2752	1135	1810	2209	2271	2729
S003	1024	1879	2139	2422	2854	1042	1838	2261	2381	2837	1046	1880	2139	2368	2854	1078	1814	2261	2358	2837
S004	807	1395	1553	1667	2047	734	1265	1513	1567	1987	831	1401	1553	1648	2047	746	1289	1513	1573	1987
S004	832	1391	1562	1670	2066	776	1294	1572	1616	2054	850	1401	1562	1658	2066	808	1281	1572	1668	2054
S004	816	1461	1605	1762	2122	786	1283	1580	1632	2087	904	1483	1605	1731	2122	802	1284	1580	1654	2087
S004	844	1446	1662	1783	2152	836	1313	1641	1709	2156	875	1463	1662	1720	2152	849	1297	1641	1692	2156
S004	864	1474	1660	1746	2178	824	1348	1640	1690	2136	890	1468	1660	1734	2178	836	1361	1640	1757	2136
S004	866	1525	1725	1805	2256	825	1362	1685	1725	2208	887	1548	1725	1824	2256	860	1402	1685	1746	2208
S004	868	1470	1836	1986	2391	888	1533	1759	1869	2338	908	1486	1836	1963	2391	907	1595	1759	1827	2338
S004	1026	1735	1880	1992	2412	802	1372	1735	1845	2338	1040	1739	1880	1964	2412	832	1382	1735	1844	2338
S004	872	1474	1753	1913	2320	894	1582	1811	1861	2295	909	1463	1753	1889	2320	924	1599	1811	1846	2295
S004	898	1588	1828	1977	2400	927	1470	1833	1911	2364	910	1585	1828	1962	2400	928	1458	1833	1906	2364
S004	869	1540	1803	1941	2370	950	1487	1841	1918	2397	928	1522	1803	1956	2370	967	1504	1841	1931	2397
S004	901	1666	1918	2112	2570	891	1569	1820	1961	2430	911	1658	1918	2084	2570	911	1579	1820	1971	2430
S005	1015	1776	2110	2162	2620	820	1435	1808	2013	2527	1033	1804	2110	2226	2620	838	1453	1808	2031	2527
S005	983	1672	1996	2094	2527	918	1506	1868	2111	2554	1020	1626	1996	2112	2527	955	1469	1868	2111	2554
S005	990	1568	1989	2174	2576	879	1531	1864	1999	2506	1026	1577	1989	2137	2576	879	1531	1864	2082	2506
S005	1057	1700	2168	2343	2845	989	1540	1970	2183	2749	1085	1672	2168	2343	2845	999	1559	1970	2302	2749
S005	1021	1820	2184	2307	2760	939	1591	2105	2307	2832	1076	1793	2184	2307	2760	921	1554	2105	2362	2832
S005	923	1428	2031	2117	2580	990	1926	2055	2137	2608	988	1346	2031	2144	2580	990	1953	2055	2192	2608
S005	1039	1886	2252	2354	2805	913	1712	2098	2249	2820	1087	1879	2252	2402	2805	934	1726	2098	2359	2820
S005	1078	1759	2215	2331	2846	943	1591	2028	2169	2728	1009	1759	2215	2399	2846	930	1570	2028	2293	2728
S005	1061	1853	2207	2411	2881	983	1720	2135	2367	2874	1061	1832	2207	2369	2881	976	1678	2135	2443	2874
S005	1065	1884	2250	2428	2862	918	1703	2129	2281	2849	1065	1850	2250	2469	2862	897	1724	2129	2398	2849
S006	918	1233	1716	1725	2219	745	1310	1502	1705	2128	933	1243	1716	1769	2219	773	1320	1502	1702	2128
S006	933	1425	1722	1756	2258	867	1335	1625	1674	2210	955	1461	1722	1760	2258	917	1309	1625	1609	2210
S006	957	1441	1714	1756	2265	891	1359	1657	1778	2248	959	1444	1714	1847	2265	938	1340	1657	1681	2248
S006	918	1426	1752	1829	2354	885	1369	1678	1861	2316	904	1441	1752	1916	2354	910	1406	1678	1798	2316
S006	1024	1572	1894	1992	2485	916	1488	1779	2029	2459	1018	1586	1894	2071	2485	969	1444	1779	1961	2459
S006	740	1490	1920	1982	2522	924	1505	1802	1892	2508	960	1497	1920	2054	2522	916	1526	1802	1835	2508
S006	1089	1485	1950	2097	2550	949	1513	1867	1949	2579	1081	1505	1950	2124	2550	969	1517	1867	2023	2579
S006	1021	1579	1892	1887	2435	823	1457	1731	1858	2366	1047	1577	1892	1923	2435	844	1463	1731	1840	2366
S006	1045	1672	1952	2011	2566	979	1493	1811	1982	2493	805	1689	1952	2002	2566	960	1490	1811	1956	2493
S006	1032	1421	1955	2079	2597	1007	1509	1876	2011	2598	1050	1428	1955	2102	2597	997	1495	1876	2049	2598
S006	1069	1684	1999	2104	2650	931	1552	1876	2022	2586	1040	1730	1999	2116	2650	945	1564	1876	2014	2586
S006	1035	1706	2084	2132	2753	985	1650	1957	2121	2709	1048	1723	2084	2277	2753	994	1636	1957	2126	2709
S007	1010	1646	2008	2130	2558	694	1234	1630	1815	2291	1052	1672	2008	2119	2558	753	1228	1630	1858	2291
S007	961	1445	1963	2000	2535	919	1484	1907	2080	2519	1030	1431	1963	2051	2535	931	1457	1907	2087	2519
S007	1007	1428	1997	2073	2602	948	1521	1947	2142	2547	1031	1501	1997	2121	2602	993	1572	1947	2098	2547
S007	1138	1675	2155	2285	2745	982	1595	2025	2289	2727	1137	1653	2155	2215	2745	976	1555	2025	2309	2727
S007	1081	1368	2154	2237	2773	965	1562	2027	2239	2699	1100	1432	2154	2259	2773	996	1595	2027	2236	2699
S007	1041	1372	1987	2080	2505	1008	1774	2095	2258	2670	1046	1367	1987	2079	2505	1003	1747	2095	2211	2670
S007	955	991	1870	1923	2452	951	1668	1868	1926	2382	962	1203	1870	1926	2452	936	1710	1868	1855	2382
S007	1057	1782	2276	2293	2806	821	1424	1856	2117	2569	1076	1772	2276	2316	2806	841	1419	1856	2128	2569
S007	1111	1799	2378	2407	2926	978	1672	2164	2317	2881	1128	1844	2378	2470	2926	998	1700	2164	2409	2881
S007	1169	1776	2508	2599	3141	1038	1667	2170	2414	2994	1189	1775	2508	2580	3141	1057	1683	2170	2427	2994
S007	1232	1737	2506	2506	3073	1109	1942	2389	2641	3191	1243	1684	2506	2489	3073	1126	1911	2389	2675	3191
S008	845	1347	1674	1754	2190	788	826	1606	1629	2116	856	1362	1674	1819	2190	783	871	1606	1666	2116
S008	844	1484	1739	1866	2276	818	968	1671	1746	2207	874	1517	1739	1878	2276	844	988	1671	1775	2207
S008	882	1503	1751	1848	2268	881	1182	1760	1778	2297	944	1490	1751	1883	2268	894	1151	1760	1857	2297
S008	835	1512	1726	1776	2230	830	1237	1712	1789	2230	877	1503	1726	1736	2230	862	1231	1712	1809	2230
S008	825	1484	1720	1747	2217	839	1253	1722	1736	2219	871	1458	1720	1723	2217	857	1242	1722	1756	2219
S008	816	1374	1694	1813	2230	859	1336	1694	1687	2185	807	1353	1694	1819	2230	887	1320	1694	1754	2185
S008	975	1684	2015	2136	2554	841	1567	1885	1927	2410	991	1694	2015	2127	2554	879	1574	1885	1987	2410
S008	980	1851	2112	2275	2705	985	1571	2042	2033	2604	964	1832	2112	2238	2705	982	1560	2042	2138	2604
S008	1000	1748	2112	2259	2701	1010	1698	2162	2247	2721	1020	1784	2112	2245	2701	1035	1689	2162	2261	2721
S008	1025	1837	2169	2386	2827	1052	1671	2135	2273	2754	1059	1851	2169	2346	2827	1082	1653	2135	2280	2754
S009	810	1226	1575	1692	2030	725	933	1392	1545	1867	813	1263	1575	1686	2030	752	933	1392	1501	1867
S009	845	1297	1616	1705	2064	827	1230	1566	1674	2057	840	1308	1616	1748	2064	856	1165	1566	1664	2057
S009	838	1204	1621	1749	2101	820	1189	1586	1687	2070	823	1199	1621	1759	2101	864	1174	1586	1664	2070
S009	852	1210	1653	1770	2150	833	1176	1640	1714	2116	861	1164	1653	1788	2150	859	1152	1640	1711	2116
S009	888	1146	1701	1842	2186	807	1190	1686	1809	2197	877	1189	1701	1822	2186	886	1144	1686	1773	2197
S009	882	1262	1718	1885	2244	862	1184	1675	1863	2177	885	1225	1718	1830	2244	875	1185	1675	1822	2177
S009	910	1218	1759	1921	2257	889	1225	1759	1904	2298	936	1211	1759	1909	2257	910	1220	1759	1899	2298
S009	912	1440	1785	1897	2331	755	1203	1627	1808	2196	931	1447	1785	1889	2331	768	1221	1627	1807	2196
S009	928	1426	1827	1981	2394	915	1359	1775	1977	2360	952	1399	1827	2036	2394	942	1337	1775	1905	2360
S009	918	1330	1858	1993	2447	908	1378	1823	1938	2383	922	1352	1858	2000	2447	922	1364	1823	1909	2383
S009	921	1558	1945	2140	2563	944	1352	1888	2028	2460	936	1579	1945	2089	2563	955	1339	1888	2062	2460
S010	889	1422	1707	2002	2365	833	1341	1693	1721	2240	865	1454	1707	1939	2365	852	1348	1693	1781	2240
S010	903	1532	1833	2040	2512	908	1513	1869	2021	2489	916	1557	1833	2083	2512	925	1545	1869	2041	2489
S010	956	1609	1904	2149	2608	903	1524	1890	2185	2544	986	1575	1904	2133	2608	894	1524	1890	2133	2544
S010	928	1549	1865	2106	2551	931	1520	1902	2117	2532	929	1590	1865	2117	2551	973	1541	1902	2130	2532
S010	966	1547	1884	2152	2610	972	1682	1940	2166	2579	1022	1548	1884	2189	2610	992	1632	1940	2200	2579
S010	961	1558	1891	2179	2644	941	1619	1980	2240	2637	1004	1572	1891	2181	2644	984	1604	1980	2224	2637
S010	946	1519	1816	2011	2413	998	1683	1993	2143	2603	973	1551	1816	1933	2413	1043	1662	1993	2303	2603
S010	973	1779	2094	2312	2761	833	1327	1894	2085	2575	778	1817	2094	2375	2761	857	1318	1894	2131	2575
S010	1013	1798	2139	2443	2923	1021	1709	2094	2344	2767	853	1783	2139	2492	2923	1043	1738	2094	2316	2767
S010	1042	1800	2140	2391	2943	1088	1733	2198	2475	2977	1070	1848	2140	2447	2943	1098	1814	2198	2517	2977
S010	1002	1663	2068	2367	2909	1068	1788	2126	2449	2877	1032	1693	2068	2437	2909	1075	1798	2126	2376	2877
S011	816	1174	1702	1812	2147	736	829	1399	1639	2020	797	1137	1702	1835	2147	740	896	1399	1685	2020
S011	891	1042	1767	1859	2236	838	1311	1550	1805	2163	844	1028	1767	1845	2236	822	1290	1550	1869	2163
S011	877	1264	1803	1881	2294	875	1377	1661	1943	2274	848	1362	1803	1886	2294	871	1367	1661	1945	2274
S011	899	1021	1793	1895	2281	931	1376	1683	1942	2294	886	1060	1793	1923	2281	938	1406	1683	1966	2294
S011	933	1098	1837	1894	2319	895	1404	1711	1985	2308	891	1083	1837	1983	2319	930	1453	1711	1967	2308
S011	922	1087	1801	1933	2313	910	1533	1709	1942	2277	903	995	1801	1922	2313	908	1541	1709	1972	2277
S011	860	1018	1677	1814	2179	898	1536	1719	1923	2244	858	1050	1677	1821	2179	916	1495	1719	1871	2244
S011	992	1852	1951	2052	2448	837	1389	1702	1985	2376	1008	1835	1951	2076	2448	841	1387	1702	1957	2376
S011	890	1662	1881	2001	2369	870	1397	1730	1992	2327	922	1709	1881	2022	2369	906	1412	1730	1967	2327
S011	867	1658	1883	1965	2428	958	1441	1783	2068	2388	834	1677	1883	2022	2428	965	1479	1783	2033	2388
S011	961	1695	1928	2014	2412	947	1493	1811	2076	2457	928	1723	1928	2100	2412	946	1460	1811	2039	2457
S011	920	1522	1932	2049	2496	917	1526	1772	2053	2371	941	1552	1932	2082	2496	931	1509	1772	2064	2371
S012	860	1362	1613	1850	2165	712	1200	1475	1615	1999	878	1365	1613	1870	2165	735	1185	1475	1589	1999
S012	846	1369	1634	1885	2230	814	1287	1612	1824	2140	880	1421	1634	1899	2230	838	1251	1612	1756	2140
S012	853	1498	1695	1849	2217	874	1347	1721	1935	2260	844	1477	1695	1808	2217	910	1351	1721	1874	2260
S012	901	1481	1695	1904	2241	901	1338	1702	1862	2270	894	1500	1695	1931	2241	945	1313	1702	1918	2270
S012	889	1513	1748	2007	2285	839	1255	1654	1957	2259	875	1499	1748	1903	2285	869	1255	1654	1980	2259
S012	898	1443	1695	1880	2252	867	1361	1691	1849	2232	921	1417	1695	1830	2252	887	1373	1691	1906	2232
S012	875	1241	1640	1822	2188	900	1359	1708	1889	2176	872	1249	1640	1809	2188	913	1381	1708	1794	2176
S012	923	1582	1857	2096	2420	808	1273	1643	1875	2259	941	1592	1857	2106	2420	842	1260	1643	1911	2259
S012	956	1702	1952	2160	2535	945	1485	1864	2150	2513	987	1662	1952	2192	2535	961	1483	1864	2094	2513
S012	974	1664	1967	2222	2561	954	1468	1834	2102	2472	998	1705	1967	2227	2561	978	1444	1834	2111	2472
S012	1003	1706	2006	2302	2634	1016	1618	1967	2239	2630	1016	1731	2006	2221	2634	1028	1607	1967	2249	2630
S012	941	1731	1987	2252	2634	1014	1641	1926	2231	2550	960	1779	1987	2285	2634	1041	1603	1926	2173	2550
S013	865	1338	1755	2005	2387	783	1187	1553	1805	2190	866	1380	1755	2086	2387	804	1200	1553	1691	2190
S013	922	1395	1849	2041	2467	925	1470	1831	2007	2434	930	1388	1849	2086	2467	946	1411	1831	1988	2434
S013	936	1473	1899	2111	2556	971	1435	1852	2093	2467	969	1483	1899	2162	2556	1025	1464	1852	2084	2467
S013	903	1462	1918	2150	2569	1018	1495	1939	2160	2600	937	1460	1918	2158	2569	1071	1502	1939	2224	2600
S013	936	1495	2005	2241	2705	998	1522	1950	2275	2654	1021	1507	2005	2278	2705	1019	1526	1950	2232	2654
S013	969	1485	1898	2159	2481	985	1563	1966	2195	2646	978	1446	1898	2052	2481	998	1583	1966	2211	2646
S013	1020	1520	1985	2219	2636	828	1349	1753	1995	2402	1044	1540	1985	2221	2636	858	1402	1753	1953	2402
S013	1013	1540	1943	2239	2615	990	1560	1955	2184	2614	997	1568	1943	2215	2615	1031	1603	1955	2188	2614
S013	978	1645	2079	2306	2737	995	1516	1951	2177	2642	1032	1673	2079	2292	2737	985	1550	1951	2183	2642
S013	989	1698	2122	2387	2787	1100	1665	2095	2320	2766	1008	1724	2122	2371	2787	1097	1689	2095	2316	2766
S014	951	1460	1707	1890	2225	753	1083	1526	1685	2051	961	1457	1707	1861	2225	754	1167	1526	1672	2051
S014	956	1450	1722	1981	2293	860	1355	1727	1892	2238	976	1508	1722	1949	2293	860	1328	1727	1915	2238
S014	906	1466	1730	1889	2267	930	1303	1739	1912	2279	941	1455	1730	1877	2267	944	1302	1739	1899	2279
S014	940	1500	1772	2001	2311	895	1354	1760	1884	2295	923	1492	1772	1942	2311	923	1355	1760	1832	2295
S014	974	1475	1811	2035	2374	923	1389	1773	1933	2331	980	1531	1811	2018	2374	978	1346	1773	1924	2331
S014	922	1388	1759	2026	2359	936	1423	1796	1896	2319	920	1434	1759	2021	2359	988	1410	1796	1906	2319
S014	843	957	1635	1803	2184	954	1577	1792	1864	2255	819	984	1635	1801	2184	964	1570	1792	1790	2255
S014	1048	1737	2016	2172	2525	806	1333	1747	1940	2380	1063	1738	2016	2151	2525	819	1397	1747	1948	2380
S014	1072	1695	2000	2212	2631	980	1576	1912	2130	2512	1092	1774	2000	2187	2631	993	1627	1912	2088	2512
S014	1021	1688	2017	2199	2584	1086	1554	2024	2253	2632	1043	1697	2017	2213	2584	1118	1490	2024	2096	2632
S014	1056	1712	2009	2341	2686	1002	1631	1975	2169	2563	1089	1695	2009	2266	2686	1026	1605	1975	2218	2563
S015	896	1508	1708	1951	2298	733	1257	1540	1828	2206	993	1484	1708	1845	2298	747	1263	1540	1754	2206
S015	917	1522	1737	2005	2389	812	1295	1644	1954	2325	915	1526	1737	1922	2389	804	1355	1644	1837	2325
S015	893	1612	1805	2076	2496	805	1410	1720	1995	2387	927	1642	1805	2089	2496	820	1440	1720	2016	2387
S015	911	1616	1846	2134	2573	925	1496	1841	2101	2520	936	1624	1846	2140	2573	937	1523	1841	2082	2520
S015	952	1678	1901	2195	2632	952	1516	1882	2269	2600	1073	1659	1901	2123	2632	956	1559	1882	2230	2600
S015	907	1667	1847	2077	2476	980	1504	1900	2109	2552	886	1669	1847	2073	2476	990	1514	1900	2100	2552
S015	1025	1804	2017	2299	2674	829	1528	1807	2178	2582	1167	1848	2017	2144	2674	868	1522	1807	2155	2582
S015	953	1684	1901	2249	2609	1000	1596	1885	2182	2556	999	1715	1901	2135	2609	1012	1659	1885	2148	2556
S015	930	1731	1948	2333	2724	992	1616	1939	2191	2641	923	1708	1948	2218	2724	1072	1596	1939	2208	2641
S015	964	1846	2089	2410	2905	1007	1657	2042	2421	2882	967	1834	2089	2351	2905	1061	1681	2042	2521	2882

## Sheet: Curve_ICC(1,1)_All
Skater No.	Curve_R_onset_1	Curve_R_PushOn_1	Curve_R_PushOff_1	Curve_R_OffSet_1	Curve_L_onset_1	Curve_L_PushOn_1	Curve_L_PushOff_1	Curve_L_OffSet_1	Curve_R_onset_2	Curve_R_PushOn_2	Curve_R_PushOff_2	Curve_R_OffSet_2	Curve_L_onset_2	Curve_L_PushOn_2	Curve_L_PushOff_2	Curve_L_OffSet_2
S001	532	1125	1065	1461	799	1307	1377	1572	549	1125	1104	1461	797	1307	1351	1572
S001	553	1058	1126	1410	728	1153	1172	1421	558	1058	984	1410	721	1153	1095	1421
S001	545	1060	1096	1389	687	1128	1196	1418	567	1060	993	1389	693	1128	1157	1418
S001	574	1109	1074	1460	697	1096	1119	1419	597	1109	1023	1460	706	1096	1145	1419
S001	585	1128	1059	1464	700	1149	1209	1514	582	1128	1059	1464	693	1149	1235	1514
S001	629	1217	1207	1588	679	1164	1178	1474	652	1217	1168	1588	688	1164	1153	1474
S001	553	1146	1115	1524	615	1195	1278	1560	573	1146	1089	1524	723	1195	1265	1560
S001	560	1152	1074	1519	699	1167	1266	1506	584	1152	1036	1519	711	1167	1214	1506
S001	568	1129	1077	1495	743	1158	1204	1478	574	1129	1039	1495	779	1158	1088	1478
S001	589	1205	1182	1599	759	1204	1248	1538	614	1205	1117	1599	771	1204	1016	1538
S001	674	1338	1374	1817	972	1704	1755	2061	688	1338	1362	1817	985	1704	1767	2061
S001	653	1307	1291	1769	802	1412	1440	1759	677	1307	1303	1769	790	1412	1488	1759
S001	712	1305	1351	1768	796	1421	1475	1815	725	1305	1363	1768	812	1421	1499	1815
S001	673	1296	1257	1752	763	1362	1429	1739	703	1296	1305	1752	815	1362	1381	1739
S001	703	1303	1286	1737	802	1370	1484	1777	708	1303	1322	1737	798	1370	1424	1777
S001	716	1362	1331	1783	761	1376	1428	1729	705	1362	1307	1783	766	1376	1440	1729
S001	714	1355	1402	1837	811	1382	1457	1802	740	1355	1354	1837	843	1382	1445	1802
S002	596	1239	1246	1672	831	1533	1590	1900	612	1239	1277	1672	831	1533	1590	1900
S002	658	1154	1076	1572	649	1269	1315	1605	673	1154	1107	1572	649	1269	1315	1605
S002	649	1198	1160	1616	639	1261	1304	1603	665	1198	1175	1616	654	1261	1242	1603
S002	674	1193	1169	1609	645	1265	1342	1613	658	1193	1169	1609	661	1265	1295	1613
S002	659	1223	1216	1643	642	1270	1307	1623	612	1223	1201	1643	626	1270	1292	1623
S002	703	1306	1291	1748	644	1340	1433	1720	687	1306	1260	1748	628	1340	1433	1720
S002	657	1239	1199	1667	673	1326	1385	1679	642	1239	1184	1667	688	1326	1338	1679
S002	724	1278	1281	1718	712	1339	1377	1712	708	1278	1235	1718	696	1339	1439	1712
S002	693	1260	1281	1736	671	1347	1337	1703	677	1260	1265	1736	687	1347	1337	1703
S002	675	1286	1278	1733	671	1374	1460	1748	690	1286	1309	1733	671	1374	1414	1748
S002	692	1332	1408	1837	931	1726	1839	2111	692	1332	1408	1837	958	1726	1825	2111
S002	726	1394	1524	1921	691	1445	1489	1871	699	1394	1511	1921	691	1445	1475	1871
S002	704	1372	1474	1892	732	1495	1557	1912	690	1372	1433	1892	718	1495	1544	1912
S002	600	1381	1453	1865	732	1477	1516	1901	697	1381	1440	1865	746	1477	1516	1901
S002	675	1381	1487	1873	716	1470	1528	1891	689	1381	1432	1873	716	1470	1528	1891
S002	728	1420	1471	1930	724	1486	1577	1879	701	1420	1444	1930	724	1486	1535	1879
S002	711	1407	1564	1914	688	1477	1569	1877	697	1407	1509	1914	729	1477	1541	1877
S002	778	1448	1534	1942	806	1537	1604	1957	778	1448	1521	1942	792	1537	1590	1957
S003	630	1177	1204	1625	744	1366	1499	1757	663	1177	1204	1625	789	1366	1473	1757
S003	608	1055	1088	1514	662	1219	1238	1515	624	1055	1063	1514	696	1219	1212	1515
S003	610	1143	1148	1576	670	1279	1335	1585	658	1143	1135	1576	677	1279	1348	1585
S003	622	1189	1210	1670	673	1272	1324	1635	642	1189	1210	1670	692	1272	1349	1635
S003	623	1115	1165	1598	648	1278	1352	1597	636	1115	1165	1598	656	1278	1339	1597
S003	593	1098	1166	1546	669	1260	1329	1579	599	1098	1115	1546	684	1260	1342	1579
S003	635	1162	1220	1657	659	1252	1259	1614	652	1162	1207	1657	691	1252	1323	1614
S003	626	1177	1265	1714	678	1291	1347	1671	633	1177	1214	1714	677	1291	1360	1671
S003	602	1280	1318	1788	735	1385	1430	1742	609	1280	1267	1788	747	1385	1430	1742
S003	676	1289	1482	1934	1064	1810	1894	2251	675	1289	1470	1934	1087	1810	1954	2251
S003	587	1372	1534	1979	771	1519	1557	1987	679	1372	1510	1979	799	1519	1593	1987
S003	690	1323	1457	1902	746	1508	1604	1928	711	1323	1481	1902	762	1508	1592	1928
S003	689	1265	1457	1878	748	1439	1542	1848	698	1265	1469	1878	760	1439	1542	1848
S003	656	1350	1553	1976	752	1501	1608	1936	686	1350	1565	1976	754	1501	1632	1936
S003	773	1603	1936	2299	785	1657	1743	2121	793	1603	1828	2299	816	1657	1743	2121
S004	521	1025	1076	1505	811	1354	1340	1646	534	1025	1076	1505	824	1354	1353	1646
S004	551	1028	1054	1491	661	1210	1177	1474	513	1028	1016	1491	661	1210	1151	1474
S004	531	1058	1072	1578	671	1235	1264	1552	518	1058	1124	1578	671	1235	1199	1552
S004	539	1046	1145	1561	679	1245	1234	1552	539	1046	1094	1561	666	1245	1182	1552
S004	500	1000	1093	1503	688	1215	1230	1509	435	1000	1067	1503	714	1215	1204	1509
S004	506	1021	1190	1608	701	1249	1230	1521	506	1021	1125	1608	688	1249	1178	1521
S004	446	971	1142	1561	753	1277	1269	1567	472	971	1026	1561	766	1277	1230	1567
S004	471	986	1232	1651	721	1338	1327	1622	471	986	1142	1651	721	1338	1289	1622
S004	523	990	1193	1586	789	1347	1279	1627	497	990	1116	1586	776	1347	1253	1627
S004	597	1157	1548	1864	958	1628	1704	1980	597	1157	1391	1864	946	1628	1620	1980
S004	526	1151	1477	1883	784	1459	1470	1837	526	1151	1405	1883	784	1459	1446	1837
S004	485	1085	1304	1735	837	1450	1511	1817	521	1085	1243	1735	788	1450	1451	1817
S004	544	1160	1495	1857	753	1410	1463	1772	520	1160	1374	1857	777	1410	1415	1772
S004	480	1145	1335	1751	823	1486	1521	1884	504	1145	1287	1751	835	1486	1509	1884
S004	643	1291	1498	1963	745	1423	1479	1814	643	1291	1498	1963	769	1423	1515	1814
S004	522	1233	1437	1853	808	1475	1543	1904	510	1233	1413	1853	833	1475	1519	1904
S005	639	1363	1475	1834	792	1546	1566	1919	634	1363	1377	1834	833	1546	1406	1919
S005	651	1411	1574	1878	768	1459	1462	1835	658	1411	1370	1878	772	1459	1360	1835
S005	588	1391	1480	1863	786	1489	1535	1894	761	1391	1395	1863	779	1489	1552	1894
S005	682	1413	1376	1881	744	1443	1505	1868	724	1413	1405	1881	773	1443	1500	1868
S005	783	1433	1409	1893	790	1465	1527	1901	762	1433	1412	1893	808	1465	1489	1901
S005	718	1417	1387	1899	784	1444	1428	1843	695	1417	1392	1899	780	1444	1508	1843
S005	683	1403	1408	1897	762	1515	1536	1921	762	1403	1443	1897	748	1515	1553	1921
S005	768	1493	1493	2039	798	1537	1616	1959	753	1493	1481	2039	777	1537	1520	1959
S005	804	1561	1585	2065	784	1605	1651	2022	819	1561	1562	2065	753	1605	1681	2022
S005	813	1744	1928	2347	979	1867	1991	2443	919	1744	1874	2347	990	1867	1983	2443
S005	820	1676	1914	2311	843	1720	1876	2253	868	1676	1874	2311	869	1720	1901	2253
S005	831	1719	1900	2357	872	1785	1982	2368	918	1719	1911	2357	912	1785	1969	2368
S005	880	1690	1731	2287	863	1801	1978	2373	934	1690	1733	2287	865	1801	1987	2373
S005	854	1875	1839	2380	776	1759	1938	2340	930	1875	1820	2380	762	1759	1923	2340
S005	838	1820	1942	2396	816	1751	1848	2280	949	1820	1916	2396	834	1751	1866	2280
S006	629	1102	1142	1601	748	1467	1503	1779	587	1102	1142	1601	755	1467	1490	1779
S006	596	1059	1050	1496	618	1229	1220	1505	585	1059	1050	1496	652	1229	1271	1505
S006	645	1140	1153	1598	685	1255	1288	1569	663	1140	1153	1598	669	1255	1314	1569
S006	615	1169	1167	1666	714	1279	1370	1627	638	1169	1193	1666	738	1279	1422	1627
S006	694	1204	1178	1650	660	1321	1394	1655	649	1204	1165	1650	672	1321	1239	1655
S006	663	1254	1282	1733	735	1386	1403	1712	663	1254	1269	1733	758	1386	1403	1712
S006	577	1237	1290	1779	681	1346	1406	1702	671	1237	1329	1779	723	1346	1393	1702
S006	570	1181	1214	1709	699	1403	1420	1744	594	1181	1214	1709	749	1403	1381	1744
S006	592	1214	1259	1736	736	1392	1339	1698	588	1214	1259	1736	759	1392	1339	1698
S006	683	1319	1422	1881	851	1732	1768	2074	699	1319	1448	1881	891	1732	1781	2074
S006	665	1353	1437	2451	749	1536	1577	1904	727	1353	1424	2451	777	1536	1616	1904
S006	227	931	1114	1567	817	1651	1633	2037	263	931	1127	1567	885	1651	1633	2037
S006	663	1410	1623	2082	850	1621	1647	2046	720	1410	1598	2082	809	1621	1647	2046
S006	661	1377	1476	2055	832	1633	1665	2039	702	1377	1489	2055	826	1633	1704	2039
S006	774	1484	1562	2108	796	1714	1728	2121	853	1484	1562	2108	812	1714	1702	2121
S006	772	1453	1492	2048	889	1667	1774	2062	808	1453	1505	2048	845	1667	1722	2062
S007	613	1267	1200	1672	759	1359	1439	1773	635	1267	1186	1672	800	1359	1494	1773
S007	650	1256	1199	1645	696	1246	1229	1660	611	1256	1174	1645	681	1246	1307	1660
S007	656	1313	1257	1725	676	1256	1303	1684	694	1313	1245	1725	675	1256	1319	1684
S007	577	1279	1234	1679	684	1248	1352	1702	530	1279	1199	1679	707	1248	1339	1702
S007	687	1355	1289	1762	651	1287	1306	1712	715	1355	1266	1762	671	1287	1359	1712
S007	600	1318	1291	1728	707	1332	1343	1745	632	1318	1245	1728	718	1332	1381	1745
S007	678	1347	1296	1750	695	1331	1378	1766	688	1347	1270	1750	707	1331	1407	1766
S007	648	1312	1264	1727	686	1300	1330	1731	666	1312	1211	1727	701	1300	1345	1731
S007	739	1339	1240	1774	705	1357	1348	1716	735	1339	1274	1774	716	1357	1422	1716
S007	668	1352	1323	1837	711	1356	1335	1784	664	1352	1315	1837	722	1356	1404	1784
S007	800	1730	1811	2311	962	1868	1974	2473	817	1730	1819	2311	999	1868	2006	2473
S007	682	1519	1523	2054	841	1605	1729	2151	720	1519	1529	2054	871	1605	1708	2151
S007	728	1564	1629	2118	799	1545	1601	2048	747	1564	1595	2118	801	1545	1594	2048
S007	813	1675	1726	2242	860	1642	1823	2240	815	1675	1690	2242	846	1642	1815	2240
S007	733	1678	1630	2158	889	1680	1715	2192	742	1678	1606	2158	896	1680	1783	2192
S007	726	1580	1494	2011	879	1591	1738	2101	731	1580	1485	2011	862	1591	1688	2101
S007	695	1656	1561	2160	774	1502	1659	2017	702	1656	1616	2160	777	1502	1591	2017
S008	517	1078	1048	1524	741	1237	1239	1606	523	1078	1060	1524	753	1237	1352	1606
S008	491	1043	1007	1456	695	1175	1194	1503	553	1043	987	1456	706	1175	1259	1503
S008	550	1065	1086	1547	699	1162	1187	1479	558	1065	1074	1547	695	1162	1185	1479
S008	505	1043	1061	1504	717	1226	1294	1554	528	1043	1019	1504	708	1226	1286	1554
S008	524	1045	1066	1500	710	1210	1211	1526	563	1045	1074	1500	702	1210	1239	1526
S008	574	1105	1114	1593	677	1231	1220	1556	611	1105	1148	1593	699	1231	1257	1556
S008	551	1068	1133	1579	727	1254	1276	1558	572	1068	1129	1579	707	1254	1280	1558
S008	581	1125	1166	1675	720	1299	1266	1620	608	1125	1197	1675	744	1299	1265	1620
S008	631	1172	1219	1721	756	1388	1348	1672	626	1172	1246	1721	771	1388	1349	1672
S008	701	1353	1489	1964	910	1611	1593	2045	692	1353	1497	1964	926	1611	1669	2045
S008	619	1273	1485	1933	825	1458	1529	1905	623	1273	1532	1933	814	1458	1503	1905
S008	619	1291	1389	1857	819	1526	1595	1953	652	1291	1382	1857	845	1526	1593	1953
S008	658	1391	1461	2013	790	1458	1479	1920	694	1391	1532	2013	796	1458	1535	1920
S008	634	1386	1461	2008	827	1473	1529	1962	655	1386	1555	2008	870	1473	1618	1962
S008	671	1416	1485	2003	858	1520	1579	2002	703	1416	1455	2003	862	1520	1638	2002
S009	670	1175	1193	1524	769	1334	1354	1664	678	1175	1173	1524	777	1334	1360	1664
S009	576	1105	1139	1458	667	1141	1161	1477	584	1105	1117	1458	656	1141	1219	1477
S009	514	1080	1105	1470	652	1088	1123	1414	526	1080	1108	1470	628	1088	1068	1414
S009	623	1100	1105	1488	707	1161	1164	1493	580	1100	1088	1488	664	1161	1153	1493
S009	622	1139	1165	1520	677	1176	1033	1538	585	1139	1161	1520	676	1176	1097	1538
S009	560	1123	1115	1507	684	1151	1182	1494	588	1123	1115	1507	674	1151	1176	1494
S009	569	1153	1125	1529	691	1164	1143	1511	599	1153	1181	1529	685	1164	1168	1511
S009	550	1128	1144	1482	671	1179	1195	1525	594	1128	1126	1482	685	1179	1193	1525
S009	561	1133	1163	1502	642	1159	1140	1480	605	1133	1125	1502	653	1159	1136	1480
S009	563	1138	1131	1518	669	1151	1146	1485	564	1138	1128	1518	672	1151	1149	1485
S009	595	1163	1192	1565	674	1197	1209	1546	589	1163	1196	1565	692	1197	1163	1546
S009	653	1293	1381	1770	871	1502	1642	1923	658	1293	1370	1770	880	1502	1572	1923
S009	653	1286	1352	1764	785	1331	1460	1775	679	1286	1324	1764	789	1331	1455	1775
S009	628	1281	1368	1756	719	1364	1362	1749	628	1281	1387	1756	718	1364	1389	1749
S009	633	1276	1340	1753	747	1337	1405	1747	653	1276	1381	1753	729	1337	1384	1747
S009	676	1322	1432	1794	765	1365	1464	1790	655	1322	1440	1794	768	1365	1470	1790
S009	668	1279	1301	1745	782	1347	1415	1768	663	1279	1323	1745	753	1347	1409	1768
S009	683	1330	1323	1807	749	1365	1414	1773	683	1330	1349	1807	771	1365	1375	1773
S009	667	1361	1477	1864	757	1376	1524	1817	652	1361	1467	1864	738	1376	1450	1817
S010	540	1143	1212	1564	738	1351	1349	1608	543	1143	1224	1564	763	1351	1407	1608
S010	674	1214	1227	1666	697	1365	1319	1679	676	1214	1264	1666	703	1365	1384	1679
S010	689	1202	1295	1660	678	1338	1358	1646	701	1202	1370	1660	696	1338	1378	1646
S010	687	1174	1167	1630	723	1329	1291	1636	670	1174	1184	1630	723	1329	1311	1636
S010	693	1195	1193	1672	685	1333	1296	1655	687	1195	1251	1672	666	1333	1372	1655
S010	697	1206	1332	1660	727	1356	1374	1687	688	1206	1313	1660	746	1356	1365	1687
S010	689	1214	1436	1718	675	1338	1312	1652	675	1214	1450	1718	719	1338	1369	1652
S010	636	1155	1343	1683	739	1378	1409	1673	636	1155	1348	1683	733	1378	1377	1673
S010	656	1229	1456	1803	763	1444	1454	1743	675	1229	1449	1803	757	1444	1401	1743
S010	676	1227	1494	1868	804	1501	1444	1748	674	1227	1492	1868	798	1501	1448	1748
S010	737	1320	1667	1967	915	1742	1637	2074	718	1320	1660	1967	903	1742	1677	2074
S010	628	1335	1712	2042	774	1632	1668	1983	696	1335	1706	2042	786	1632	1535	1983
S010	680	1382	1759	2093	828	1693	1728	2068	723	1382	1714	2093	810	1693	1714	2068
S010	693	1420	1555	1966	842	1730	1703	2146	736	1420	1690	1966	866	1730	1771	2146
S010	752	1404	1709	2071	758	1609	1678	1957	777	1404	1712	2071	752	1609	1663	1957
S010	688	1354	1573	2019	839	1630	1624	1968	719	1354	1593	2019	821	1630	1638	1968
S010	670	1374	1767	2052	866	1700	1761	2035	701	1374	1723	2052	884	1700	1733	2035
S010	730	1409	1727	2125	850	1697	1723	2097	749	1409	1727	2125	881	1697	1748	2097
S011	563	1157	1280	1556	763	1349	1366	1653	640	1157	1219	1556	735	1349	1335	1653
S011	577	1107	1141	1494	690	1238	1226	1514	615	1107	1160	1494	651	1238	1224	1514
S011	580	1092	1243	1502	635	1213	1212	1485	580	1092	1252	1502	640	1213	1246	1485
S011	598	1128	1185	1526	675	1227	1268	1535	592	1128	1203	1526	658	1227	1259	1535
S011	619	1141	1159	1547	637	1231	1274	1546	624	1141	1158	1547	621	1231	1260	1546
S011	603	1156	1235	1593	639	1200	1200	1545	558	1156	1192	1593	644	1200	1217	1545
S011	617	1126	1279	1566	663	1286	1319	1575	628	1126	1206	1566	663	1286	1296	1575
S011	593	1111	1213	1557	668	1271	1189	1529	615	1111	1199	1557	668	1271	1252	1529
S011	583	1114	1334	1556	692	1306	1283	1586	594	1114	1139	1556	714	1306	1286	1586
S011	635	1263	1347	1701	647	1286	1279	1590	646	1263	1373	1701	664	1286	1280	1590
S011	726	1333	1445	1865	950	1696	1754	2056	731	1333	1430	1865	930	1696	1812	2056
S011	687	1358	1530	1964	729	1467	1552	1843	682	1358	1622	1964	695	1467	1582	1843
S011	665	1325	1516	1910	818	1580	1635	1939	694	1325	1561	1910	784	1580	1627	1939
S011	706	1330	1484	1852	796	1541	1610	1921	711	1330	1520	1852	787	1541	1644	1921
S011	718	1457	1678	2021	749	1504	1651	1965	709	1457	1682	2021	745	1504	1583	1965
S011	754	1397	1631	1975	822	1577	1697	1930	764	1397	1665	1975	803	1577	1583	1930
S011	740	1489	1631	2000	829	1573	1705	1975	755	1489	1622	2000	819	1573	1662	1975
S012	605	1140	1183	1559	705	1276	1228	1601	620	1140	1204	1559	695	1276	1312	1601
S012	587	1091	1137	1478	700	1199	1140	1533	603	1091	1159	1478	664	1199	1209	1533
S012	663	1161	1269	1556	680	1199	1175	1542	678	1161	1245	1556	667	1199	1239	1542
S012	621	1177	1226	1577	665	1231	1202	1572	658	1177	1197	1577	650	1231	1255	1572
S012	667	1172	1272	1627	675	1222	1212	1560	639	1172	1217	1627	658	1222	1269	1560
S012	636	1179	1283	1602	697	1281	1220	1643	653	1179	1280	1602	684	1281	1317	1643
S012	616	1168	1235	1561	678	1260	1255	1577	658	1168	1248	1561	681	1260	1282	1577
S012	610	1183	1270	1639	669	1251	1316	1610	634	1183	1234	1639	646	1251	1323	1610
S012	635	1191	1323	1659	655	1278	1233	1620	685	1191	1324	1659	666	1278	1310	1620
S012	600	1219	1301	1715	686	1310	1332	1657	617	1219	1404	1715	692	1310	1292	1657
S012	814	1526	1850	2152	934	1749	1909	2221	830	1526	1842	2152	928	1749	1906	2221
S012	697	1337	1564	1855	892	1627	1638	2037	784	1337	1588	1855	875	1627	1661	2037
S012	684	1316	1502	1820	733	1407	1491	1797	803	1316	1540	1820	732	1407	1526	1797
S012	681	1349	1512	1845	777	1435	1464	1804	722	1349	1502	1845	785	1435	1531	1804
S012	690	1349	1581	1870	779	1493	1525	1898	717	1349	1609	1870	777	1493	1572	1898
S012	674	1418	1601	1907	783	1481	1505	1890	745	1418	1613	1907	807	1481	1539	1890
S012	789	1487	1716	2043	807	1528	1590	1947	843	1487	1671	2043	786	1528	1624	1947
S013	653	1127	1258	1617	805	1415	1465	1743	641	1127	1197	1617	878	1415	1440	1743
S013	632	1141	1210	1644	713	1251	1304	1623	615	1141	1303	1644	770	1251	1343	1623
S013	625	1108	1285	1605	754	1240	1277	1606	634	1108	1300	1605	739	1240	1339	1606
S013	575	1152	1318	1645	744	1302	1295	1660	631	1152	1281	1645	768	1302	1335	1660
S013	649	1156	1323	1676	735	1288	1327	1644	665	1156	1326	1676	754	1288	1409	1644
S013	638	1128	1216	1636	756	1275	1320	1646	652	1128	1236	1636	767	1275	1346	1646
S013	653	1159	1286	1688	747	1310	1339	1674	657	1159	1307	1688	795	1310	1357	1674
S013	685	1193	1262	1731	738	1337	1343	1709	648	1193	1303	1731	751	1337	1351	1709
S013	673	1246	1334	1833	803	1367	1409	1752	641	1246	1340	1833	798	1367	1442	1752
S013	750	1273	1460	1831	977	1660	1736	2089	740	1273	1462	1831	984	1660	1750	2089
S013	701	1250	1435	1813	802	1399	1464	1761	696	1250	1467	1813	798	1399	1405	1761
S013	693	1228	1380	1788	871	1405	1509	1810	694	1228	1412	1788	848	1405	1523	1810
S013	711	1327	1481	1876	831	1456	1456	1865	756	1327	1460	1876	845	1456	1466	1865
S013	785	1322	1423	1902	831	1462	1578	1888	803	1322	1482	1902	830	1462	1538	1888
S013	653	1278	1459	1868	797	1404	1495	1818	702	1278	1483	1868	811	1404	1509	1818
S013	759	1393	1578	2027	845	1504	1471	1974	737	1393	1604	2027	848	1504	1546	1974
S014	680	1139	1245	1530	774	1261	1351	1653	701	1139	1213	1530	773	1261	1395	1653
S014	664	1130	1228	1537	648	1113	1225	1516	663	1130	1231	1537	645	1113	1239	1516
S014	709	1160	1218	1566	672	1134	1237	1558	718	1160	1230	1566	654	1134	1232	1558
S014	670	1178	1220	1574	697	1156	1302	1583	677	1178	1194	1574	670	1156	1293	1583
S014	664	1158	1201	1576	668	1129	1274	1546	688	1158	1201	1576	657	1129	1251	1546
S014	712	1171	1262	1571	718	1148	1296	1581	715	1171	1271	1571	691	1148	1291	1581
S014	709	1196	1314	1597	692	1171	1283	1595	691	1196	1236	1597	684	1171	1263	1595
S014	653	1189	1286	1588	679	1172	1325	1591	663	1189	1269	1588	670	1172	1292	1591
S014	730	1231	1362	1698	684	1186	1303	1618	710	1231	1360	1698	670	1186	1331	1618
S014	682	1237	1425	1734	744	1255	1322	1692	703	1237	1435	1734	715	1255	1425	1692
S014	857	1445	1627	1957	967	1627	1774	2165	863	1445	1571	1957	952	1627	1805	2165
S014	778	1390	1608	1919	776	1388	1535	1900	795	1390	1532	1919	782	1388	1562	1900
S014	797	1380	1579	1898	790	1369	1464	1889	779	1380	1583	1898	780	1369	1478	1889
S014	789	1408	1463	1901	791	1400	1550	1897	788	1408	1487	1901	779	1400	1589	1897
S014	741	1373	1548	1878	796	1351	1543	1868	742	1373	1527	1878	785	1351	1575	1868
S014	777	1384	1500	1927	794	1370	1565	1901	767	1384	1514	1927	801	1370	1591	1901
S014	801	1428	1643	1988	807	1433	1614	1953	791	1428	1605	1988	798	1433	1680	1953
S015	521	1077	1202	1539	784	1392	1419	1726	538	1077	1163	1539	799	1392	1424	1726
S015	498	1148	1210	1576	668	1246	1272	1595	646	1148	1222	1576	652	1246	1272	1595
S015	563	1183	1244	1674	652	1254	1271	1604	607	1183	1251	1674	662	1254	1300	1604
S015	529	1155	1257	1631	704	1289	1369	1634	667	1155	1218	1631	699	1289	1343	1634
S015	663	1206	1297	1741	695	1317	1314	1656	665	1206	1322	1741	700	1317	1326	1656
S015	562	1164	1274	1672	726	1377	1391	1720	646	1164	1259	1672	729	1377	1410	1720
S015	670	1196	1444	1751	724	1350	1389	1709	665	1196	1278	1751	737	1350	1363	1709
S015	684	1203	1287	1766	717	1405	1414	1770	685	1203	1323	1766	750	1405	1432	1770
S015	682	1224	1317	1771	743	1390	1377	1771	685	1224	1304	1771	708	1390	1396	1771
S015	552	1207	1279	1780	736	1400	1340	1728	629	1207	1398	1780	752	1400	1378	1728
S015	621	1321	1614	1989	955	1746	1819	2154	725	1321	1500	1989	962	1746	1783	2154
S015	566	1282	1559	1880	749	1528	1535	1968	672	1282	1395	1880	811	1528	1564	1968
S015	569	1306	1666	1997	780	1462	1502	1898	671	1306	1404	1997	778	1462	1506	1898
S015	610	1341	1577	1985	804	1548	1629	2006	692	1341	1430	1985	801	1548	1616	2006
S015	637	1362	1682	2033	810	1550	1674	2011	741	1362	1510	2033	813	1550	1654	2011
S015	681	1431	1661	2029	823	1589	1739	2096	747	1431	1562	2029	805	1589	1734	2096
S015	677	1425	1760	2159	843	1543	1629	2006	736	1425	1722	2159	794	1543	1630	2006
S001	529	1125	1194	1461	816	1307	1347	1572	565	1125	1150	1461	830	1307	1346	1572
S001	546	1058	1131	1410	736	1153	1186	1421	567	1058	1074	1410	747	1153	1185	1421
S001	554	1060	1139	1389	706	1128	1170	1418	551	1060	1119	1389	720	1128	1167	1418
S001	576	1109	1141	1460	706	1096	1163	1419	582	1109	1081	1460	730	1096	1204	1419
S001	581	1128	1159	1464	719	1149	1236	1514	611	1128	1101	1464	723	1149	1179	1514
S001	643	1217	1335	1588	670	1164	1214	1474	661	1217	1246	1588	697	1164	1179	1474
S001	574	1146	1192	1524	788	1195	1292	1560	588	1146	1147	1524	781	1195	1306	1560
S001	582	1152	1207	1519	714	1167	1271	1506	587	1152	1129	1519	727	1167	1243	1506
S001	568	1129	1167	1495	753	1158	1183	1478	583	1129	1108	1495	744	1158	1183	1478
S001	592	1205	1251	1599	774	1204	1238	1538	611	1205	1205	1599	764	1204	1254	1538
S001	688	1338	1416	1817	972	1704	1762	2061	691	1338	1325	1817	1028	1704	1727	2061
S001	665	1307	1361	1769	799	1412	1445	1759	673	1307	1307	1769	814	1412	1433	1759
S001	715	1305	1380	1768	821	1421	1442	1815	719	1305	1322	1768	847	1421	1401	1815
S001	672	1296	1399	1752	763	1362	1402	1739	678	1296	1337	1752	799	1362	1353	1739
S001	695	1303	1297	1737	805	1370	1432	1777	709	1303	1296	1737	827	1370	1421	1777
S001	708	1362	1404	1783	778	1376	1380	1729	715	1362	1382	1783	785	1376	1363	1729
S001	713	1355	1396	1837	818	1382	1458	1802	723	1355	1374	1837	815	1382	1449	1802
S002	591	1239	1285	1672	825	1533	1567	1900	599	1239	1333	1672	830	1533	1573	1900
S002	629	1154	1234	1572	635	1269	1312	1605	642	1154	1199	1572	644	1269	1295	1605
S002	638	1198	1218	1616	643	1261	1272	1603	609	1198	1197	1616	671	1261	1280	1603
S002	659	1193	1199	1609	669	1265	1306	1613	635	1193	1223	1609	668	1265	1257	1613
S002	671	1223	1251	1643	628	1270	1290	1623	637	1223	1205	1643	666	1270	1327	1623
S002	721	1306	1326	1748	659	1340	1360	1720	697	1306	1296	1748	675	1340	1346	1720
S002	651	1239	1296	1667	664	1326	1342	1679	664	1239	1314	1667	669	1326	1289	1679
S002	677	1278	1330	1718	679	1339	1381	1712	701	1278	1310	1718	674	1339	1365	1712
S002	669	1260	1314	1736	652	1347	1338	1703	666	1260	1255	1736	676	1347	1347	1703
S002	683	1286	1344	1733	651	1374	1369	1748	665	1286	1316	1733	677	1374	1358	1748
S002	621	1332	1381	1837	937	1726	1726	2111	723	1332	1375	1837	952	1726	1751	2111
S002	712	1394	1479	1921	690	1445	1479	1871	731	1394	1474	1921	705	1445	1411	1871
S002	677	1372	1422	1892	719	1495	1543	1912	701	1372	1500	1892	725	1495	1486	1912
S002	584	1381	1458	1865	735	1477	1502	1901	654	1381	1508	1865	740	1477	1493	1901
S002	669	1381	1471	1873	691	1470	1465	1891	708	1381	1469	1873	730	1470	1501	1891
S002	631	1420	1491	1930	692	1486	1467	1879	716	1420	1533	1930	712	1486	1474	1879
S002	636	1407	1539	1914	691	1477	1494	1877	686	1407	1559	1914	706	1477	1366	1877
S002	643	1448	1539	1942	786	1537	1567	1957	746	1448	1554	1942	802	1537	1518	1957
S003	645	1177	1324	1625	765	1366	1417	1757	640	1177	1345	1625	796	1366	1416	1757
S003	619	1055	1244	1514	675	1219	1233	1515	632	1055	1200	1514	675	1219	1225	1515
S003	651	1143	1256	1576	679	1279	1324	1585	676	1143	1261	1576	700	1279	1277	1585
S003	648	1189	1306	1670	673	1272	1305	1635	641	1189	1338	1670	673	1272	1232	1635
S003	637	1115	1215	1598	664	1278	1235	1597	631	1115	1242	1598	681	1278	1172	1597
S003	605	1098	1170	1546	680	1260	1238	1579	617	1098	1116	1546	676	1260	1201	1579
S003	632	1162	1237	1657	674	1252	1191	1614	646	1162	1274	1657	664	1252	1240	1614
S003	642	1177	1361	1714	673	1291	1203	1671	624	1177	1373	1714	693	1291	1210	1671
S003	621	1280	1327	1788	735	1385	1300	1742	614	1280	1311	1788	778	1385	1294	1742
S003	688	1289	1547	1934	1074	1810	1846	2251	686	1289	1537	1934	1082	1810	1845	2251
S003	591	1372	1607	1979	774	1519	1439	1987	615	1372	1539	1979	791	1519	1530	1987
S003	707	1323	1504	1902	731	1508	1497	1928	692	1323	1463	1902	780	1508	1519	1928
S003	706	1265	1465	1878	748	1439	1469	1848	694	1265	1457	1878	772	1439	1374	1848
S003	653	1350	1581	1976	750	1501	1522	1936	679	1350	1611	1976	755	1501	1518	1936
S003	791	1603	1882	2299	790	1657	1662	2121	808	1603	1884	2299	795	1657	1679	2121
S004	526	1025	1104	1505	794	1354	1332	1646	541	1025	1135	1505	805	1354	1313	1646
S004	526	1028	1064	1491	660	1210	1151	1474	542	1028	1067	1491	674	1210	1122	1474
S004	521	1058	1166	1578	665	1235	1229	1552	549	1058	1143	1578	672	1235	1205	1552
S004	522	1046	1127	1561	659	1245	1210	1552	520	1046	1139	1561	660	1245	1202	1552
S004	513	1000	1098	1503	693	1215	1176	1509	499	1000	1084	1503	700	1215	1199	1509
S004	523	1021	1127	1608	662	1249	1139	1521	545	1021	1234	1608	723	1249	1171	1521
S004	447	971	1119	1561	734	1277	1238	1567	469	971	1115	1561	768	1277	1190	1567
S004	472	986	1144	1651	719	1338	1304	1622	492	986	1197	1651	750	1338	1267	1622
S004	467	990	1160	1586	750	1347	1281	1627	476	990	1121	1586	781	1347	1220	1627
S004	596	1157	1437	1864	939	1628	1585	1980	587	1157	1438	1864	977	1628	1628	1980
S004	463	1151	1373	1883	765	1459	1443	1837	482	1151	1414	1883	796	1459	1399	1837
S004	506	1085	1303	1735	804	1450	1387	1817	503	1085	1250	1735	847	1450	1361	1817
S004	534	1160	1424	1857	762	1410	1408	1772	519	1160	1458	1857	805	1410	1399	1772
S004	489	1145	1292	1751	821	1486	1486	1884	485	1145	1296	1751	824	1486	1458	1884
S004	451	1291	1529	1963	731	1423	1390	1814	605	1291	1513	1963	763	1423	1390	1814
S004	482	1233	1385	1853	799	1475	1470	1904	490	1233	1405	1853	813	1475	1511	1904
S005	606	1363	1464	1834	770	1546	1586	1919	627	1363	1433	1834	821	1546	1616	1919
S005	611	1411	1519	1878	751	1459	1505	1835	642	1411	1530	1878	782	1459	1463	1835
S005	746	1391	1469	1863	754	1489	1518	1894	623	1391	1511	1863	826	1489	1456	1894
S005	732	1413	1527	1881	750	1443	1452	1868	639	1413	1558	1881	781	1443	1493	1868
S005	803	1433	1536	1893	761	1465	1505	1901	772	1433	1495	1893	761	1465	1453	1901
S005	686	1417	1543	1899	761	1444	1411	1843	686	1417	1512	1899	802	1444	1432	1843
S005	739	1403	1472	1897	756	1515	1499	1921	718	1403	1472	1897	776	1515	1561	1921
S005	742	1493	1486	2039	766	1537	1571	1959	742	1493	1486	2039	787	1537	1561	1959
S005	810	1561	1615	2065	728	1605	1647	2022	779	1561	1584	2065	759	1605	1657	2022
S005	918	1744	1882	2347	959	1867	1888	2443	729	1744	1942	2347	985	1867	1888	2443
S005	946	1676	1841	2311	813	1720	1829	2253	791	1676	1867	2311	831	1720	1820	2253
S005	899	1719	1863	2357	867	1785	1891	2368	821	1719	1931	2357	867	1785	1960	2368
S005	882	1690	1717	2287	874	1801	1881	2373	891	1690	1881	2287	857	1801	1907	2373
S005	876	1875	1814	2380	764	1759	1875	2340	876	1875	1848	2380	773	1759	1849	2340
S005	888	1820	1818	2396	825	1751	1832	2280	811	1820	1895	2396	851	1751	1884	2280
S006	588	1102	1407	1601	769	1467	1515	1779	577	1102	1317	1601	813	1467	1485	1779
S006	573	1059	1345	1496	691	1229	1215	1505	585	1059	1144	1496	669	1229	1203	1505
S006	622	1140	1456	1598	678	1255	1296	1569	604	1140	1249	1598	679	1255	1256	1569
S006	657	1169	1484	1666	722	1279	1367	1627	606	1169	1269	1666	737	1279	1339	1627
S006	651	1204	1465	1650	660	1321	1319	1655	601	1204	1204	1650	693	1321	1287	1655
S006	681	1254	1380	1733	739	1386	1371	1712	664	1254	1283	1733	785	1386	1353	1712
S006	622	1237	1422	1779	707	1346	1393	1702	618	1237	1297	1779	708	1346	1397	1702
S006	563	1181	1336	1709	726	1403	1371	1744	560	1181	1248	1709	753	1403	1347	1744
S006	608	1214	1395	1736	709	1392	1341	1698	598	1214	1278	1736	765	1392	1358	1698
S006	730	1319	1570	1881	909	1732	1709	2074	676	1319	1494	1881	950	1732	1638	2074
S006	663	1353	1564	2451	717	1536	1490	1904	689	1353	1498	2451	786	1536	1483	1904
S006	235	931	1196	1567	836	1651	1588	2037	243	931	1146	1567	879	1651	1567	2037
S006	758	1410	1759	2082	862	1621	1635	2046	758	1410	1662	2082	864	1621	1596	2046
S006	699	1377	1647	2055	859	1633	1598	2039	690	1377	1611	2055	875	1633	1581	2039
S006	835	1484	1749	2108	849	1714	1649	2121	804	1484	1630	2108	858	1714	1607	2121
S006	736	1453	1563	2048	906	1667	1665	2062	710	1453	1579	2048	915	1667	1603	2062
S007	624	1267	1341	1672	785	1359	1463	1773	614	1267	1255	1672	813	1359	1484	1773
S007	621	1256	1290	1645	706	1246	1335	1660	646	1256	1256	1645	692	1246	1302	1660
S007	678	1313	1331	1725	691	1256	1328	1684	695	1313	1346	1725	674	1256	1304	1684
S007	533	1279	1372	1679	684	1248	1354	1702	591	1279	1366	1679	715	1248	1283	1702
S007	750	1355	1443	1762	652	1287	1377	1712	730	1355	1391	1762	665	1287	1378	1712
S007	608	1318	1431	1728	714	1332	1351	1745	610	1318	1384	1728	730	1332	1380	1745
S007	671	1347	1493	1750	695	1331	1364	1766	700	1347	1360	1750	709	1331	1380	1766
S007	639	1312	1356	1727	695	1300	1324	1731	643	1312	1345	1727	719	1300	1370	1731
S007	734	1339	1412	1774	698	1357	1383	1716	734	1339	1405	1774	703	1357	1374	1716
S007	654	1352	1444	1837	707	1356	1409	1784	684	1352	1407	1837	742	1356	1434	1784
S007	810	1730	1993	2311	962	1868	2002	2473	828	1730	1893	2311	1023	1868	2014	2473
S007	700	1519	1818	2054	855	1605	1758	2151	711	1519	1620	2054	854	1605	1726	2151
S007	711	1564	1750	2118	776	1545	1686	2048	741	1564	1723	2118	796	1545	1641	2048
S007	822	1675	1876	2242	828	1642	1774	2240	845	1675	1744	2242	859	1642	1759	2240
S007	752	1678	1763	2158	868	1680	1807	2192	732	1678	1714	2158	896	1680	1777	2192
S007	781	1580	1612	2011	848	1591	1643	2101	759	1580	1677	2011	861	1591	1623	2101
S007	719	1656	1780	2160	768	1502	1628	2017	758	1656	1649	2160	770	1502	1597	2017
S008	532	1078	1137	1524	752	1237	1350	1606	539	1078	1159	1524	769	1237	1311	1606
S008	486	1043	1084	1456	706	1175	1250	1503	521	1043	1020	1456	712	1175	1229	1503
S008	589	1065	1194	1547	688	1162	1219	1479	571	1065	1131	1547	707	1162	1154	1479
S008	528	1043	1153	1504	721	1226	1299	1554	504	1043	1072	1504	734	1226	1302	1554
S008	563	1045	1167	1500	692	1210	1237	1526	558	1045	1083	1500	720	1210	1262	1526
S008	608	1105	1247	1593	685	1231	1250	1556	624	1105	1149	1593	692	1231	1242	1556
S008	588	1068	1213	1579	715	1254	1266	1558	554	1068	1140	1579	719	1254	1347	1558
S008	595	1125	1321	1675	730	1299	1294	1620	619	1125	1222	1675	745	1299	1287	1620
S008	654	1172	1359	1721	743	1388	1375	1672	648	1172	1251	1721	751	1388	1353	1672
S008	717	1353	1534	1964	924	1611	1660	2045	721	1353	1519	1964	959	1611	1593	2045
S008	608	1273	1570	1933	809	1458	1551	1905	623	1273	1531	1933	815	1458	1524	1905
S008	626	1291	1471	1857	802	1526	1592	1953	631	1291	1382	1857	872	1526	1629	1953
S008	673	1391	1640	2013	752	1458	1574	1920	674	1391	1590	2013	805	1458	1473	1920
S008	638	1386	1654	2008	832	1473	1504	1962	665	1386	1539	2008	861	1473	1522	1962
S008	695	1416	1533	2003	848	1520	1612	2002	695	1416	1514	2003	861	1520	1543	2002
S009	655	1175	1211	1524	768	1334	1405	1664	700	1175	1268	1524	769	1334	1348	1664
S009	510	1105	1155	1458	660	1141	1241	1477	498	1105	1252	1458	644	1141	1181	1477
S009	511	1080	1164	1470	635	1088	1127	1414	507	1080	1168	1470	613	1088	1150	1414
S009	565	1100	1203	1488	680	1161	1253	1493	555	1100	1112	1488	707	1161	1171	1493
S009	618	1139	1255	1520	663	1176	1236	1538	585	1139	1194	1520	670	1176	1196	1538
S009	549	1123	1235	1507	657	1151	1246	1494	562	1123	1213	1507	660	1151	1146	1494
S009	583	1153	1284	1529	663	1164	1196	1511	604	1153	1276	1529	695	1164	1211	1511
S009	586	1128	1191	1482	701	1179	1217	1525	552	1128	1223	1482	691	1179	1187	1525
S009	620	1133	1209	1502	684	1159	1144	1480	599	1133	1280	1502	664	1159	1118	1480
S009	578	1138	1239	1518	656	1151	1180	1485	594	1138	1296	1518	691	1151	1125	1485
S009	568	1163	1269	1565	695	1197	1219	1546	584	1163	1296	1565	704	1197	1262	1546
S009	654	1293	1461	1770	893	1502	1565	1923	670	1293	1505	1770	953	1502	1564	1923
S009	652	1286	1391	1764	771	1331	1416	1775	647	1286	1439	1764	802	1331	1405	1775
S009	642	1281	1482	1756	703	1364	1368	1749	613	1281	1465	1756	723	1364	1308	1749
S009	606	1276	1460	1753	715	1337	1353	1747	638	1276	1464	1753	729	1337	1383	1747
S009	668	1322	1535	1794	789	1365	1421	1790	649	1322	1475	1794	781	1365	1426	1790
S009	655	1279	1441	1745	740	1347	1385	1768	654	1279	1411	1745	772	1347	1418	1768
S009	684	1330	1470	1807	746	1365	1377	1773	673	1330	1448	1807	777	1365	1405	1773
S009	664	1361	1504	1864	774	1376	1486	1817	673	1361	1560	1864	742	1376	1483	1817
S010	551	1143	1204	1564	750	1351	1250	1608	534	1143	1237	1564	779	1351	1420	1608
S010	632	1214	1333	1666	699	1365	1392	1679	633	1214	1366	1666	710	1365	1392	1679
S010	667	1202	1393	1660	697	1338	1351	1646	702	1202	1404	1660	766	1338	1386	1646
S010	652	1174	1217	1630	737	1329	1317	1636	632	1174	1345	1630	710	1329	1361	1636
S010	627	1195	1353	1672	665	1333	1327	1655	634	1195	1285	1672	654	1333	1367	1655
S010	673	1206	1350	1660	728	1356	1317	1687	697	1206	1337	1660	745	1356	1395	1687
S010	634	1214	1392	1718	694	1338	1323	1652	710	1214	1423	1718	731	1338	1392	1652
S010	642	1155	1360	1683	728	1378	1341	1673	665	1155	1316	1683	731	1378	1402	1673
S010	669	1229	1467	1803	732	1444	1377	1743	655	1229	1388	1803	762	1444	1382	1743
S010	672	1227	1503	1868	771	1501	1465	1748	711	1227	1454	1868	785	1501	1342	1748
S010	722	1320	1642	1967	903	1742	1701	2074	710	1320	1630	1967	924	1742	1708	2074
S010	667	1335	1771	2042	765	1632	1595	1983	644	1335	1676	2042	770	1632	1638	1983
S010	697	1382	1778	2093	838	1693	1725	2068	719	1382	1689	2093	884	1693	1648	2068
S010	709	1420	1644	1966	843	1730	1714	2146	732	1420	1569	1966	881	1730	1676	2146
S010	759	1404	1807	2071	737	1609	1584	1957	759	1404	1710	2071	749	1609	1555	1957
S010	680	1354	1696	2019	812	1630	1602	1968	671	1354	1632	2019	837	1630	1580	1968
S010	661	1374	1766	2052	852	1700	1747	2035	728	1374	1678	2052	883	1700	1740	2035
S010	714	1409	1754	2125	866	1697	1737	2097	762	1409	1671	2125	892	1697	1760	2097
S011	572	1157	1210	1556	746	1349	1348	1653	540	1157	1191	1556	741	1349	1347	1653
S011	521	1107	1159	1494	648	1238	1236	1514	553	1107	1132	1494	676	1238	1245	1514
S011	547	1092	1235	1502	618	1213	1199	1485	556	1092	1207	1502	640	1213	1163	1485
S011	608	1128	1224	1526	639	1227	1198	1535	587	1128	1156	1526	642	1227	1239	1535
S011	630	1141	1175	1547	638	1231	1268	1546	621	1141	1117	1547	658	1231	1301	1546
S011	595	1156	1190	1593	611	1200	1256	1545	589	1156	1231	1593	627	1200	1159	1545
S011	630	1126	1232	1566	651	1286	1260	1575	621	1126	1217	1566	661	1286	1257	1575
S011	591	1111	1207	1557	674	1271	1262	1529	615	1111	1166	1557	683	1271	1206	1529
S011	582	1114	1263	1556	679	1306	1296	1586	554	1114	1160	1556	724	1306	1247	1586
S011	653	1263	1399	1701	649	1286	1265	1590	623	1263	1312	1701	643	1286	1258	1590
S011	725	1333	1597	1865	921	1696	1768	2056	741	1333	1440	1865	955	1696	1750	2056
S011	673	1358	1633	1964	690	1467	1574	1843	699	1358	1591	1964	730	1467	1541	1843
S011	704	1325	1601	1910	779	1580	1663	1939	679	1325	1563	1910	775	1580	1594	1939
S011	719	1330	1610	1852	784	1541	1594	1921	689	1330	1452	1852	803	1541	1607	1921
S011	730	1457	1734	2021	701	1504	1611	1965	732	1457	1624	2021	722	1504	1557	1965
S011	767	1397	1701	1975	775	1577	1609	1930	784	1397	1579	1975	813	1577	1616	1930
S011	736	1489	1608	2000	795	1573	1655	1975	744	1489	1588	2000	843	1573	1686	1975
S012	618	1140	1292	1559	721	1276	1280	1601	599	1140	1278	1559	712	1276	1263	1601
S012	593	1091	1167	1478	683	1199	1292	1533	600	1091	1142	1478	736	1199	1186	1533
S012	671	1161	1244	1556	669	1199	1228	1542	673	1161	1233	1556	681	1199	1268	1542
S012	656	1177	1222	1577	640	1231	1249	1572	669	1177	1210	1577	617	1231	1278	1572
S012	663	1172	1344	1627	659	1222	1247	1560	652	1172	1341	1627	734	1222	1257	1560
S012	656	1179	1273	1602	691	1281	1279	1643	650	1179	1293	1602	679	1281	1303	1643
S012	624	1168	1226	1561	661	1260	1284	1577	618	1168	1214	1561	679	1260	1276	1577
S012	604	1183	1350	1639	639	1251	1342	1610	645	1183	1343	1639	645	1251	1306	1610
S012	672	1191	1281	1659	642	1278	1223	1620	640	1191	1246	1659	659	1278	1265	1620
S012	590	1219	1407	1715	692	1310	1337	1657	606	1219	1322	1715	719	1310	1325	1657
S012	775	1526	1791	2152	906	1749	1897	2221	837	1526	1825	2152	929	1749	1901	2221
S012	743	1337	1533	1855	868	1627	1652	2037	757	1337	1513	1855	852	1627	1647	2037
S012	720	1316	1591	1820	738	1407	1541	1797	694	1316	1465	1820	727	1407	1498	1797
S012	712	1349	1496	1845	766	1435	1506	1804	689	1349	1468	1845	777	1435	1468	1804
S012	693	1349	1615	1870	775	1493	1471	1898	635	1349	1583	1870	788	1493	1495	1898
S012	742	1418	1639	1907	771	1481	1518	1890	701	1418	1616	1907	786	1481	1485	1890
S012	786	1487	1770	2043	800	1528	1522	1947	762	1487	1734	2043	800	1528	1515	1947
S013	628	1127	1209	1617	816	1415	1425	1743	638	1127	1197	1617	868	1415	1437	1743
S013	631	1141	1269	1644	722	1251	1338	1623	627	1141	1288	1644	759	1251	1309	1623
S013	621	1108	1310	1605	726	1240	1299	1606	644	1108	1168	1605	769	1240	1357	1606
S013	572	1152	1282	1645	747	1302	1285	1660	572	1152	1187	1645	779	1302	1357	1660
S013	690	1156	1300	1676	757	1288	1324	1644	662	1156	1268	1676	744	1288	1322	1644
S013	613	1128	1237	1636	748	1275	1307	1646	630	1128	1153	1636	752	1275	1413	1646
S013	654	1159	1357	1688	743	1310	1346	1674	673	1159	1243	1688	777	1310	1364	1674
S013	644	1193	1418	1731	783	1337	1356	1709	647	1193	1244	1731	755	1337	1389	1709
S013	633	1246	1407	1833	773	1367	1403	1752	678	1246	1339	1833	827	1367	1350	1752
S013	731	1273	1459	1831	967	1660	1707	2089	745	1273	1435	1831	976	1660	1707	2089
S013	694	1250	1466	1813	747	1399	1437	1761	681	1250	1371	1813	783	1399	1409	1761
S013	688	1228	1396	1788	824	1405	1463	1810	667	1228	1366	1788	845	1405	1447	1810
S013	725	1327	1471	1876	801	1456	1541	1865	734	1327	1417	1876	826	1456	1477	1865
S013	743	1322	1477	1902	818	1462	1533	1888	794	1322	1437	1902	825	1462	1475	1888
S013	648	1278	1494	1868	793	1404	1464	1818	659	1278	1366	1868	816	1404	1402	1818
S013	737	1393	1596	2027	838	1504	1559	1974	727	1393	1570	2027	862	1504	1464	1974
S014	695	1139	1240	1530	745	1261	1390	1653	692	1139	1225	1530	804	1261	1401	1653
S014	656	1130	1237	1537	654	1113	1235	1516	668	1130	1246	1537	638	1113	1272	1516
S014	667	1160	1241	1566	665	1134	1289	1558	682	1160	1251	1566	664	1134	1289	1558
S014	678	1178	1252	1574	663	1156	1322	1583	695	1178	1228	1574	694	1156	1300	1583
S014	681	1158	1219	1576	664	1129	1230	1546	700	1158	1223	1576	709	1129	1213	1546
S014	697	1171	1249	1571	681	1148	1305	1581	685	1171	1244	1571	668	1148	1200	1581
S014	732	1196	1255	1597	684	1171	1308	1595	729	1196	1234	1597	712	1171	1318	1595
S014	669	1189	1271	1588	645	1172	1326	1591	683	1189	1234	1588	668	1172	1247	1591
S014	729	1231	1382	1698	674	1186	1312	1618	739	1231	1317	1698	674	1186	1335	1618
S014	680	1237	1461	1734	719	1255	1357	1692	693	1237	1391	1734	755	1255	1397	1692
S014	845	1445	1617	1957	944	1627	1759	2165	863	1445	1562	1957	962	1627	1709	2165
S014	795	1390	1623	1919	748	1388	1538	1900	818	1390	1420	1919	789	1388	1552	1900
S014	764	1380	1623	1898	768	1369	1464	1889	803	1380	1477	1898	801	1369	1483	1889
S014	773	1408	1488	1901	779	1400	1582	1897	784	1408	1612	1901	791	1400	1554	1897
S014	747	1373	1563	1878	776	1351	1454	1868	739	1373	1542	1878	822	1351	1545	1868
S014	739	1384	1504	1927	815	1370	1562	1901	756	1384	1575	1927	833	1370	1548	1901
S014	769	1428	1647	1988	783	1433	1636	1953	781	1428	1576	1988	788	1433	1631	1953
S015	497	1077	1223	1539	793	1392	1398	1726	493	1077	1133	1539	803	1392	1413	1726
S015	579	1148	1288	1576	656	1246	1285	1595	523	1148	1215	1576	668	1246	1287	1595
S015	616	1183	1333	1674	649	1254	1295	1604	579	1183	1219	1674	735	1254	1365	1604
S015	546	1155	1313	1631	683	1289	1352	1634	568	1155	1115	1631	711	1289	1238	1634
S015	577	1206	1423	1741	678	1317	1307	1656	599	1206	1250	1741	709	1317	1339	1656
S015	570	1164	1312	1672	715	1377	1336	1720	573	1164	1171	1672	757	1377	1346	1720
S015	615	1196	1390	1751	705	1350	1382	1709	687	1196	1317	1751	741	1350	1412	1709
S015	647	1203	1380	1766	738	1405	1367	1770	640	1203	1384	1766	798	1405	1356	1770
S015	631	1224	1413	1771	702	1390	1355	1771	671	1224	1353	1771	701	1390	1413	1771
S015	610	1207	1368	1780	721	1400	1318	1728	666	1207	1316	1780	789	1400	1398	1728
S015	610	1321	1571	1989	937	1746	1744	2154	610	1321	1480	1989	962	1746	1806	2154
S015	637	1282	1491	1880	779	1528	1552	1968	523	1282	1453	1880	779	1528	1511	1968
S015	639	1306	1519	1997	760	1462	1473	1898	580	1306	1518	1997	825	1462	1539	1898
S015	665	1341	1511	1985	791	1548	1591	2006	622	1341	1379	1985	812	1548	1612	2006
S015	642	1362	1569	2033	794	1550	1682	2011	634	1362	1477	2033	811	1550	1542	2011
S015	726	1431	1600	2029	800	1589	1700	2096	761	1431	1561	2029	865	1589	1665	2096
S015	720	1425	1714	2159	794	1543	1593	2006	694	1425	1641	2159	886	1543	1609	2006
